# Supplementary material
Source: publisher figshare collection journal article supplement (https://wellcome.figshare.com/ndownloader/files/22674944)
Supplement: Supplementary file 1 [file 22674944]

## Sheet: Sheet1
University	PMCID	PMID	DOI	Article title	Journal title	Pure Open Access	ISSN	EISSN	Publication Date	Electronic Publication Date	Publisher	Publisher Licence	Licence	EPMC Licence	Licence Source	EPMC Licence Source	Fulltext in EPMC?	XML Fulltext?	AAM?	Open Access	Compliance Wellcome Standard	Compliance Wellcome Deluxe	Provenance	Date of APC payment	APC paid (actual currency) excluding VAT	Currency of APC	APC paid (£) including VAT if charged	Additional publication costs (£)	Discounts, memberships & pre-payment agreements	Amount of APC charged to COAF grant (including VAT if charged) in £	Amount of APC charged to RCUK OA fund (including VAT if charged) in £	Licence	Notes	Ahead of Print?
Aberdeen	PMC7042134	32123791	10.1093/ehjcr/ytz191	Lifelong Recurrent Takotsubo Cardiomyopathy: A case report	European heart journal. Case reports	TRUE	2514-2119	2514-2119	2019-12-01T00:00:00Z	2019-10-24T00:00:00Z	Oxford University Press (OUP)	not applicable	cc-by	cc-by	epmc_api	epmc_api	TRUE	TRUE	FALSE	TRUE	TRUE	TRUE	Added PMCID from EUPMC_x000D_ Added PMID from EUPMC_x000D_ Confirmed fulltext is in EUPMC_x000D_ Confirmed is open access from EUPMC_x000D_ Added journal title from EUPMC_x000D_ Added issn from EUPMC_x000D_ Added eissn from EUPMC_x000D_ Added grants data from EUPMC_x000D_ Added date of publication from EUPMC_x000D_ Added electronic publication date from EUPMC_x000D_ Checking if XML is available f…	43745	420	GBP	504				504	CC-BY		Unknown
Aberdeen	PMC6787928	31173776	10.1016/j.jmb.2019.05.043	Interaction of the mechanosensitive channel, MscS, with the membrane bilayer through lipid intercalation into grooves and pockets.	Journal of molecular biology	FALSE	0022-2836, 1089-8638	1089-8638	2019-08-01T00:00:00Z	2019-06-04T00:00:00Z	Elsevier BV	not applicable	cc-by	cc-by	Unknown	Unknown	FALSE	FALSE	FALSE	FALSE	FALSE	FALSE	This article is not open access according to EUPMC, but since 6th March 2020 we take this to mean only that the publisher did not indicate to EUPMC that it can be included in their Open Access subset - it may well still be an OA article._x000D_ Added journal title from EUPMC_x000D_ Added issn from EUPMC_x000D_ Added eissn from EUPMC_x000D_ Added grants data from EUPMC_x000D_ Added date of publica…	43629	1960	GBP	2352				2352	CC-BY		FALSE
Aberdeen	PMC6532149	31143851	10.1186/s41927-019-0066-7	AxSpA patients who also meet criteria for fibromyalgia:Â identifying distinct patient clusters using data from a UK national register (BSRBR-AS)	BMC rheumatology	TRUE	2520-1026	2520-1026	2019-01-01T00:00:00Z	2019-05-20T00:00:00Z	Springer Science and Business Media LLC	not applicable	cc-by	cc-by	epmc_api	epmc_api	TRUE	TRUE	FALSE	TRUE	TRUE	TRUE	Added PMCID from EUPMC_x000D_ Confirmed fulltext is in EUPMC_x000D_ Confirmed is open access from EUPMC_x000D_ Added journal title from EUPMC_x000D_ Added issn from EUPMC_x000D_ Added eissn from EUPMC_x000D_ Added grants data from EUPMC_x000D_ Added date of publication from EUPMC_x000D_ Added electronic publication date from EUPMC_x000D_ Checking if XML is available from EUPMC (since 6th March 20…	43644	1370	GBP	1644	50			1704	CC BY	Admin fee for paying by invoice	Unknown
Aberdeen	Unknown	31085335	10.1016/j.jpain.2019.04.011	Transient effects of sleep on next-day pain and fatigue in older adults with symptomatic osteoarthritis	The journal of pain : official journal of the American Pain Society	FALSE	1526-5900, 1528-8447	1528-8447	2019-11-01T00:00:00Z	2019-05-11T00:00:00Z	Elsevier BV	Unknown	cc-by	cc-by	Unknown	Unknown	FALSE	FALSE	FALSE	FALSE	FALSE	FALSE	This article is not open access according to EUPMC, but since 6th March 2020 we take this to mean only that the publisher did not indicate to EUPMC that it can be included in their Open Access subset - it may well still be an OA article._x000D_ Added journal title from EUPMC_x000D_ Added issn from EUPMC_x000D_ Added eissn from EUPMC_x000D_ Added grants data from EUPMC_x000D_ Added date of publica…	43747	3500	USD	2833.32				2885	CC-BY		FALSE
Aberdeen	PMC6510970	30986680	10.1016/j.scitotenv.2019.03.304	More crop per drop: Exploring India's cereal water use since 2005	The Science of the total environment	FALSE	0048-9697, 1879-1026	1879-1026	2019-07-01T00:00:00Z	2019-03-25T00:00:00Z	Elsevier BV	not applicable	cc-by	cc-by	epmc_api	epmc_api	TRUE	FALSE	FALSE	FALSE	TRUE	FALSE	Added PMCID from EUPMC_x000D_ Confirmed fulltext is in EUPMC_x000D_ This article is not open access according to EUPMC, but since 6th March 2020 we take this to mean only that the publisher did not indicate to EUPMC that it can be included in their Open Access subset - it may well still be an OA article._x000D_ Added journal title from EUPMC_x000D_ Added issn from EUPMC_x000D_ Added eissn from EU…	43600	2930	EUR	3005.64				3005.64	CC BY		Unknown
Aberdeen	Unknown	30946681	10.1109/jbhi.2019.2907189	Motion during Acquisition is Associated with fMRI Brain Entropy	IEEE journal of biomedical and health informatics	FALSE	2168-2194, 2168-2208	2168-2208	2020-02-01T00:00:00Z	2019-04-01T00:00:00Z	Institute of Electrical and Electronics Engineers (IEEE)	Unknown	cc-by	cc-by	Unknown	Unknown	FALSE	FALSE	FALSE	FALSE	FALSE	FALSE	Added DOI from EUPMC_x000D_ This article is not open access according to EUPMC, but since 6th March 2020 we take this to mean only that the publisher did not indicate to EUPMC that it can be included in their Open Access subset - it may well still be an OA article._x000D_ Added journal title from EUPMC_x000D_ Added issn from EUPMC_x000D_ Added eissn from EUPMC_x000D_ Added date of publication fro…	43545	2045	USD	1892.07				1892.07	CC BY		FALSE
Aberdeen	PMC6504189	30829737	10.1097/AJP.0000000000000697	Sleep and pain: a systematic review of studies of mediation	The Clinical journal of pain	FALSE	0749-8047, 1536-5409	1536-5409	2019-06-01T00:00:00Z	Unknown	Ovid Technologies (Wolters Kluwer Health)	not applicable	cc-by	cc-by	epmc_api	epmc_api	TRUE	TRUE	FALSE	TRUE	TRUE	TRUE	Added PMCID from EUPMC_x000D_ Confirmed fulltext is in EUPMC_x000D_ Confirmed is open access from EUPMC_x000D_ Added journal title from EUPMC_x000D_ Added issn from EUPMC_x000D_ Added eissn from EUPMC_x000D_ Added grants data from EUPMC_x000D_ Added date of publication from EUPMC_x000D_ Checking if XML is available from EUPMC (since 6th March 2020 this is always done for any article we have a PMC…	43525	3800	USD	3647.65				3647.65	CC BY		Unknown
Aberdeen	PMC6359876	30705244	10.1136/bmjopen-2018-026793	Protocol for a multicentre randomised controlled parallel-group trial to compare the effectiveness of remotely delivered cognitive-behavioural and graded exercise interventions with usual care alone to lessen the impact of fatigue in inflammatory rheumatic diseases (LIFT)	BMJ open	TRUE	2044-6055	2044-6055	2019-01-01T00:00:00Z	2019-01-30T00:00:00Z	BMJ	not applicable	cc-by	cc-by	epmc_api	epmc_api	TRUE	TRUE	FALSE	TRUE	TRUE	TRUE	Added PMCID from EUPMC_x000D_ Confirmed fulltext is in EUPMC_x000D_ Confirmed is open access from EUPMC_x000D_ Added journal title from EUPMC_x000D_ Added issn from EUPMC_x000D_ Added eissn from EUPMC_x000D_ Added grants data from EUPMC_x000D_ Added date of publication from EUPMC_x000D_ Added electronic publication date from EUPMC_x000D_ Checking if XML is available from EUPMC (since 6th March 20…	43448	1350	GBP	1620				1620	CC BY		Unknown
Aberdeen	PMC6355986	30696734	10.1128/mBio.02535-18	Inhibition of classical and alternative modes of respiration in Candida albicans leads to cell wall remodelling and increased macrophage recognition	mBio	TRUE	2150-7511	2150-7511	2019-01-01T00:00:00Z	2019-01-29T00:00:00Z	American Society for Microbiology	not applicable	cc-by	cc-by	epmc_api	epmc_api	TRUE	TRUE	FALSE	TRUE	TRUE	TRUE	Added PMCID from EUPMC_x000D_ Confirmed fulltext is in EUPMC_x000D_ Confirmed is open access from EUPMC_x000D_ Added journal title from EUPMC_x000D_ Added issn from EUPMC_x000D_ Added eissn from EUPMC_x000D_ Added grants data from EUPMC_x000D_ Added date of publication from EUPMC_x000D_ Added electronic publication date from EUPMC_x000D_ Checking if XML is available from EUPMC (since 6th March 20…	43475	3640	USD	3154.81	313			3154.81	CC BY	Additional costs paid by author	Unknown
Aberdeen	PMC6195761	30370375	10.1016/j.tcsw.2018.09.001	Yeast species-specific, differential inhibition of ?-1,3-glucan synthesis by poacic acid and caspofungin	Cell surface (Amsterdam, Netherlands)	FALSE	2468-2330	2468-2330	2018-09-01T00:00:00Z	Unknown	Elsevier BV	not applicable	cc-by	cc-by	epmc_api	epmc_api	TRUE	TRUE	FALSE	TRUE	TRUE	TRUE	Added PMCID from EUPMC_x000D_ Confirmed fulltext is in EUPMC_x000D_ Confirmed is open access from EUPMC_x000D_ Added journal title from EUPMC_x000D_ Added eissn from EUPMC_x000D_ Added grants data from EUPMC_x000D_ Added date of publication from EUPMC_x000D_ Checking if XML is available from EUPMC (since 6th March 2020 this is always done for any article we have a PMCID for, regardless of other E…	43409	2651.16	EUR	2384.29				2384.29	CC BY		Unknown
Aberdeen	PMC3975277	24612447	10.1186/1471-2474-15-71	Maintained physical activity and physiotherapy in the management of distal arm pain Â– a randomised controlled trial	BMC musculoskeletal disorders	TRUE	1471-2474	1471-2474	2014-03-01T00:00:00Z	2014-03-10T00:00:00Z	Springer Science and Business Media LLC	not applicable	cc-by	cc-by	epmc_api	epmc_api	TRUE	TRUE	FALSE	TRUE	TRUE	TRUE	Added PMCID from EUPMC_x000D_ Added DOI from EUPMC_x000D_ Confirmed fulltext is in EUPMC_x000D_ Confirmed is open access from EUPMC_x000D_ Added journal title from EUPMC_x000D_ Added issn from EUPMC_x000D_ Added eissn from EUPMC_x000D_ Added grants data from EUPMC_x000D_ Added date of publication from EUPMC_x000D_ Added electronic publication date from EUPMC_x000D_ Checking if XML is available fr…	43577	1700	GBP	2045				2045	CC BY		Unknown
AHRI	PMC6887816	31738174	10.2196/15681	Building Mobile Phone-connected Diagnostics: A Qualitative Study Exploring PeopleÂ’s Â‘CandidacyÂ’ for mHealth Supported HIV Testing and Care Services in Rural KwaZulu-Natal, South Africa	Journal of medical Internet research	TRUE	1439-4456, 1438-8871	1438-8871	2019-11-01T00:00:00Z	2019-11-18T00:00:00Z	JMIR Publications Inc.	not applicable	cc-by	cc-by	epmc_api	epmc_api	TRUE	TRUE	FALSE	TRUE	TRUE	TRUE	Added PMCID from EUPMC_x000D_ Added PMID from EUPMC_x000D_ Added DOI from EUPMC_x000D_ Confirmed fulltext is in EUPMC_x000D_ Confirmed is open access from EUPMC_x000D_ Added journal title from EUPMC_x000D_ Added issn from EUPMC_x000D_ Added eissn from EUPMC_x000D_ Added grants data from EUPMC_x000D_ Added date of publication from EUPMC_x000D_ Added electronic publication date from EUPMC_x000D_ Ch…	$ 2,500.00	2023.23	RAN	1730.5							Unknown
AHRI	PMC6656755	31341191	10.1038/s41598-019-46455-7	Space-time clustering of recently-diagnosed tuberculosis and impact of ART scale-up: Evidence from an HIV hyper-endemic African population	Scientific reports	TRUE	2045-2322	2045-2322	2019-07-01T00:00:00Z	2019-07-24T00:00:00Z	Springer Science and Business Media LLC	not applicable	cc-by	cc-by	epmc_api	epmc_api	TRUE	TRUE	FALSE	TRUE	TRUE	TRUE	Added PMCID from EUPMC_x000D_ Added PMID from EUPMC_x000D_ Added DOI from EUPMC_x000D_ Confirmed fulltext is in EUPMC_x000D_ Confirmed is open access from EUPMC_x000D_ Added journal title from EUPMC_x000D_ Added issn from EUPMC_x000D_ Added eissn from EUPMC_x000D_ Added grants data from EUPMC_x000D_ Added date of publication from EUPMC_x000D_ Added electronic publication date from EUPMC_x000D_ Ch…	1713.5	1550.03	RAN	1258.24							Unknown
AHRI	PMC6615300	31286952	10.1186/s12910-019-0383-9	A reflection on ethical and methodological challenges of using separate interviews with adolescent-older carer dyads in rural South Africa	BMC medical ethics	TRUE	1472-6939	1472-6939	2019-07-01T00:00:00Z	2019-07-08T00:00:00Z	Springer Science and Business Media LLC	not applicable	cc-by	cc-by	epmc_api	epmc_api	TRUE	TRUE	FALSE	TRUE	TRUE	TRUE	Added PMCID from EUPMC_x000D_ Added PMID from EUPMC_x000D_ Added DOI from EUPMC_x000D_ Confirmed fulltext is in EUPMC_x000D_ Confirmed is open access from EUPMC_x000D_ Added journal title from EUPMC_x000D_ Added issn from EUPMC_x000D_ Added eissn from EUPMC_x000D_ Added grants data from EUPMC_x000D_ Added date of publication from EUPMC_x000D_ Added electronic publication date from EUPMC_x000D_ Ch…	1451	1312.51	RAN	1063.09							Unknown
AHRI	PMC6083494	30089485	10.1186/s12913-018-3404-3	The MONARCH intervention to enhance the quality of antenatal and postnatal primary health services in rural South Africa: protocol for a stepped wedge cluster randomized trial.	BMC health services research	TRUE	1472-6963	1472-6963	2018-08-01T00:00:00Z	2018-08-08T00:00:00Z	Springer Science and Business Media LLC	not applicable	cc-by	cc-by	epmc_api	epmc_api	TRUE	TRUE	FALSE	TRUE	TRUE	TRUE	Added PMCID from EUPMC_x000D_ Added PMID from EUPMC_x000D_ Added DOI from EUPMC_x000D_ Confirmed fulltext is in EUPMC_x000D_ Confirmed is open access from EUPMC_x000D_ Added journal title from EUPMC_x000D_ Added issn from EUPMC_x000D_ Added eissn from EUPMC_x000D_ Added grants data from EUPMC_x000D_ Added date of publication from EUPMC_x000D_ Added electronic publication date from EUPMC_x000D_ Ch…	1745	1485.79	RAN	1280.56							Unknown
Bath	PMC6728123	31487290	10.1371/journal.pone.0221242	Relationships between concurrent language ability and mental health outcomes in a South African sample of 13-year-olds	PloS one	TRUE	1932-6203	1932-6203	2019-01-01T00:00:00Z	2019-09-05T00:00:00Z	Public Library of Science (PLoS)	not applicable	cc-by	cc-by	epmc_api	epmc_api	TRUE	TRUE	FALSE	TRUE	TRUE	TRUE	Added PMCID from EUPMC_x000D_ Confirmed fulltext is in EUPMC_x000D_ Confirmed is open access from EUPMC_x000D_ Added journal title from EUPMC_x000D_ Added issn from EUPMC_x000D_ Added eissn from EUPMC_x000D_ Added grants data from EUPMC_x000D_ Added date of publication from EUPMC_x000D_ Added electronic publication date from EUPMC_x000D_ Checking if XML is available from EUPMC (since 6th March 20…	43707	1595	USD	1576.21	0	None	1576.21	0	CC BY		Unknown
Bath	PMC6391026	30807582	10.1371/journal.pone.0211758	Tweeting about public health policy: Social media response to the UK GovernmentÂ’s announcement of a Parliamentary vote on draft standardised packaging regulations	PloS one	TRUE	1932-6203	1932-6203	2019-01-01T00:00:00Z	2019-02-26T00:00:00Z	Public Library of Science (PLoS)	not applicable	cc-by	cc-by	epmc_api	epmc_api	TRUE	TRUE	FALSE	TRUE	TRUE	TRUE	Added PMCID from EUPMC_x000D_ Confirmed fulltext is in EUPMC_x000D_ Confirmed is open access from EUPMC_x000D_ Added journal title from EUPMC_x000D_ Added issn from EUPMC_x000D_ Added eissn from EUPMC_x000D_ Added grants data from EUPMC_x000D_ Added date of publication from EUPMC_x000D_ Added electronic publication date from EUPMC_x000D_ Checking if XML is available from EUPMC (since 6th March 20…	43517	1495	USD	1363.85	0	None	1363.85	0	CC BY		Unknown
Bath	PMC6358602	30710110	10.1038/s41598-018-37140-2	The catalytic activity and secretion of zebrafish RNases are essential for their in vivo function in motor neurons and vasculature	Scientific reports	TRUE	2045-2322	2045-2322	2019-02-01T00:00:00Z	2019-02-01T00:00:00Z	Springer Science and Business Media LLC	not applicable	cc-by	cc-by	epmc_api	epmc_api	TRUE	TRUE	FALSE	TRUE	TRUE	TRUE	Added PMCID from EUPMC_x000D_ Confirmed fulltext is in EUPMC_x000D_ Confirmed is open access from EUPMC_x000D_ Added journal title from EUPMC_x000D_ Added issn from EUPMC_x000D_ Added eissn from EUPMC_x000D_ Added grants data from EUPMC_x000D_ Added date of publication from EUPMC_x000D_ Added electronic publication date from EUPMC_x000D_ Checking if XML is available from EUPMC (since 6th March 20…	43497	1165	GBP	1398	0	None	1398	0	CC BY		Unknown
Bath	PMC6343330	30693096	10.1186/s40814-018-0385-2	IntEgrating Smoking Cessation treatment As part of usual Psychological care for dEpression and anxiety (ESCAPE): protocol for randomised and controlled, multicentre, acceptability, feasibility and implementation trial.	Pilot and feasibility studies	TRUE	2055-5784	2055-5784	2019-01-01T00:00:00Z	2019-01-22T00:00:00Z	Springer Science and Business Media LLC	not applicable	cc-by	cc-by	epmc_api	epmc_api	TRUE	TRUE	FALSE	TRUE	TRUE	TRUE	Added PMCID from EUPMC_x000D_ Confirmed fulltext is in EUPMC_x000D_ Confirmed is open access from EUPMC_x000D_ Added journal title from EUPMC_x000D_ Added issn from EUPMC_x000D_ Added eissn from EUPMC_x000D_ Added grants data from EUPMC_x000D_ Added date of publication from EUPMC_x000D_ Added electronic publication date from EUPMC_x000D_ Checking if XML is available from EUPMC (since 6th March 20…	43504	1615	GBP	1938	0	None	1938	0	CC BY	Additional funding information: Dr. Gemma Taylor is funded by a Cancer Research UK Postdoctoral Fellowship (C56067/A21330). Dr. Ali Shaw is funded through NIHR Research Capability Funding. The MRC Integrative Epidemiology Unit at the University of Bristol is supported by the Medical Research Council and the University of Bristol [MC_UU_12013/6]. Dr. David Kessler is funded by The Centre for Prima…	Unknown
BBK	Unknown	Unknown	10.1177/0022009418786789	Transnational Exchange in the Nazi New Order: The Spanish Blue Division and its Medical Services	Journal of Contemporary History	FALSE	0022-0094	Unknown	2018-08-28T00:00:00Z	2018-08-28T00:00:00Z	SAGE Publications	cc-by	cc-by	cc-by	publisher_splash_page	publisher_splash_page	FALSE	FALSE	FALSE	FALSE	FALSE	FALSE	Unable to locate article in EPMC._x000D_ Added publisher name from Crossref_x000D_ Added ISSN from Crossref_x000D_ Added journal title from Crossref_x000D_ Found DOI in CORE_x000D_ Searched OpenDOAR but could not find repo and/or URL_x000D_ Added repositories that CORE claims article is available from_x000D_ Could not find DOI in BASE_x000D_ Not attempting Grist API grant lookups since no grants …	43378			2640			2640		CC BY		Unknown
BBK	Unknown	Unknown	10.1111/mbe.12212	The unique contributions of verbal analogical reasoning and non-verbal matrix reasoning to science and maths problem-solving in adolescence	Mind, Brain, and Education	FALSE	1751-2271	Unknown	2019-08-16T00:00:00Z	Unknown	Wiley	cc-by	cc-by	cc-by	publisher_splash_page	publisher_splash_page	FALSE	FALSE	FALSE	FALSE	FALSE	FALSE	Unable to locate article in EPMC._x000D_ Added publisher name from Crossref_x000D_ Added ISSN from Crossref_x000D_ Added journal title from Crossref_x000D_ Found DOI in CORE_x000D_ Searched OpenDOAR but could not find repo and/or URL_x000D_ Added repositories that CORE claims article is available from_x000D_ Found DOI in BASE_x000D_ Searched OpenDOAR but could not find repo and/or URL_x000D_ Not …				2340			2340		CC BY		Unknown
BBK	Unknown	Unknonw	10.1016/j.geoforum.2018.10.007	A commentary on encountering austerity; the experiences of four men living in a London hostel	Geoforum	FALSE	0016-7185	Unknown	2018-10-05T00:00:00Z	2018-10-05T00:00:00Z	Elsevier BV	Unknown	cc-by	cc-by	Unknown	Unknown	FALSE	FALSE	FALSE	FALSE	FALSE	FALSE	Unable to locate article in EPMC._x000D_ Added publisher name from Crossref_x000D_ Added ISSN from Crossref_x000D_ Added journal title from Crossref_x000D_ Could not find DOI in CORE_x000D_ Could not find DOI in BASE_x000D_ Not attempting Grist API grant lookups since no grants data was obtained from EUPMC._x000D_ Not checking ahead of print status on pubmed. We don't have the article's PMID._x00…	43557			1776.97			1776.97		CC BY		Unknown
BBK	PMC6899430	31839694	10.1177/0952695119867021	Voices off: Stanley MilgramÂ’s cyranoids in historical context	History of the human sciences	FALSE	0952-6951, 1461-720X	1461-720X	2019-12-01T00:00:00Z	2019-09-24T00:00:00Z	SAGE Publications	not applicable	cc-by	cc-by	epmc_api	epmc_api	TRUE	TRUE	FALSE	TRUE	TRUE	TRUE	Added PMCID from EUPMC_x000D_ Added PMID from EUPMC_x000D_ Confirmed fulltext is in EUPMC_x000D_ Confirmed is open access from EUPMC_x000D_ Added journal title from EUPMC_x000D_ Added issn from EUPMC_x000D_ Added eissn from EUPMC_x000D_ Added grants data from EUPMC_x000D_ Added date of publication from EUPMC_x000D_ Added electronic publication date from EUPMC_x000D_ Checking if XML is available f…	43714			2640			2640		CC BY		Unknown
BBK	PMC6771723	31598132	10.1111/mbe.12198	Genome-wide association study of latent cognitive measures in adolescence: genetic overlap with intelligence and education	Mind, brain and education : the official journal of the International Mind, Brain, and Education Society	FALSE	1751-2271, 1751-228X	1751-228X	2019-08-01T00:00:00Z	2019-06-30T00:00:00Z	Wiley	not applicable	cc-by	cc-by	epmc_api	epmc_api	TRUE	TRUE	FALSE	TRUE	TRUE	TRUE	Added PMCID from EUPMC_x000D_ Confirmed fulltext is in EUPMC_x000D_ Confirmed is open access from EUPMC_x000D_ Added journal title from EUPMC_x000D_ Added issn from EUPMC_x000D_ Added eissn from EUPMC_x000D_ Added grants data from EUPMC_x000D_ Added date of publication from EUPMC_x000D_ Added electronic publication date from EUPMC_x000D_ Checking if XML is available from EUPMC (since 6th March 20…	43646			1950			1950		CC BY		Unknown
BBK	PMC6733973	31551848	10.3389/fpsyg.2019.01906	Preserved proactive control in ageing: a Stroop study with emotional faces vs. words	Frontiers in psychology	TRUE	1664-1078	1664-1078	2019-01-01T00:00:00Z	2019-09-03T00:00:00Z	Frontiers Media SA	not applicable	cc-by	cc-by	epmc_api	epmc_api	TRUE	TRUE	FALSE	TRUE	TRUE	TRUE	Added PMCID from EUPMC_x000D_ Confirmed fulltext is in EUPMC_x000D_ Confirmed is open access from EUPMC_x000D_ Added journal title from EUPMC_x000D_ Added issn from EUPMC_x000D_ Added eissn from EUPMC_x000D_ Added grants data from EUPMC_x000D_ Added date of publication from EUPMC_x000D_ Added electronic publication date from EUPMC_x000D_ Checking if XML is available from EUPMC (since 6th March 20…	43745			2235.53			2235.53		CC BY		Unknown
BBK	PMC6716362	31523202	10.3366/pah.2019.0281	Michael Balint's Word Trail: The Â‘OcnophilÂ’, the Â‘PhilobatÂ’ and Creative Dyads	Psychoanalysis and history	FALSE	1460-8235, 1755-201X	1755-201X	2019-04-01T00:00:00Z	Unknown	Edinburgh University Press	not applicable	cc-by	cc-by	epmc_api	epmc_api	TRUE	TRUE	FALSE	TRUE	TRUE	TRUE	Added PMCID from EUPMC_x000D_ Confirmed fulltext is in EUPMC_x000D_ Confirmed is open access from EUPMC_x000D_ Added journal title from EUPMC_x000D_ Added issn from EUPMC_x000D_ Added eissn from EUPMC_x000D_ Added grants data from EUPMC_x000D_ Added date of publication from EUPMC_x000D_ Checking if XML is available from EUPMC (since 6th March 2020 this is always done for any article we have a PMC…	43546			1200			1200		CC BY		Unknown
BBK	PMC6969340	31299480	10.1016/j.dcn.2019.100676	Fronto-temporoparietal connectivity and self-awareness in 18-month-olds: A resting state fNIRS study Author: M	Developmental cognitive neuroscience	TRUE	1878-9293, 1878-9307	1878-9307	2019-08-01T00:00:00Z	2019-06-22T00:00:00Z	Elsevier BV	not applicable	cc-by	cc-by	epmc_api	epmc_api	TRUE	TRUE	FALSE	TRUE	TRUE	TRUE	Added PMCID from EUPMC_x000D_ Confirmed fulltext is in EUPMC_x000D_ Confirmed is open access from EUPMC_x000D_ Added journal title from EUPMC_x000D_ Added issn from EUPMC_x000D_ Added eissn from EUPMC_x000D_ Added grants data from EUPMC_x000D_ Added date of publication from EUPMC_x000D_ Added electronic publication date from EUPMC_x000D_ Checking if XML is available from EUPMC (since 6th March 20…	43721			2371.6			2371.6		CC BY		Unknown
BBK	PMC6736417	31183501	10.1093/femsre/fuz016	Cell wall peptidoglycan inÂ Mycobacterium tuberculosis: An AchillesÂ’ heel for the TB-causing pathogen	FEMS microbiology reviews	FALSE	0168-6445, 1574-6976	1574-6976	2019-09-01T00:00:00Z	Unknown	Oxford University Press (OUP)	not applicable	cc-by	cc-by	epmc_api	epmc_api	TRUE	TRUE	FALSE	TRUE	TRUE	TRUE	Added PMCID from EUPMC_x000D_ Confirmed fulltext is in EUPMC_x000D_ Confirmed is open access from EUPMC_x000D_ Added journal title from EUPMC_x000D_ Added issn from EUPMC_x000D_ Added eissn from EUPMC_x000D_ Added grants data from EUPMC_x000D_ Added date of publication from EUPMC_x000D_ Checking if XML is available from EUPMC (since 6th March 2020 this is always done for any article we have a PMC…	43686			1031.5			1031.5		CC BY		Unknown
BBK	PMC6776073	31169397	10.1037/rev0000151	Computational Modeling of Interventions for Developmental Disorders	Psychological review	FALSE	0033-295X, 1939-1471	1939-1471	2019-10-01T00:00:00Z	2019-06-06T00:00:00Z	American Psychological Association (APA)	not applicable	cc-by	cc-by	epmc_api	epmc_api	TRUE	TRUE	FALSE	TRUE	TRUE	TRUE	Added PMCID from EUPMC_x000D_ Confirmed fulltext is in EUPMC_x000D_ Confirmed is open access from EUPMC_x000D_ Added journal title from EUPMC_x000D_ Added issn from EUPMC_x000D_ Added eissn from EUPMC_x000D_ Added grants data from EUPMC_x000D_ Added date of publication from EUPMC_x000D_ Added electronic publication date from EUPMC_x000D_ Checking if XML is available from EUPMC (since 6th March 20…	43719			4017.73			4017.73		CC BY		Unknown
BBK	PMC6478146	30856416	10.1016/j.jecp.2019.01.015	Selective facial mimicry of native over foreign speakers in preverbal infants	Journal of experimental child psychology	FALSE	0022-0965, 1096-0457	1096-0457	2019-07-01T00:00:00Z	2019-03-08T00:00:00Z	Elsevier BV	not applicable	cc-by	cc-by	epmc_api	epmc_api	TRUE	TRUE	FALSE	TRUE	TRUE	TRUE	Added PMCID from EUPMC_x000D_ Confirmed fulltext is in EUPMC_x000D_ Confirmed is open access from EUPMC_x000D_ Added journal title from EUPMC_x000D_ Added issn from EUPMC_x000D_ Added eissn from EUPMC_x000D_ Added grants data from EUPMC_x000D_ Added date of publication from EUPMC_x000D_ Added electronic publication date from EUPMC_x000D_ Checking if XML is available from EUPMC (since 6th March 20…	43623			2547.41			2547.41		CC BY		Unknown
BBK	PMC6382286	30828706	10.1080/13506285.2018.1544181	Saccades predict and synchronize to visual rhythms irrespective of musical beats	Visual cognition	FALSE	1350-6285	Unknown	2018-01-01T00:00:00Z	2018-12-04T00:00:00Z	Informa UK Limited	not applicable	cc-by	cc-by	epmc_api	epmc_api	TRUE	TRUE	FALSE	TRUE	TRUE	TRUE	Added PMCID from EUPMC_x000D_ Confirmed fulltext is in EUPMC_x000D_ Confirmed is open access from EUPMC_x000D_ Added journal title from EUPMC_x000D_ Added issn from EUPMC_x000D_ Added date of publication from EUPMC_x000D_ Added electronic publication date from EUPMC_x000D_ Checking if XML is available from EUPMC (since 6th March 2020 this is always done for any article we have a PMCID for, regard…	43483			2274			2274		CC BY		Unknown
BBK	PMC6362355	30602585	10.15252/embr.201847012	From conjugation to T4S systems in Gram?negative bacteria: a mechanistic biology perspective	EMBO reports	FALSE	1469-221X, 1469-3178	1469-3178	2019-02-01T00:00:00Z	2019-01-02T00:00:00Z	EMBO	not applicable	cc-by	cc-by	epmc_api	epmc_api	TRUE	TRUE	FALSE	TRUE	TRUE	TRUE	Added PMCID from EUPMC_x000D_ Confirmed fulltext is in EUPMC_x000D_ Confirmed is open access from EUPMC_x000D_ Added journal title from EUPMC_x000D_ Added issn from EUPMC_x000D_ Added eissn from EUPMC_x000D_ Added grants data from EUPMC_x000D_ Added date of publication from EUPMC_x000D_ Added electronic publication date from EUPMC_x000D_ Checking if XML is available from EUPMC (since 6th March 20…	43511			4200			4200		CC BY		Unknown
BBK	PMC6297894	30595623	10.1177/0952695118808411	Psychotherapy in Europe	History of the human sciences	FALSE	0952-6951, 1461-720X	1461-720X	2018-10-01T00:00:00Z	2018-12-12T00:00:00Z	SAGE Publications	not applicable	cc-by	cc-by	epmc_api	epmc_api	TRUE	TRUE	FALSE	TRUE	TRUE	TRUE	Added PMCID from EUPMC_x000D_ Confirmed fulltext is in EUPMC_x000D_ Confirmed is open access from EUPMC_x000D_ Added journal title from EUPMC_x000D_ Added issn from EUPMC_x000D_ Added eissn from EUPMC_x000D_ Added grants data from EUPMC_x000D_ Added date of publication from EUPMC_x000D_ Added electronic publication date from EUPMC_x000D_ Checking if XML is available from EUPMC (since 6th March 20…	43434			2640			2640		CC BY		Unknown
BBK	PMC6263212	30515021	10.1093/shm/hky091	In Plain Sight: Open Doors, Mixed-sex Wards and Sexual Abuse in English Psychiatric Hospitals, 1950sÂ—Early 1990s	Social history of medicine : the journal of the Society for the Social History of Medicine	FALSE	0951-631X, 1477-4666	1477-4666	2018-11-01T00:00:00Z	2018-11-08T00:00:00Z	Oxford University Press (OUP)	not applicable	cc-by	cc-by	epmc_api	epmc_api	TRUE	TRUE	FALSE	TRUE	TRUE	TRUE	Added PMCID from EUPMC_x000D_ Confirmed fulltext is in EUPMC_x000D_ Confirmed is open access from EUPMC_x000D_ Added journal title from EUPMC_x000D_ Added issn from EUPMC_x000D_ Added eissn from EUPMC_x000D_ Added grants data from EUPMC_x000D_ Added date of publication from EUPMC_x000D_ Added electronic publication date from EUPMC_x000D_ Checking if XML is available from EUPMC (since 6th March 20…	43427			2247.6			2247.6		CC BY		Unknown
BBK	PMC6263210	30515018	10.1093/shm/hky103	Cultures of Harm in Institutions of Care: Introduction	Social history of medicine : the journal of the Society for the Social History of Medicine	FALSE	0951-631X, 1477-4666	1477-4666	2018-11-01T00:00:00Z	2018-11-19T00:00:00Z	Oxford University Press (OUP)	not applicable	cc-by	cc-by	epmc_api	epmc_api	TRUE	TRUE	FALSE	TRUE	TRUE	TRUE	Added PMCID from EUPMC_x000D_ Confirmed fulltext is in EUPMC_x000D_ Confirmed is open access from EUPMC_x000D_ Added journal title from EUPMC_x000D_ Added issn from EUPMC_x000D_ Added eissn from EUPMC_x000D_ Added date of publication from EUPMC_x000D_ Added electronic publication date from EUPMC_x000D_ Checking if XML is available from EUPMC (since 6th March 2020 this is always done for any artic…				2360.4			2360.4		CC BY		Unknown
BBK	PMC6767077	30415485	10.1111/desc.12771	The role of sensorimotor experience in the development of mimicry in infancy	Developmental science	FALSE	1363-755X, 1467-7687	1467-7687	2019-05-01T00:00:00Z	2018-12-04T00:00:00Z	Wiley	not applicable	cc-by	cc-by	epmc_api	epmc_api	TRUE	TRUE	FALSE	TRUE	TRUE	TRUE	Added PMCID from EUPMC_x000D_ Confirmed fulltext is in EUPMC_x000D_ Confirmed is open access from EUPMC_x000D_ Added journal title from EUPMC_x000D_ Added issn from EUPMC_x000D_ Added eissn from EUPMC_x000D_ Added grants data from EUPMC_x000D_ Added date of publication from EUPMC_x000D_ Added electronic publication date from EUPMC_x000D_ Checking if XML is available from EUPMC (since 6th March 20…	43700			2820			2820		CC BY		Unknown
BBK	PMC6206258	30405374	10.3389/fnhum.2018.00402	Differential Subjective Experiences in Learners and Non-learners in Frontal Alpha Neurofeedback: Piloting a Mixed-Method Approach	Frontiers in Human Neuroscience	TRUE	1662-5161	1662-5161	2018-01-01T00:00:00Z	2018-10-23T00:00:00Z	Frontiers Media SA	not applicable	cc-by	cc-by	epmc_api	epmc_api	TRUE	TRUE	FALSE	TRUE	TRUE	TRUE	Added PMCID from EUPMC_x000D_ Confirmed fulltext is in EUPMC_x000D_ Confirmed is open access from EUPMC_x000D_ Added journal title from EUPMC_x000D_ Added issn from EUPMC_x000D_ Added eissn from EUPMC_x000D_ Added date of publication from EUPMC_x000D_ Added electronic publication date from EUPMC_x000D_ Checking if XML is available from EUPMC (since 6th March 2020 this is always done for any artic…	43468			2079.34			2079.34		CC BY		Unknown
Birmingham	Unknown	Unknown	Unknown	Methods for human circadian phenotyping and diurnal performance testing in the real world	Journal of visualized experiments : JoVE	FALSE	Unknown	Unknown	Unknown	Unknown	Unknown	Unknown	Unknown	Unknown	Unknown	Unknown	FALSE	FALSE	FALSE	FALSE	FALSE	FALSE	Unable to locate article in EPMC._x000D_ Unable to obtain DOI, PMID or PMCID for this article. Compliance information may be severely limited._x000D_ Not attempting Crossref / CORE / BASE lookups - do not have DOI for article._x000D_ Not attempting Grist API grant lookups since no grants data was obtained from EUPMC._x000D_ Not checking ahead of print status on pubmed. We don't have the article's…		4200	USD	3530.82		None	3530.82				Unknown
Birmingham	Unknown	Unknown	10.1016/j.coche.2017.12.004	Designing antigens for the prevention and treatment of autoimmune diseases	Current Opinion in Chemical Engineering	FALSE	2211-3398	Unknown	Unknown	Unknown	Elsevier BV	Unknown	cc-by	Unknown	Unknown	Unknown	FALSE	FALSE	FALSE	FALSE	FALSE	FALSE	Unable to locate article in EPMC._x000D_ Added publisher name from Crossref_x000D_ Added ISSN from Crossref_x000D_ Added journal title from Crossref_x000D_ Found DOI in CORE_x000D_ Searched OpenDOAR but could not find repo and/or URL_x000D_ Added repositories that CORE claims article is available from_x000D_ Found DOI in BASE_x000D_ Searched OpenDOAR but could not find repo and/or URL_x000D_ Not …		3363.97	EUR	2879.08		None			CC BY-NC-ND		Unknown
Birmingham	Unknown	Unknown	Unknown	Predicting Age-Associated Muscle Degeneration using Raman Spectroscopy	Unknown	FALSE	Unknown	Unknown	2018-04-01T00:00:00Z	2018-04-01T00:00:00Z	J R Soc Med	Unknown	Unknown	Unknown	Unknown	Unknown	FALSE	FALSE	FALSE	FALSE	FALSE	FALSE	Unable to locate article in EPMC._x000D_ Unable to obtain DOI, PMID or PMCID for this article. Compliance information may be severely limited._x000D_ Not attempting Crossref / CORE / BASE lookups - do not have DOI for article._x000D_ Not attempting Grist API grant lookups since no grants data was obtained from EUPMC._x000D_ Not checking ahead of print status on pubmed. We don't have the article's…		1360	GBP	1632		Institutional_Prepayment	1632			Wiley OAPA	Unknown
Birmingham	Unknown	Unknown	10.1111/camh.12345	Narrative Matters: Young people, social media and body image	Child and Adolescent Mental Health	FALSE	1475-357X	Unknown	2019-07-28 T00:00:00Z	Unknown	Wiley	not applicable	cc-by	cc-by	publisher_splash_page	Unknown	FALSE	FALSE	FALSE	FALSE	FALSE	FALSE	Unable to locate article in EPMC._x000D_ Added publisher name from Crossref_x000D_ Added ISSN from Crossref_x000D_ Added journal title from Crossref_x000D_ Found DOI in CORE_x000D_ Searched OpenDOAR but could not find repo and/or URL_x000D_ Added repositories that CORE claims article is available from_x000D_ Could not find DOI in BASE_x000D_ Not attempting Grist API grant lookups since no grants …		1312.5	GBP	1575		Institutional_Prepayment	1575		CC BY	Wiley OAPA	Unknown
Birmingham	PMC6996392	32123830	10.1096/fba.2018-00048	A whole-cell high-throughput phenotypic screen to identify inhibitors of mycobacterial amino acid biosynthesis	FASEB bioAdvances	TRUE	2573-9832	2573-9832	2019-04-01T00:00:00Z	2019-01-22T00:00:00Z	FASEB	not applicable	cc-by	cc-by	epmc_api	epmc_api	TRUE	TRUE	FALSE	TRUE	TRUE	TRUE	Added PMCID from EUPMC_x000D_ Added PMID from EUPMC_x000D_ Confirmed fulltext is in EUPMC_x000D_ Confirmed is open access from EUPMC_x000D_ Added journal title from EUPMC_x000D_ Added issn from EUPMC_x000D_ Added eissn from EUPMC_x000D_ Added grants data from EUPMC_x000D_ Added date of publication from EUPMC_x000D_ Added electronic publication date from EUPMC_x000D_ Checking if XML is available f…		1271	GBP	1525.2		Institutional_Prepayment	0	1525.2	CC BY	Wiley OAPA	Unknown
Birmingham	PMC6914302	31885839	10.1136/flgastro-2018-101139	Medical liver biopsy Â– background, indications, procedure and histopathology	Frontline gastroenterology	FALSE	2041-4137, 2041-4145	2041-4145	2020-01-01T00:00:00Z	2019-03-02T00:00:00Z	BMJ	not applicable	cc-by	cc-by	epmc_api	epmc_api	TRUE	TRUE	FALSE	TRUE	TRUE	TRUE	Added PMCID from EUPMC_x000D_ Added PMID from EUPMC_x000D_ Confirmed fulltext is in EUPMC_x000D_ Confirmed is open access from EUPMC_x000D_ Added journal title from EUPMC_x000D_ Added issn from EUPMC_x000D_ Added eissn from EUPMC_x000D_ Added grants data from EUPMC_x000D_ Added date of publication from EUPMC_x000D_ Added electronic publication date from EUPMC_x000D_ Checking if XML is available f…		850	GBP	850		Institutional_Prepayment	0	850	CC BY	BMJ OA Account	Unknown
Birmingham	PMC6816425	31692900	10.1080/23723556.2019.1656500	BRCA1-BARD1: the importance of being in shape	Molecular & cellular oncology	FALSE	2372-3556	2372-3556	2019-01-01T00:00:00Z	2019-09-11T00:00:00Z	Informa UK Limited	Unknown	cc-by	cc-by	Unknown	Unknown	FALSE	FALSE	FALSE	FALSE	FALSE	FALSE	Added PMID from EUPMC_x000D_ This article is not open access according to EUPMC, but since 6th March 2020 we take this to mean only that the publisher did not indicate to EUPMC that it can be included in their Open Access subset - it may well still be an OA article._x000D_ Added journal title from EUPMC_x000D_ Added issn from EUPMC_x000D_ Added eissn from EUPMC_x000D_ Added grants data from EUPMC…		190.92	GBP	229.1		JiscCollections_Taylor & Francis	229.1		CC BY		FALSE
Birmingham	PMC6774259	31598094	10.1002/ejoc.201900850	Balancing bulkiness in gold(I) phosphino-triazole catalysis	European journal of organic chemistry	FALSE	1434-193X	Unknown	2019-09-01T00:00:00Z	2019-07-30T00:00:00Z	Wiley	not applicable	cc-by	cc-by	epmc_api	epmc_api	TRUE	TRUE	FALSE	TRUE	TRUE	TRUE	Added PMCID from EUPMC_x000D_ Added PMID from EUPMC_x000D_ Confirmed fulltext is in EUPMC_x000D_ Confirmed is open access from EUPMC_x000D_ Added journal title from EUPMC_x000D_ Added issn from EUPMC_x000D_ Added grants data from EUPMC_x000D_ Added date of publication from EUPMC_x000D_ Added electronic publication date from EUPMC_x000D_ Checking if XML is available from EUPMC (since 6th March 202…		1762.5	GBP	2115		Institutional_Prepayment	0	2115	CC BY	Wiley OAPA	Unknown
Birmingham	PMC6748184	31582990	10.1155/2019/8540706	Designing microfluidic devices to sort haematopoietic stem cells based on their mechanical properties	Stem cells international	TRUE	1687-966X, 1687-9678	1687-9678	2019-01-01T00:00:00Z	2019-09-05T00:00:00Z	Hindawi Limited	not applicable	cc-by	cc-by	epmc_api	epmc_api	TRUE	TRUE	FALSE	TRUE	TRUE	TRUE	Added PMCID from EUPMC_x000D_ Added PMID from EUPMC_x000D_ Confirmed fulltext is in EUPMC_x000D_ Confirmed is open access from EUPMC_x000D_ Added journal title from EUPMC_x000D_ Added issn from EUPMC_x000D_ Added eissn from EUPMC_x000D_ Added grants data from EUPMC_x000D_ Added date of publication from EUPMC_x000D_ Added electronic publication date from EUPMC_x000D_ Checking if XML is available f…		1900	USD	2202.11		None	2202.11		CC BY		Unknown
Birmingham	Unknown	31566620	10.3791/59700		Journal of visualized experiments : JoVE	FALSE	1940-087X	1940-087X	2019-09-01T00:00:00Z	2019-09-16T00:00:00Z	MyJove Corporation	Unknown	Unknown	Unknown	Unknown	Unknown	FALSE	FALSE	FALSE	FALSE	FALSE	FALSE	This article is not open access according to EUPMC, but since 6th March 2020 we take this to mean only that the publisher did not indicate to EUPMC that it can be included in their Open Access subset - it may well still be an OA article._x000D_ Added journal title from EUPMC_x000D_ Added issn from EUPMC_x000D_ Added eissn from EUPMC_x000D_ Added date of publication from EUPMC_x000D_ Added electro…		4200	USD	3960.31		None	3960.31		CC BY		FALSE
Birmingham	Unknown	31566620	10.3791/59700	Splicing-dependent NMD requires Prp17 in Saccharomyces cerevisiae	Journal of visualized experiments : JoVE	FALSE	1940-087X	1940-087X	2019-09-01T00:00:00Z	2019-09-16T00:00:00Z	MyJove Corporation	Unknown	Unknown	Unknown	Unknown	Unknown	FALSE	FALSE	FALSE	FALSE	FALSE	FALSE	This article is not open access according to EUPMC, but since 6th March 2020 we take this to mean only that the publisher did not indicate to EUPMC that it can be included in their Open Access subset - it may well still be an OA article._x000D_ Added journal title from EUPMC_x000D_ Added issn from EUPMC_x000D_ Added eissn from EUPMC_x000D_ Added date of publication from EUPMC_x000D_ Added electro…		1491	GBP	1789.2		None		1789.2	CC BY		FALSE
Birmingham	Unknown	31540744	10.1016/j.radonc.2019.06.014	The feasibility, safety and optimization of multiple prolonged breath-holds for radiotherapy	Radiotherapy and oncology : journal of the European Society for Therapeutic Radiology and Oncology	FALSE	0167-8140, 1879-0887	1879-0887	2019-12-01T00:00:00Z	2019-09-18T00:00:00Z	Elsevier BV	Unknown	cc-by	cc-by	Unknown	Unknown	FALSE	FALSE	FALSE	FALSE	FALSE	FALSE	This article is not open access according to EUPMC, but since 6th March 2020 we take this to mean only that the publisher did not indicate to EUPMC that it can be included in their Open Access subset - it may well still be an OA article._x000D_ Added journal title from EUPMC_x000D_ Added issn from EUPMC_x000D_ Added eissn from EUPMC_x000D_ Added date of publication from EUPMC_x000D_ Added electro…		1770	GBP	2124		None	2124				FALSE
Birmingham	PMC6899442	31533028	10.1016/j.celrep.2019.08.040	RUNX1-ETO orchestrates dynamic enhancer promoter communication in t(8;21) Acute Myeloid Leukemia	Cell reports	TRUE	2211-1247	2211-1247	2019-09-01T00:00:00Z	Unknown	Elsevier BV	Unknown	cc-by	Unknown	Unknown	Unknown	TRUE	FALSE	FALSE	FALSE	FALSE	FALSE	Added PMCID from EUPMC_x000D_ Confirmed fulltext is in EUPMC_x000D_ This article is not open access according to EUPMC, but since 6th March 2020 we take this to mean only that the publisher did not indicate to EUPMC that it can be included in their Open Access subset - it may well still be an OA article._x000D_ Added journal title from EUPMC_x000D_ Added issn from EUPMC_x000D_ Added eissn from EU…		4080	GBP	4080		None	4080				Unknown
Birmingham	PMC6900184	31518447	10.1111/mmi.14386	The Escherichia coli MarA protein regulates the ycgZ-ymgABC operon to inhibit biofilm formation	Molecular microbiology	FALSE	0950-382X, 1365-2958	1365-2958	2019-11-01T00:00:00Z	2019-09-29T00:00:00Z	Wiley	not applicable	cc-by	cc-by	epmc_api	epmc_api	TRUE	TRUE	FALSE	TRUE	TRUE	TRUE	Added PMCID from EUPMC_x000D_ Confirmed fulltext is in EUPMC_x000D_ Confirmed is open access from EUPMC_x000D_ Added journal title from EUPMC_x000D_ Added issn from EUPMC_x000D_ Added eissn from EUPMC_x000D_ Added grants data from EUPMC_x000D_ Added date of publication from EUPMC_x000D_ Added electronic publication date from EUPMC_x000D_ Checking if XML is available from EUPMC (since 6th March 20…		1740.75	GBP	2088.9		Institutional_Prepayment	0	2088.9	CC BY	Wiley OAPA	Unknown
Birmingham	PMC6900228	31446426	10.1136/heartjnl-2019-315229	A study of indications for cardiac device implantation and utilization in Fabry cardiomyopathy	Heart (British Cardiac Society)	FALSE	1355-6037, 1468-201X	1468-201X	2019-12-01T00:00:00Z	2019-08-24T00:00:00Z	BMJ	not applicable	cc-by	cc-by	epmc_api	epmc_api	TRUE	TRUE	FALSE	TRUE	TRUE	TRUE	Added PMCID from EUPMC_x000D_ Confirmed fulltext is in EUPMC_x000D_ Confirmed is open access from EUPMC_x000D_ Added journal title from EUPMC_x000D_ Added issn from EUPMC_x000D_ Added eissn from EUPMC_x000D_ Added grants data from EUPMC_x000D_ Added date of publication from EUPMC_x000D_ Added electronic publication date from EUPMC_x000D_ Checking if XML is available from EUPMC (since 6th March 20…		1147.5	GBP	1377		Institutional_Prepayment	1377		CC BY	BMJ OA Account	Unknown
Birmingham	PMC6698000	31420008	10.1186/s13075-019-1972-1	11?-HSD1 plays a critical role in trabecular bone loss associated with systemic glucocorticoid therapy	Arthritis research & therapy	TRUE	1478-6354, 1478-6362	1478-6362	2019-08-01T00:00:00Z	2019-08-16T00:00:00Z	Springer Science and Business Media LLC	not applicable	cc-by	cc-by	epmc_api	epmc_api	TRUE	TRUE	FALSE	TRUE	TRUE	TRUE	Added PMCID from EUPMC_x000D_ Confirmed fulltext is in EUPMC_x000D_ Confirmed is open access from EUPMC_x000D_ Added journal title from EUPMC_x000D_ Added issn from EUPMC_x000D_ Added eissn from EUPMC_x000D_ Added grants data from EUPMC_x000D_ Added date of publication from EUPMC_x000D_ Added electronic publication date from EUPMC_x000D_ Checking if XML is available from EUPMC (since 6th March 20…		1487.5	GBP	1785		Institutional_Prepayment	1785		CC BY	BMC Prepay Account	Unknown
Birmingham	PMC6695526	31402008	10.1016/S2214-109X(19)30336-5	Antibiotic prophylaxis in the surgical management of miscarriage in low income countries: a cost-effectiveness analysis based on the AIMS trial	The Lancet. Global health	TRUE	2214-109X	2214-109X	2019-09-01T00:00:00Z	Unknown	Elsevier BV	not applicable	cc-by	cc-by	epmc_api	epmc_api	TRUE	TRUE	FALSE	TRUE	TRUE	TRUE	Added PMCID from EUPMC_x000D_ Confirmed fulltext is in EUPMC_x000D_ Confirmed is open access from EUPMC_x000D_ Added journal title from EUPMC_x000D_ Added issn from EUPMC_x000D_ Added eissn from EUPMC_x000D_ Added grants data from EUPMC_x000D_ Added date of publication from EUPMC_x000D_ Checking if XML is available from EUPMC (since 6th March 2020 this is always done for any article we have a PMC…		4312.2	EUR	4838.92		None	4838.92		CC BY		Unknown
Birmingham	PMC7055508	31378119	10.1080/09537104.2019.1648781	SLFN14 gene mutations associated with bleeding	Platelets	FALSE	0953-7104, 1369-1635	1369-1635	2020-01-01T00:00:00Z	2019-08-04T00:00:00Z	Informa UK Limited	Unknown	cc-by	cc-by	epmc_api	epmc_api	FALSE	FALSE	FALSE	FALSE	FALSE	FALSE	This article is not open access according to EUPMC, but since 6th March 2020 we take this to mean only that the publisher did not indicate to EUPMC that it can be included in their Open Access subset - it may well still be an OA article._x000D_ Added journal title from EUPMC_x000D_ Added issn from EUPMC_x000D_ Added eissn from EUPMC_x000D_ Added grants data from EUPMC_x000D_ Added date of publica…		1695.75	GBP	2034.9		JiscCollections_Taylor & Francis	2034.9		CC BY		FALSE
Birmingham	PMC6918062	31372656	10.1093/cvr/cvz202	Long-lasting blood pressure lowering effects of nitrite are NO-independent and mediated by hydrogen peroxide, persulfides and oxidation of protein kinase G 1a redox signaling	Cardiovascular research	FALSE	0008-6363, 1755-3245	1755-3245	2020-01-01T00:00:00Z	Unknown	Oxford University Press (OUP)	not applicable	cc-by	cc-by	epmc_api	epmc_api	TRUE	TRUE	FALSE	TRUE	TRUE	TRUE	Added PMCID from EUPMC_x000D_ Confirmed fulltext is in EUPMC_x000D_ Confirmed is open access from EUPMC_x000D_ Added journal title from EUPMC_x000D_ Added issn from EUPMC_x000D_ Added eissn from EUPMC_x000D_ Added grants data from EUPMC_x000D_ Added date of publication from EUPMC_x000D_ Checking if XML is available from EUPMC (since 6th March 2020 this is always done for any article we have a PMC…		2258	GBP	2709.6		None	0	2709.6	CC BY		Unknown
Birmingham	PMC6676537	31370858	10.1186/s13075-019-1962-3	Therapeutic Glucocorticoids Prevent Bone Loss but Drive Muscle Wasting When Administered in Chronic Polyarthritis	Arthritis research & therapy	TRUE	1478-6354, 1478-6362	1478-6362	2019-08-01T00:00:00Z	2019-08-01T00:00:00Z	Springer Science and Business Media LLC	not applicable	cc-by	cc-by	epmc_api	epmc_api	TRUE	TRUE	FALSE	TRUE	TRUE	TRUE	Added PMCID from EUPMC_x000D_ Confirmed fulltext is in EUPMC_x000D_ Confirmed is open access from EUPMC_x000D_ Added journal title from EUPMC_x000D_ Added issn from EUPMC_x000D_ Added eissn from EUPMC_x000D_ Added grants data from EUPMC_x000D_ Added date of publication from EUPMC_x000D_ Added electronic publication date from EUPMC_x000D_ Checking if XML is available from EUPMC (since 6th March 20…		1589.5	GBP	1907.4		Institutional_Prepayment	1907.4		CC BY	BMC Prepay Account	Unknown
Birmingham	PMC6857441	31362062	10.1016/j.jsbmb.2019.105439	Human steroid biosynthesis, metabolism and excretion are differentially reflected by serum and urine steroid metabolomes: A comprehensive review	The Journal of steroid biochemistry and molecular biology	FALSE	0960-0760, 1879-1220	1879-1220	2019-11-01T00:00:00Z	2019-07-27T00:00:00Z	Elsevier BV	not applicable	cc-by	cc-by	epmc_api	epmc_api	TRUE	TRUE	FALSE	TRUE	TRUE	TRUE	Added PMCID from EUPMC_x000D_ Confirmed fulltext is in EUPMC_x000D_ Confirmed is open access from EUPMC_x000D_ Added journal title from EUPMC_x000D_ Added issn from EUPMC_x000D_ Added eissn from EUPMC_x000D_ Added grants data from EUPMC_x000D_ Added date of publication from EUPMC_x000D_ Added electronic publication date from EUPMC_x000D_ Checking if XML is available from EUPMC (since 6th March 20…		3100	GBP	3100		None	3100		CC BY		Unknown
Birmingham	PMC6635887	31354532	10.3389/fphys.2019.00901	Diurnal variations in endothelial function are influenced by habitual wake up time	Frontiers in physiology	TRUE	1664-042X	1664-042X	2019-01-01T00:00:00Z	2019-07-10T00:00:00Z	Frontiers Media SA	not applicable	cc-by	cc-by	epmc_api	epmc_api	TRUE	TRUE	FALSE	TRUE	TRUE	TRUE	Added PMCID from EUPMC_x000D_ Added PMID from EUPMC_x000D_ Confirmed fulltext is in EUPMC_x000D_ Confirmed is open access from EUPMC_x000D_ Added journal title from EUPMC_x000D_ Added issn from EUPMC_x000D_ Added eissn from EUPMC_x000D_ Added grants data from EUPMC_x000D_ Added date of publication from EUPMC_x000D_ Added electronic publication date from EUPMC_x000D_ Checking if XML is available f…		1757.5	USD	1691.35		Institutional_Prepayment	0	1691.35	CC BY	Frontiers Prepay Account	Unknown
Birmingham	PMC6767686	31328796	10.1113/JP278528	Exercise - not as hot as you think	The Journal of physiology	FALSE	0022-3751, 1469-7793	1469-7793	2019-09-01T00:00:00Z	2019-08-06T00:00:00Z	Wiley	not applicable	cc-by	cc-by	epmc_api	epmc_api	TRUE	TRUE	FALSE	TRUE	TRUE	TRUE	Added PMCID from EUPMC_x000D_ Confirmed fulltext is in EUPMC_x000D_ Confirmed is open access from EUPMC_x000D_ Added journal title from EUPMC_x000D_ Added issn from EUPMC_x000D_ Added eissn from EUPMC_x000D_ Added grants data from EUPMC_x000D_ Added date of publication from EUPMC_x000D_ Added electronic publication date from EUPMC_x000D_ Checking if XML is available from EUPMC (since 6th March 20…		1974.75	GBP	2369.7		Institutional_Prepayment	2369.7		CC BY	Wiley OAPA	Unknown
Birmingham	PMC6852297	31287944	10.1111/febs.14985	C-type lectin domain group 14 proteins in vascular biology, cancer and inflammation	The FEBS journal	FALSE	1742-464X, 1742-4658	1742-4658	2019-09-01T00:00:00Z	2019-07-29T00:00:00Z	Wiley	not applicable	cc-by	cc-by	epmc_api	epmc_api	TRUE	TRUE	FALSE	TRUE	TRUE	TRUE	Added PMCID from EUPMC_x000D_ Confirmed fulltext is in EUPMC_x000D_ Confirmed is open access from EUPMC_x000D_ Added journal title from EUPMC_x000D_ Added issn from EUPMC_x000D_ Added eissn from EUPMC_x000D_ Added grants data from EUPMC_x000D_ Added date of publication from EUPMC_x000D_ Added electronic publication date from EUPMC_x000D_ Checking if XML is available from EUPMC (since 6th March 20…		1900.5	GBP	2280.6		Institutional_Prepayment	2280.6		CC BY	Wiley OAPA	Unknown
Birmingham	PMC6593073	31275945	10.3389/fcvm.2019.00080	Inherited thrombocytopenia: Update on genes and genetic variants associated with bleeding	Frontiers in Cardiovascular Medicine	TRUE	2297-055X	2297-055X	2019-01-01T00:00:00Z	2019-06-19T00:00:00Z	Frontiers Media SA	not applicable	cc-by	cc-by	epmc_api	epmc_api	TRUE	TRUE	FALSE	TRUE	TRUE	TRUE	Added PMCID from EUPMC_x000D_ Confirmed fulltext is in EUPMC_x000D_ Confirmed is open access from EUPMC_x000D_ Added journal title from EUPMC_x000D_ Added issn from EUPMC_x000D_ Added eissn from EUPMC_x000D_ Added grants data from EUPMC_x000D_ Added date of publication from EUPMC_x000D_ Added electronic publication date from EUPMC_x000D_ Checking if XML is available from EUPMC (since 6th March 20…		831.25	USD	897.43		Institutional_Prepayment	897.43		CC BY	Frontiers Prepay Account	Unknown
Birmingham	PMC6767854	31240719	10.1113/JP277899	Using optically pumped magnetometers to measure magnetoencephalographic signals in the human cerebellum	The Journal of physiology	FALSE	0022-3751, 1469-7793	1469-7793	2019-08-01T00:00:00Z	2019-07-18T00:00:00Z	Wiley	not applicable	cc-by	cc-by	epmc_api	epmc_api	TRUE	TRUE	FALSE	TRUE	TRUE	TRUE	Added PMCID from EUPMC_x000D_ Confirmed fulltext is in EUPMC_x000D_ Confirmed is open access from EUPMC_x000D_ Added journal title from EUPMC_x000D_ Added issn from EUPMC_x000D_ Added eissn from EUPMC_x000D_ Added grants data from EUPMC_x000D_ Added date of publication from EUPMC_x000D_ Added electronic publication date from EUPMC_x000D_ Checking if XML is available from EUPMC (since 6th March 20…		1974.75	GBP	2369.7		Institutional_Prepayment	0	2369.7	CC BY	Wiley OAPA	Unknown
Birmingham	PMC6711343	31239278	10.1136/heartjnl-2019-315138	Coronary microvascular dysfunction: a key step in the development of uraemic cardiomyopathy?	Heart (British Cardiac Society)	FALSE	1355-6037, 1468-201X	1468-201X	2019-09-01T00:00:00Z	2019-06-25T00:00:00Z	BMJ	not applicable	cc-by	cc-by	epmc_api	epmc_api	TRUE	TRUE	FALSE	TRUE	TRUE	TRUE	Added PMCID from EUPMC_x000D_ Confirmed fulltext is in EUPMC_x000D_ Confirmed is open access from EUPMC_x000D_ Added journal title from EUPMC_x000D_ Added issn from EUPMC_x000D_ Added eissn from EUPMC_x000D_ Added grants data from EUPMC_x000D_ Added date of publication from EUPMC_x000D_ Added electronic publication date from EUPMC_x000D_ Checking if XML is available from EUPMC (since 6th March 20…		1657.5	GBP	1989		Institutional_Prepayment	1989		CC BY	BMJ OA Account	Unknown
Birmingham	Unknown	31233017	10.3791/59663	High-throughput analysis of optical mapping data using an open source software ElectroMap	Journal of visualized experiments : JoVE	FALSE	1940-087X	1940-087X	2019-06-01T00:00:00Z	2019-06-04T00:00:00Z	MyJove Corporation	Unknown	Unknown	Unknown	Unknown	Unknown	FALSE	FALSE	FALSE	FALSE	FALSE	FALSE	This article is not open access according to EUPMC, but since 6th March 2020 we take this to mean only that the publisher did not indicate to EUPMC that it can be included in their Open Access subset - it may well still be an OA article._x000D_ Added journal title from EUPMC_x000D_ Added issn from EUPMC_x000D_ Added eissn from EUPMC_x000D_ Added date of publication from EUPMC_x000D_ Added electro…		4200	USD	3908.25		None	3908.25		CC BY		FALSE
Birmingham	PMC6568211	31231365	10.3389/fimmu.2019.01150	Classical and non-classical presentations of complement factor I deficiency diagnosed via genetic and genomic methods	Frontiers in immunology	TRUE	1664-3224	1664-3224	2019-01-01T00:00:00Z	2019-06-07T00:00:00Z	Frontiers Media SA	not applicable	cc-by	cc-by	epmc_api	epmc_api	TRUE	TRUE	FALSE	TRUE	TRUE	TRUE	Added PMCID from EUPMC_x000D_ Confirmed fulltext is in EUPMC_x000D_ Confirmed is open access from EUPMC_x000D_ Added journal title from EUPMC_x000D_ Added issn from EUPMC_x000D_ Added eissn from EUPMC_x000D_ Added grants data from EUPMC_x000D_ Added date of publication from EUPMC_x000D_ Added electronic publication date from EUPMC_x000D_ Checking if XML is available from EUPMC (since 6th March 20…		1757.5	USD	1691.35		Institutional_Prepayment	1691.35		CC BY	Frontiers Prepay Account	Unknown
Birmingham	PMC6772007	31216061	10.1002/bjs.11204	Mechanisms of immunogenicity in colorectal cancer	The British journal of surgery	FALSE	0007-1323, 1365-2168	1365-2168	2019-09-01T00:00:00Z	2019-06-19T00:00:00Z	Wiley	not applicable	cc-by	cc-by	epmc_api	epmc_api	TRUE	TRUE	FALSE	TRUE	TRUE	TRUE	Added PMCID from EUPMC_x000D_ Confirmed fulltext is in EUPMC_x000D_ Confirmed is open access from EUPMC_x000D_ Added journal title from EUPMC_x000D_ Added issn from EUPMC_x000D_ Added eissn from EUPMC_x000D_ Added grants data from EUPMC_x000D_ Added date of publication from EUPMC_x000D_ Added electronic publication date from EUPMC_x000D_ Checking if XML is available from EUPMC (since 6th March 20…		2137.5	GBP	2565		Institutional_Prepayment	2565		CC BY	Wiley OAPA	Unknown
Birmingham	PMC6567624	31196202	10.1186/s12910-019-0377-7	Mention of ethical review and informed consent in the reports of research undertaken during the armed conflict in Darfur (2004-2012): a systematic review	BMC medical ethics	TRUE	1472-6939	1472-6939	2019-06-01T00:00:00Z	2019-06-13T00:00:00Z	Springer Science and Business Media LLC	not applicable	cc-by	cc-by	epmc_api	epmc_api	TRUE	TRUE	FALSE	TRUE	TRUE	TRUE	Added PMCID from EUPMC_x000D_ Confirmed fulltext is in EUPMC_x000D_ Confirmed is open access from EUPMC_x000D_ Added journal title from EUPMC_x000D_ Added issn from EUPMC_x000D_ Added eissn from EUPMC_x000D_ Added grants data from EUPMC_x000D_ Added date of publication from EUPMC_x000D_ Added electronic publication date from EUPMC_x000D_ Checking if XML is available from EUPMC (since 6th March 20…		1164.5	GBP	1397.4		Institutional_Prepayment	1397.4		CC BY	BMC Prepay Account	Unknown
Birmingham	PMC6528378	31113362	10.1186/s12872-019-1105-4	Development and external validation of predictive models for prevalent and recurrent atrial fibrillation: A protocol for the analysis of the CATCH ME combined dataset	BMC cardiovascular disorders	TRUE	1471-2261	1471-2261	2019-05-01T00:00:00Z	2019-05-21T00:00:00Z	Springer Science and Business Media LLC	not applicable	cc-by	cc-by	epmc_api	epmc_api	TRUE	TRUE	FALSE	TRUE	TRUE	TRUE	Added PMCID from EUPMC_x000D_ Confirmed fulltext is in EUPMC_x000D_ Confirmed is open access from EUPMC_x000D_ Added journal title from EUPMC_x000D_ Added issn from EUPMC_x000D_ Added eissn from EUPMC_x000D_ Added grants data from EUPMC_x000D_ Added date of publication from EUPMC_x000D_ Added electronic publication date from EUPMC_x000D_ Checking if XML is available from EUPMC (since 6th March 20…		1334.5	GBP	1601.4		Institutional_Prepayment	1601.4		CC BY	BMC Prepay Account	Unknown
Birmingham	PMC6642865	31107965	10.1111/cei.13329	Metabolism at the centre of the hostÂ–microbe relationship	Clinical and experimental immunology	FALSE	0009-9104, 1365-2249	1365-2249	2019-08-01T00:00:00Z	2019-06-07T00:00:00Z	Wiley	not applicable	cc-by	cc-by	epmc_api	epmc_api	TRUE	TRUE	FALSE	TRUE	TRUE	TRUE	Added PMCID from EUPMC_x000D_ Confirmed fulltext is in EUPMC_x000D_ Confirmed is open access from EUPMC_x000D_ Added journal title from EUPMC_x000D_ Added issn from EUPMC_x000D_ Added eissn from EUPMC_x000D_ Added grants data from EUPMC_x000D_ Added date of publication from EUPMC_x000D_ Added electronic publication date from EUPMC_x000D_ Checking if XML is available from EUPMC (since 6th March 20…		1500	GBP	1800		Institutional_Prepayment	1800		CC BY	Wiley OAPA	Unknown
Birmingham	PMC6503915	31098021	10.1107/S2052252519002926	Determination of the Molecular Basis for Coprogen Import by Gram Negative Bacteria	IUCrJ	TRUE	2052-2525	2052-2525	2019-05-01T00:00:00Z	2019-04-05T00:00:00Z	International Union of Crystallography (IUCr)	not applicable	cc-by	cc-by	epmc_api	epmc_api	TRUE	TRUE	FALSE	TRUE	TRUE	TRUE	Added PMCID from EUPMC_x000D_ Confirmed fulltext is in EUPMC_x000D_ Confirmed is open access from EUPMC_x000D_ Added journal title from EUPMC_x000D_ Added issn from EUPMC_x000D_ Added eissn from EUPMC_x000D_ Added grants data from EUPMC_x000D_ Added date of publication from EUPMC_x000D_ Added electronic publication date from EUPMC_x000D_ Checking if XML is available from EUPMC (since 6th March 20…		1500	USD	1642.96		None	1642.96		CC BY		Unknown
Birmingham	PMC6887546	31097785	10.1038/s41375-019-0478-9	SPHINGOSINE-1-PHOSPHATE SIGNALLING DRIVES AN ANGIOGENIC TRANSCRIPTIONAL PROGRAMME IN DIFFUSE LARGE B CELL LYMPHOMA	Leukemia	FALSE	0887-6924, 1476-5551	1476-5551	2019-12-01T00:00:00Z	2019-05-16T00:00:00Z	Springer Science and Business Media LLC	cc-by	cc-by	non-standard-licence	publisher_splash_page	epmc_xml_permissions	TRUE	TRUE	FALSE	TRUE	FALSE	FALSE	Added PMCID from EUPMC_x000D_ Confirmed fulltext is in EUPMC_x000D_ Confirmed is open access from EUPMC_x000D_ Added journal title from EUPMC_x000D_ Added issn from EUPMC_x000D_ Added eissn from EUPMC_x000D_ Added grants data from EUPMC_x000D_ Added date of publication from EUPMC_x000D_ Added electronic publication date from EUPMC_x000D_ Checking if XML is available from EUPMC (since 6th March 20…		2980	GBP	3576		None	3576		CC BY		Unknown
Birmingham	PMC6772022	31077629	10.1111/bju.14808	Targeted deep sequencing of urothelial bladder cancers and associated urinary DNA: a 23-gene panel with utility for non-invasive diagnosis and risk stratification	BJU international	FALSE	1464-4096, 1464-410X	1464-410X	2019-09-01T00:00:00Z	2019-06-19T00:00:00Z	Wiley	not applicable	cc-by	cc-by	epmc_api	epmc_api	TRUE	TRUE	FALSE	TRUE	TRUE	TRUE	Added PMCID from EUPMC_x000D_ Confirmed fulltext is in EUPMC_x000D_ Confirmed is open access from EUPMC_x000D_ Added journal title from EUPMC_x000D_ Added issn from EUPMC_x000D_ Added eissn from EUPMC_x000D_ Added grants data from EUPMC_x000D_ Added date of publication from EUPMC_x000D_ Added electronic publication date from EUPMC_x000D_ Checking if XML is available from EUPMC (since 6th March 20…		1500	GBP	1800		Institutional_Prepayment	1800		CC BY	Wiley OAPA	Unknown
Birmingham	PMC6771789	31077410	10.1002/pd.5475	MicroRNA changes in maternal serum from pregnancies complicated by twin-twin transfusion syndrome: a discovery study	Prenatal diagnosis	FALSE	0197-3851, 1097-0223	1097-0223	2019-07-01T00:00:00Z	2019-06-18T00:00:00Z	Wiley	not applicable	cc-by	cc-by	epmc_api	epmc_api	TRUE	TRUE	FALSE	TRUE	TRUE	TRUE	Added PMCID from EUPMC_x000D_ Confirmed fulltext is in EUPMC_x000D_ Confirmed is open access from EUPMC_x000D_ Added journal title from EUPMC_x000D_ Added issn from EUPMC_x000D_ Added eissn from EUPMC_x000D_ Added grants data from EUPMC_x000D_ Added date of publication from EUPMC_x000D_ Added electronic publication date from EUPMC_x000D_ Checking if XML is available from EUPMC (since 6th March 20…		2100	GBP	2520		Institutional_Prepayment	2520		CC BY	Wiley OAPA	Unknown
Birmingham	PMC6656693	31071367	10.1016/j.jhep.2019.04.011	Outcomes of Liver Transplantation for Non-alcoholic Steatohepatitis: a European Liver Transplant Registry Study	Journal of hepatology	FALSE	0168-8278, 1600-0641	1600-0641	2019-08-01T00:00:00Z	2019-05-07T00:00:00Z	Elsevier BV	not applicable	cc-by	cc-by	epmc_api	epmc_api	TRUE	TRUE	FALSE	TRUE	TRUE	TRUE	Added PMCID from EUPMC_x000D_ Confirmed fulltext is in EUPMC_x000D_ Confirmed is open access from EUPMC_x000D_ Added journal title from EUPMC_x000D_ Added issn from EUPMC_x000D_ Added eissn from EUPMC_x000D_ Added date of publication from EUPMC_x000D_ Added electronic publication date from EUPMC_x000D_ Checking if XML is available from EUPMC (since 6th March 2020 this is always done for any artic…		2590	EUR	2900.25		None	2900.25		CC BY		Unknown
Birmingham	PMC6803816	31062860	10.1093/cvr/cvz118	Imaging the injured beating heart intravitally and the vasculoprotection afforded by haematopoietic stem cells	Cardiovascular research	FALSE	0008-6363, 1755-3245	1755-3245	2019-11-01T00:00:00Z	Unknown	Oxford University Press (OUP)	not applicable	cc-by	cc-by	epmc_api	epmc_api	TRUE	TRUE	FALSE	TRUE	TRUE	TRUE	Added PMCID from EUPMC_x000D_ Confirmed fulltext is in EUPMC_x000D_ Confirmed is open access from EUPMC_x000D_ Added journal title from EUPMC_x000D_ Added issn from EUPMC_x000D_ Added eissn from EUPMC_x000D_ Added grants data from EUPMC_x000D_ Added date of publication from EUPMC_x000D_ Checking if XML is available from EUPMC (since 6th March 2020 this is always done for any article we have a PMC…		2258	GBP	2709.6		None	2709.6		CC BY		Unknown
Birmingham	PMC6618122	31062466	10.1111/hel.12587	Complete genome sequence of Helicobacter pylori B128 7.13 and generation of unmarked mutations using a novel single-step method	Helicobacter	FALSE	1083-4389, 1523-5378	1523-5378	2019-08-01T00:00:00Z	2019-05-07T00:00:00Z	Wiley	not applicable	cc-by	cc-by	epmc_api	epmc_api	TRUE	TRUE	FALSE	TRUE	TRUE	TRUE	Added PMCID from EUPMC_x000D_ Confirmed fulltext is in EUPMC_x000D_ Confirmed is open access from EUPMC_x000D_ Added journal title from EUPMC_x000D_ Added issn from EUPMC_x000D_ Added eissn from EUPMC_x000D_ Added grants data from EUPMC_x000D_ Added date of publication from EUPMC_x000D_ Added electronic publication date from EUPMC_x000D_ Checking if XML is available from EUPMC (since 6th March 20…		1500	GBP	1800		Institutional_Prepayment	1800		CC BY	Wiley OAPA	Unknown
Birmingham	PMC6497229	31048903	10.1371/journal.pcbi.1006395	Balance of mechanical forces drives endothelial gap formation and may facilitate cancer and immune-cell extravasation	PLoS computational biology	TRUE	1553-734X, 1553-7358	1553-7358	2019-05-01T00:00:00Z	2019-05-02T00:00:00Z	Public Library of Science (PLoS)	not applicable	cc-by	cc-by	epmc_api	epmc_api	TRUE	TRUE	FALSE	TRUE	TRUE	TRUE	Added PMCID from EUPMC_x000D_ Added PMID from EUPMC_x000D_ Added DOI from EUPMC_x000D_ Confirmed fulltext is in EUPMC_x000D_ Confirmed is open access from EUPMC_x000D_ Added journal title from EUPMC_x000D_ Added issn from EUPMC_x000D_ Added eissn from EUPMC_x000D_ Added grants data from EUPMC_x000D_ Added date of publication from EUPMC_x000D_ Added electronic publication date from EUPMC_x000D_ Ch…		2350	USD	2448.18		Institutional_Prepayment	2448.18		CC BY	PLOS Institutional Deposit Account	Unknown
Birmingham	PMC6544897	31039693	10.1098/rsif.2018.0344	Excitatory versus inhibitory feedback in Bayesian formulations of scene construction	Journal of the Royal Society, Interface	FALSE	1742-5689, 1742-5662	1742-5662	2019-05-01T00:00:00Z	Unknown	The Royal Society	not applicable	cc-by	cc-by	epmc_api	epmc_api	TRUE	TRUE	FALSE	TRUE	TRUE	TRUE	Added PMCID from EUPMC_x000D_ Confirmed fulltext is in EUPMC_x000D_ Confirmed is open access from EUPMC_x000D_ Added journal title from EUPMC_x000D_ Added issn from EUPMC_x000D_ Added eissn from EUPMC_x000D_ Added grants data from EUPMC_x000D_ Added date of publication from EUPMC_x000D_ Checking if XML is available from EUPMC (since 6th March 2020 this is always done for any article we have a PMC…		1530	GBP	1836		Institutional_Prepayment	1836		CC BY	RS OA membership	Unknown
Birmingham	PMC6501899	30955493	10.1098/rstb.2018.0289	Modelling human papillomavirus biology in oropharyngeal keratinocytes	Philosophical transactions of the Royal Society of London. Series B, Biological sciences	FALSE	0962-8436, 1471-2970	1471-2970	2019-05-01T00:00:00Z	Unknown	The Royal Society	not applicable	cc-by	cc-by	epmc_api	epmc_api	TRUE	TRUE	FALSE	TRUE	TRUE	TRUE	Added PMCID from EUPMC_x000D_ Confirmed fulltext is in EUPMC_x000D_ Confirmed is open access from EUPMC_x000D_ Added journal title from EUPMC_x000D_ Added issn from EUPMC_x000D_ Added eissn from EUPMC_x000D_ Added grants data from EUPMC_x000D_ Added date of publication from EUPMC_x000D_ Checking if XML is available from EUPMC (since 6th March 2020 this is always done for any article we have a PMC…		1530	GBP	1836		Institutional_Prepayment	0	1836	CC BY	RS OA membership	Unknown
Birmingham	PMC6447634	30944325	10.1038/s41467-019-09558-3	Recollection in the human hippocampal-entorhinal cell circuitry	Nature communications	TRUE	2041-1723	2041-1723	2019-04-01T00:00:00Z	2019-04-03T00:00:00Z	Springer Science and Business Media LLC	not applicable	cc-by	cc-by	epmc_api	epmc_api	TRUE	TRUE	FALSE	TRUE	TRUE	TRUE	Added PMCID from EUPMC_x000D_ Confirmed fulltext is in EUPMC_x000D_ Confirmed is open access from EUPMC_x000D_ Added journal title from EUPMC_x000D_ Added issn from EUPMC_x000D_ Added eissn from EUPMC_x000D_ Added date of publication from EUPMC_x000D_ Added electronic publication date from EUPMC_x000D_ Checking if XML is available from EUPMC (since 6th March 2020 this is always done for any artic…		3490	GBP	4188		None	4188		CC BY		Unknown
Birmingham	PMC6428734	30930902	10.3389/fimmu.2019.00468	CD117 (c-Kit) is Expressed During CD8+ T Cell Priming and Stratifies Sensitivity to Apoptosis According to Strength of TCR Engagement	Frontiers in immunology	TRUE	1664-3224	1664-3224	2019-01-01T00:00:00Z	2019-03-15T00:00:00Z	Frontiers Media SA	not applicable	cc-by	cc-by	epmc_api	epmc_api	TRUE	TRUE	FALSE	TRUE	TRUE	TRUE	Added PMCID from EUPMC_x000D_ Confirmed fulltext is in EUPMC_x000D_ Confirmed is open access from EUPMC_x000D_ Added journal title from EUPMC_x000D_ Added issn from EUPMC_x000D_ Added eissn from EUPMC_x000D_ Added grants data from EUPMC_x000D_ Added date of publication from EUPMC_x000D_ Added electronic publication date from EUPMC_x000D_ Checking if XML is available from EUPMC (since 6th March 20…		2802.5	USD	2558		Institutional_Prepayment	0	2558	CC BY	Frontiers Prepay Account	Unknown
Birmingham	PMC6547046	30930309	10.1016/j.neuroimage.2019.03.056	Probing cortical excitability using rapid frequency tagging	NeuroImage	FALSE	1053-8119, 1095-9572	1095-9572	2019-07-01T00:00:00Z	2019-03-28T00:00:00Z	Elsevier BV	not applicable	cc-by	cc-by	epmc_api	epmc_api	TRUE	TRUE	FALSE	TRUE	TRUE	TRUE	Added PMCID from EUPMC_x000D_ Confirmed fulltext is in EUPMC_x000D_ Confirmed is open access from EUPMC_x000D_ Added journal title from EUPMC_x000D_ Added issn from EUPMC_x000D_ Added eissn from EUPMC_x000D_ Added grants data from EUPMC_x000D_ Added date of publication from EUPMC_x000D_ Added electronic publication date from EUPMC_x000D_ Checking if XML is available from EUPMC (since 6th March 20…		2590	EUR	2677.24		None	2677.24		CC BY		Unknown
Birmingham	PMC6432979	30909165	10.1530/EDM-18-0151	Double Trouble Â– two cases of dual pathologies in one adrenal mass	Endocrinology, diabetes & metabolism case reports	TRUE	2052-0573	2052-0573	2019-03-01T00:00:00Z	2019-03-23T00:00:00Z	Bioscientifica	not applicable	cc-by	cc-by	epmc_api	epmc_api	TRUE	TRUE	FALSE	TRUE	TRUE	TRUE	Added PMCID from EUPMC_x000D_ Confirmed fulltext is in EUPMC_x000D_ Confirmed is open access from EUPMC_x000D_ Added journal title from EUPMC_x000D_ Added issn from EUPMC_x000D_ Added eissn from EUPMC_x000D_ Added date of publication from EUPMC_x000D_ Added electronic publication date from EUPMC_x000D_ Checking if XML is available from EUPMC (since 6th March 2020 this is always done for any artic…		598.8	GBP	598.8		None	598.8		CC BY		Unknown
Birmingham	PMC6447362	30907728	10.7554/eLife.41444	The RNA helicase UPF1 associates with mRNAs co-transcriptionally and is required for the release of mRNAs from gene loci	eLife	TRUE	2050-084X	2050-084X	2019-03-01T00:00:00Z	2019-03-25T00:00:00Z	eLife Sciences Publications, Ltd	not applicable	cc-by	cc-by	epmc_api	epmc_api	TRUE	TRUE	FALSE	TRUE	TRUE	TRUE	Added PMCID from EUPMC_x000D_ Confirmed fulltext is in EUPMC_x000D_ Confirmed is open access from EUPMC_x000D_ Added journal title from EUPMC_x000D_ Added issn from EUPMC_x000D_ Added eissn from EUPMC_x000D_ Added grants data from EUPMC_x000D_ Added date of publication from EUPMC_x000D_ Added electronic publication date from EUPMC_x000D_ Checking if XML is available from EUPMC (since 6th March 20…		2500	USD	2370.17		None	0	2370.17	CC BY		Unknown
Birmingham	PMC6416196	30899227	10.3389/fphys.2019.00182	Cardiac optogenetics and optical mapping Â– Overcoming spectral congestion in all-optical cardiac electrophysiology	Frontiers in Physiology	TRUE	1664-042X	1664-042X	2019-01-01T00:00:00Z	2019-03-07T00:00:00Z	Frontiers Media SA	not applicable	cc-by	cc-by	epmc_api	epmc_api	TRUE	TRUE	FALSE	TRUE	TRUE	TRUE	Added PMCID from EUPMC_x000D_ Confirmed fulltext is in EUPMC_x000D_ Confirmed is open access from EUPMC_x000D_ Added journal title from EUPMC_x000D_ Added issn from EUPMC_x000D_ Added eissn from EUPMC_x000D_ Added grants data from EUPMC_x000D_ Added date of publication from EUPMC_x000D_ Added electronic publication date from EUPMC_x000D_ Checking if XML is available from EUPMC (since 6th March 20…		2802.5	USD	2558		Institutional_Prepayment	2558		CC BY	Frontiers Prepay Account	Unknown
Birmingham	PMC6425657	30894192	10.1186/s12984-019-0513-0	Boosting robot-assisted rehabilitation of stroke hemiparesis by individualized selection of upper limb movements - a pilot study	Journal of neuroengineering and rehabilitation	TRUE	1743-0003	1743-0003	2019-03-01T00:00:00Z	2019-03-20T00:00:00Z	Springer Science and Business Media LLC	not applicable	cc-by	cc-by	epmc_api	epmc_api	TRUE	TRUE	FALSE	TRUE	TRUE	TRUE	Added PMCID from EUPMC_x000D_ Confirmed fulltext is in EUPMC_x000D_ Confirmed is open access from EUPMC_x000D_ Added journal title from EUPMC_x000D_ Added issn from EUPMC_x000D_ Added eissn from EUPMC_x000D_ Added grants data from EUPMC_x000D_ Added date of publication from EUPMC_x000D_ Added electronic publication date from EUPMC_x000D_ Checking if XML is available from EUPMC (since 6th March 20…		1215.5	GBP	1458.6		Institutional_Prepayment	0	1458.6	CC BY	BMC Prepay Account	Unknown
Birmingham	PMC6407428	30881306	10.3389/fphar.2019.00184	Triggering the resolution of immune mediated inflammatory diseases: Can targeting leukocyte migration be the answer?	Frontiers in Pharmacology	TRUE	1663-9812	1663-9812	2019-01-01T00:00:00Z	2019-03-01T00:00:00Z	Frontiers Media SA	not applicable	cc-by	cc-by	epmc_api	epmc_api	TRUE	TRUE	FALSE	TRUE	TRUE	TRUE	Added PMCID from EUPMC_x000D_ Confirmed fulltext is in EUPMC_x000D_ Confirmed is open access from EUPMC_x000D_ Added journal title from EUPMC_x000D_ Added issn from EUPMC_x000D_ Added eissn from EUPMC_x000D_ Added grants data from EUPMC_x000D_ Added date of publication from EUPMC_x000D_ Added electronic publication date from EUPMC_x000D_ Checking if XML is available from EUPMC (since 6th March 20…		1092.5	USD	997.188		Institutional_Prepayment	0	997.188	CC BY	Frontiers Prepay Account	Unknown
Birmingham	PMC6478369	30880378	10.1021/acsami.9b00420	Tuneable Metamaterial-like Platforms for Surface Enhanced Raman Scattering via Three-Dimensional Block Copolymer Based Nanoarchitectures	ACS applied materials & interfaces	FALSE	1944-8244, 1944-8252	1944-8252	2019-04-01T00:00:00Z	2019-04-05T00:00:00Z	American Chemical Society (ACS)	not applicable	cc-by	cc-by	epmc_xml_permissions	epmc_xml_permissions	TRUE	TRUE	FALSE	TRUE	TRUE	TRUE	Added PMCID from EUPMC_x000D_ Confirmed fulltext is in EUPMC_x000D_ Confirmed is open access from EUPMC_x000D_ Added journal title from EUPMC_x000D_ Added issn from EUPMC_x000D_ Added eissn from EUPMC_x000D_ Added grants data from EUPMC_x000D_ Added date of publication from EUPMC_x000D_ Added electronic publication date from EUPMC_x000D_ Checking if XML is available from EUPMC (since 6th March 20…		4000	USD	3686.06		None	3686.06		CC BY		Unknown
Birmingham	PMC6421631	30877232	10.26508/lsa.201800207	Dependence on Myb expression is attenuated in myeloid leukaemia with N-terminal CEBPA mutations	Life science alliance	TRUE	2575-1077	2575-1077	2019-04-01T00:00:00Z	2019-03-15T00:00:00Z	Life Science Alliance, LLC	not applicable	cc-by	cc-by	epmc_api	epmc_api	TRUE	TRUE	FALSE	TRUE	TRUE	TRUE	Added PMCID from EUPMC_x000D_ Confirmed fulltext is in EUPMC_x000D_ Confirmed is open access from EUPMC_x000D_ Added journal title from EUPMC_x000D_ Added issn from EUPMC_x000D_ Added eissn from EUPMC_x000D_ Added grants data from EUPMC_x000D_ Added date of publication from EUPMC_x000D_ Added electronic publication date from EUPMC_x000D_ Checking if XML is available from EUPMC (since 6th March 20…		2400	USD	2211.64		None	2211.64		CC BY		Unknown
Birmingham	PMC6411139	30856207	10.1371/journal.pone.0213162	Tify: a quality-based frame selection tool for improving the output of unstable biomedical imaging	PloS one	TRUE	1932-6203	1932-6203	2019-01-01T00:00:00Z	2019-03-11T00:00:00Z	Public Library of Science (PLoS)	not applicable	cc-by	cc-by	epmc_api	epmc_api	TRUE	TRUE	FALSE	TRUE	TRUE	TRUE	Added PMCID from EUPMC_x000D_ Confirmed fulltext is in EUPMC_x000D_ Confirmed is open access from EUPMC_x000D_ Added journal title from EUPMC_x000D_ Added issn from EUPMC_x000D_ Added eissn from EUPMC_x000D_ Added grants data from EUPMC_x000D_ Added date of publication from EUPMC_x000D_ Added electronic publication date from EUPMC_x000D_ Checking if XML is available from EUPMC (since 6th March 20…		1595	USD	1518.28		Institutional_Prepayment	1518.28		CC BY	PLOS Institutional Deposit Account	Unknown
Birmingham	PMC7034533	30849265	10.1080/09537104.2019.1585526	Comparison of the GPVI inhibitors losartan and honokiol	Platelets	FALSE	0953-7104, 1369-1635	1369-1635	2020-01-01T00:00:00Z	2019-03-08T00:00:00Z	Informa UK Limited	Unknown	cc-by	cc-by	epmc_api	epmc_api	FALSE	FALSE	FALSE	FALSE	FALSE	FALSE	This article is not open access according to EUPMC, but since 6th March 2020 we take this to mean only that the publisher did not indicate to EUPMC that it can be included in their Open Access subset - it may well still be an OA article._x000D_ Added journal title from EUPMC_x000D_ Added issn from EUPMC_x000D_ Added eissn from EUPMC_x000D_ Added grants data from EUPMC_x000D_ Added date of publica…		1695.75	GBP	2034.9		JiscCollections_Taylor & Francis	2034.9		CC BY		FALSE
Birmingham	PMC6618030	30821045	10.1002/lt.25439	Manipulation of lipid metabolism during normothermic machine perfusion: Effect of defatting therapies on donor liver functional recovery	Liver transplantation : official publication of the American Association for the Study of Liver Diseases and the International Liver Transplantation Society	FALSE	1527-6465, 1527-6473	1527-6473	2019-07-01T00:00:00Z	Unknown	Wiley	not applicable	cc-by	cc-by	epmc_api	epmc_api	TRUE	TRUE	FALSE	TRUE	TRUE	TRUE	Added PMCID from EUPMC_x000D_ Confirmed fulltext is in EUPMC_x000D_ Confirmed is open access from EUPMC_x000D_ Added journal title from EUPMC_x000D_ Added issn from EUPMC_x000D_ Added eissn from EUPMC_x000D_ Added grants data from EUPMC_x000D_ Added date of publication from EUPMC_x000D_ Checking if XML is available from EUPMC (since 6th March 2020 this is always done for any article we have a PMC…		825	GBP	990		Institutional_Prepayment	990		CC BY	Wiley OAPA	Unknown
Birmingham	PMC6864596	30808575	10.1016/j.clinre.2019.01.005	Clinical presentations of Hepatitis E: a clinical review with representative case histories	Clinics and research in hepatology and gastroenterology	FALSE	2210-7401, 2210-741X	2210-741X	2019-11-01T00:00:00Z	2019-02-23T00:00:00Z	Elsevier BV	not applicable	cc-by	cc-by	epmc_api	epmc_api	TRUE	TRUE	FALSE	TRUE	TRUE	TRUE	Added PMCID from EUPMC_x000D_ Confirmed fulltext is in EUPMC_x000D_ Confirmed is open access from EUPMC_x000D_ Added journal title from EUPMC_x000D_ Added issn from EUPMC_x000D_ Added eissn from EUPMC_x000D_ Added grants data from EUPMC_x000D_ Added date of publication from EUPMC_x000D_ Added electronic publication date from EUPMC_x000D_ Checking if XML is available from EUPMC (since 6th March 20…		2000	EUR	2068.25		None	2068.25		CC BY		Unknown
Birmingham	PMC6494975	30797674	10.1016/S1470-2045(18)30903-3	Risk of subsequent primary neoplasms in survivors of adolescent and young adult cancer (Teenage and Young Adult Cancer Survivor Study): a population-based, cohort study	The Lancet. Oncology	FALSE	1470-2045, 1474-5488	1474-5488	2019-04-01T00:00:00Z	2019-02-21T00:00:00Z	Elsevier BV	not applicable	cc-by	cc-by	epmc_api	epmc_api	TRUE	FALSE	FALSE	FALSE	TRUE	FALSE	Added PMCID from EUPMC_x000D_ Confirmed fulltext is in EUPMC_x000D_ This article is not open access according to EUPMC, but since 6th March 2020 we take this to mean only that the publisher did not indicate to EUPMC that it can be included in their Open Access subset - it may well still be an OA article._x000D_ Added journal title from EUPMC_x000D_ Added issn from EUPMC_x000D_ Added eissn from EU…		4312.2	EUR	4838.92		None	4838.92		CC BY		Unknown
Birmingham	PMC6385278	30792403	10.1038/s41598-018-37525-3	A framework for tracer-based metabolism in mammalian cells by NMR	Scientific reports	TRUE	2045-2322	2045-2322	2019-02-01T00:00:00Z	2019-02-21T00:00:00Z	Springer Science and Business Media LLC	not applicable	cc-by	cc-by	epmc_api	epmc_api	TRUE	TRUE	FALSE	TRUE	TRUE	TRUE	Added PMCID from EUPMC_x000D_ Confirmed fulltext is in EUPMC_x000D_ Confirmed is open access from EUPMC_x000D_ Added journal title from EUPMC_x000D_ Added issn from EUPMC_x000D_ Added eissn from EUPMC_x000D_ Added grants data from EUPMC_x000D_ Added date of publication from EUPMC_x000D_ Added electronic publication date from EUPMC_x000D_ Checking if XML is available from EUPMC (since 6th March 20…		1165	GBP	1398		None	1398		CC BY		Unknown
Birmingham	Unknown	30782970	10.1042/bcj20180828	Structure of SPH (Self-Incompatibility Protein Homologue) proteins, a widespread family of small, highly stable, secreted proteins	The Biochemical journal	FALSE	0264-6021, 1470-8728	1470-8728	2019-03-01T00:00:00Z	2019-03-12T00:00:00Z	Portland Press Ltd.	cc-by	cc-by	Unknown	publisher_splash_page	Unknown	FALSE	FALSE	FALSE	FALSE	FALSE	FALSE	Added DOI from EUPMC_x000D_ This article is not open access according to EUPMC, but since 6th March 2020 we take this to mean only that the publisher did not indicate to EUPMC that it can be included in their Open Access subset - it may well still be an OA article._x000D_ Added journal title from EUPMC_x000D_ Added issn from EUPMC_x000D_ Added eissn from EUPMC_x000D_ Added grants data from EUPMC_…		1500	GBP	1800		None	1800		CC BY		FALSE
Birmingham	PMC6767425	30773735	10.1002/jmri.26689	Variation in Cardiovascular Magnetic Resonance Myocardial Contouring: Insights from an International Survey	Journal of magnetic resonance imaging : JMRI	FALSE	1053-1807, 1522-2586	1522-2586	2019-10-01T00:00:00Z	2019-02-17T00:00:00Z	Wiley	not applicable	cc-by	cc-by	epmc_api	epmc_api	TRUE	TRUE	FALSE	TRUE	TRUE	TRUE	Added PMCID from EUPMC_x000D_ Confirmed fulltext is in EUPMC_x000D_ Confirmed is open access from EUPMC_x000D_ Added journal title from EUPMC_x000D_ Added issn from EUPMC_x000D_ Added eissn from EUPMC_x000D_ Added grants data from EUPMC_x000D_ Added date of publication from EUPMC_x000D_ Added electronic publication date from EUPMC_x000D_ Checking if XML is available from EUPMC (since 6th March 20…		1875	GBP	2250		Institutional_Prepayment	2250		CC BY	Wiley OAPA	Unknown
Birmingham	PMC6613741	30772822	10.1136/heartjnl-2018-314428	Trends in surgical and catheter interventions for isolated congenital shunt lesions in UK & Ireland	Heart (British Cardiac Society)	FALSE	1355-6037, 1468-201X	1468-201X	2019-07-01T00:00:00Z	2019-02-16T00:00:00Z	BMJ	not applicable	cc-by	cc-by	epmc_api	epmc_api	TRUE	TRUE	FALSE	TRUE	TRUE	TRUE	Added PMCID from EUPMC_x000D_ Confirmed fulltext is in EUPMC_x000D_ Confirmed is open access from EUPMC_x000D_ Added journal title from EUPMC_x000D_ Added issn from EUPMC_x000D_ Added eissn from EUPMC_x000D_ Added grants data from EUPMC_x000D_ Added date of publication from EUPMC_x000D_ Added electronic publication date from EUPMC_x000D_ Checking if XML is available from EUPMC (since 6th March 20…		1657.5	GBP	1989		Institutional_Prepayment	1989		CC BY	BMJ OA Account	Unknown
Birmingham	PMC6410684	30763274	10.1530/EJE-18-0693	Increased risk of obstructive sleep apnoea in women with polycystic ovary syndrome: a population-based cohort study	European journal of endocrinology	FALSE	0804-4643, 1479-683X	1479-683X	2019-04-01T00:00:00Z	Unknown	Bioscientifica	not applicable	cc-by	cc-by	epmc_api	epmc_api	TRUE	TRUE	FALSE	TRUE	TRUE	TRUE	Added PMCID from EUPMC_x000D_ Confirmed fulltext is in EUPMC_x000D_ Confirmed is open access from EUPMC_x000D_ Added journal title from EUPMC_x000D_ Added issn from EUPMC_x000D_ Added eissn from EUPMC_x000D_ Added grants data from EUPMC_x000D_ Added date of publication from EUPMC_x000D_ Checking if XML is available from EUPMC (since 6th March 2020 this is always done for any article we have a PMC…		1500	GBP	1800		None	1800		CC BY		Unknown
Birmingham	PMC6432720	30745334	10.1242/jcs.222067	Podoplanin regulates the migration of mesenchymal stromal cells and their interaction with platelets	Journal of cell science	FALSE	0021-9533, 1477-9137	1477-9137	2019-02-01T00:00:00Z	2019-02-25T00:00:00Z	The Company of Biologists	not applicable	cc-by	cc-by	epmc_api	epmc_api	TRUE	TRUE	FALSE	TRUE	TRUE	TRUE	Added PMCID from EUPMC_x000D_ Confirmed fulltext is in EUPMC_x000D_ Confirmed is open access from EUPMC_x000D_ Added journal title from EUPMC_x000D_ Added issn from EUPMC_x000D_ Added eissn from EUPMC_x000D_ Added grants data from EUPMC_x000D_ Added date of publication from EUPMC_x000D_ Added electronic publication date from EUPMC_x000D_ Checking if XML is available from EUPMC (since 6th March 20…		4500	USD	3429.36		None	3429.36		CC BY		Unknown
Birmingham	PMC6370886	30741925	10.1038/s41467-019-08487-5	A cell cycle-coordinated nuclear compartment for Polymerase II transcription encompasses the earliest gene expression before global genome activation	Nature communications	TRUE	2041-1723	2041-1723	2019-02-01T00:00:00Z	2019-02-11T00:00:00Z	Springer Science and Business Media LLC	not applicable	cc-by	cc-by	epmc_api	epmc_api	TRUE	TRUE	FALSE	TRUE	TRUE	TRUE	Added PMCID from EUPMC_x000D_ Added PMID from EUPMC_x000D_ Confirmed fulltext is in EUPMC_x000D_ Confirmed is open access from EUPMC_x000D_ Added journal title from EUPMC_x000D_ Added issn from EUPMC_x000D_ Added eissn from EUPMC_x000D_ Added grants data from EUPMC_x000D_ Added date of publication from EUPMC_x000D_ Added electronic publication date from EUPMC_x000D_ Checking if XML is available f…		3300	GBP	3300		None	0		CC BY		Unknown
Birmingham	PMC6362081	30718782	10.1038/s41598-018-38263-2	ElectroMap: High-throughput open-source software for analysis and mapping of cardiac electrophysiology	Scientific reports	TRUE	2045-2322	2045-2322	2019-02-01T00:00:00Z	2019-02-04T00:00:00Z	Springer Science and Business Media LLC	not applicable	cc-by	cc-by	epmc_api	epmc_api	TRUE	TRUE	FALSE	TRUE	TRUE	TRUE	Added PMCID from EUPMC_x000D_ Confirmed fulltext is in EUPMC_x000D_ Confirmed is open access from EUPMC_x000D_ Added journal title from EUPMC_x000D_ Added issn from EUPMC_x000D_ Added eissn from EUPMC_x000D_ Added grants data from EUPMC_x000D_ Added date of publication from EUPMC_x000D_ Added electronic publication date from EUPMC_x000D_ Checking if XML is available from EUPMC (since 6th March 20…		1165	GBP	1398		None	1398		CC BY		Unknown
Birmingham	PMC6362048	30718480	10.1038/s41419-019-1379-6	Pigment epithelium-derived factor mediates retinal ganglion cell neuroprotection by suppression of caspase-2	Cell death & disease	TRUE	2041-4889	2041-4889	2019-02-01T00:00:00Z	2019-02-04T00:00:00Z	Springer Science and Business Media LLC	not applicable	cc-by	cc-by	epmc_api	epmc_api	TRUE	TRUE	FALSE	TRUE	TRUE	TRUE	Added PMCID from EUPMC_x000D_ Confirmed fulltext is in EUPMC_x000D_ Confirmed is open access from EUPMC_x000D_ Added journal title from EUPMC_x000D_ Added issn from EUPMC_x000D_ Added eissn from EUPMC_x000D_ Added grants data from EUPMC_x000D_ Added date of publication from EUPMC_x000D_ Added electronic publication date from EUPMC_x000D_ Checking if XML is available from EUPMC (since 6th March 20…		2490	GBP	2988		None	2988		CC BY		Unknown
Birmingham	PMC6341598	30670103	10.1186/s13643-019-0946-3	Instrument-based Tests for Measuring Anterior Chamber Cells in Uveitis: A Systematic Review Protocol	Systematic reviews	TRUE	2046-4053	2046-4053	2019-01-01T00:00:00Z	2019-01-22T00:00:00Z	Springer Science and Business Media LLC	not applicable	cc-by	cc-by	epmc_api	epmc_api	TRUE	TRUE	FALSE	TRUE	TRUE	TRUE	Added PMCID from EUPMC_x000D_ Confirmed fulltext is in EUPMC_x000D_ Confirmed is open access from EUPMC_x000D_ Added journal title from EUPMC_x000D_ Added issn from EUPMC_x000D_ Added eissn from EUPMC_x000D_ Added grants data from EUPMC_x000D_ Added date of publication from EUPMC_x000D_ Added electronic publication date from EUPMC_x000D_ Checking if XML is available from EUPMC (since 6th March 20…		1330.25	GBP	1596.3		Institutional_Prepayment	1596.3		CC BY	BMC Prepay Account	Unknown
Birmingham	PMC6580293	30657877	10.1093/ejcts/ezy474	Tetralogy of Fallot: morphological variations and implications for surgical repair	European journal of cardio-thoracic surgery : official journal of the European Association for Cardio-thoracic Surgery	FALSE	1010-7940, 1873-734X	1873-734X	2019-07-01T00:00:00Z	Unknown	Oxford University Press (OUP)	not applicable	cc-by	cc-by	epmc_api	epmc_api	TRUE	TRUE	FALSE	TRUE	TRUE	TRUE	Added PMCID from EUPMC_x000D_ Confirmed fulltext is in EUPMC_x000D_ Confirmed is open access from EUPMC_x000D_ Added journal title from EUPMC_x000D_ Added issn from EUPMC_x000D_ Added eissn from EUPMC_x000D_ Added grants data from EUPMC_x000D_ Added date of publication from EUPMC_x000D_ Checking if XML is available from EUPMC (since 6th March 2020 this is always done for any article we have a PMC…		1930	GBP	2316		None	2316		CC BY		Unknown
Birmingham	PMC6475521	30615112	10.1093/eurheartj/ehy815	Data-driven discovery and validation of circulating blood-based biomarkers associated with prevalent atrial fibrillation	European heart journal	FALSE	0195-668X, 1522-9645	1522-9645	2019-04-01T00:00:00Z	Unknown	Oxford University Press (OUP)	not applicable	cc-by	cc-by	epmc_api	epmc_api	TRUE	TRUE	FALSE	TRUE	TRUE	TRUE	Added PMCID from EUPMC_x000D_ Confirmed fulltext is in EUPMC_x000D_ Confirmed is open access from EUPMC_x000D_ Added journal title from EUPMC_x000D_ Added issn from EUPMC_x000D_ Added eissn from EUPMC_x000D_ Added grants data from EUPMC_x000D_ Added date of publication from EUPMC_x000D_ Checking if XML is available from EUPMC (since 6th March 2020 this is always done for any article we have a PMC…		2150	GBP	2580		None	2580		CC BY		Unknown
Birmingham	PMC6446821	30609142	10.1111/cea.13334	Parent Experiences with Paediatric Allergy Pathways in the West Midlands: A Qualitative study	Clinical and experimental allergy : journal of the British Society for Allergy and Clinical Immunology	FALSE	0954-7894, 1365-2222	1365-2222	2019-03-01T00:00:00Z	2019-02-11T00:00:00Z	Wiley	not applicable	cc-by	cc-by	epmc_api	epmc_api	TRUE	TRUE	FALSE	TRUE	TRUE	TRUE	Added PMCID from EUPMC_x000D_ Confirmed fulltext is in EUPMC_x000D_ Confirmed is open access from EUPMC_x000D_ Added journal title from EUPMC_x000D_ Added issn from EUPMC_x000D_ Added eissn from EUPMC_x000D_ Added grants data from EUPMC_x000D_ Added date of publication from EUPMC_x000D_ Added electronic publication date from EUPMC_x000D_ Checking if XML is available from EUPMC (since 6th March 20…		2250	GBP	2700		Institutional_Prepayment	2700		CC BY	Wiley OAPA	Unknown
Birmingham	PMC6414396	30576795	10.1016/j.joca.2018.12.006	The role of subchondral bone, and its histomorphology, on the dynamic viscoelasticity of osteochondral tissues	Osteoarthritis and cartilage	FALSE	1063-4584, 1522-9653	1522-9653	2019-03-01T00:00:00Z	2018-12-18T00:00:00Z	Elsevier BV	not applicable	cc-by	cc-by	epmc_api	epmc_api	TRUE	TRUE	FALSE	TRUE	TRUE	TRUE	Added PMCID from EUPMC_x000D_ Confirmed fulltext is in EUPMC_x000D_ Confirmed is open access from EUPMC_x000D_ Added journal title from EUPMC_x000D_ Added issn from EUPMC_x000D_ Added eissn from EUPMC_x000D_ Added grants data from EUPMC_x000D_ Added date of publication from EUPMC_x000D_ Added electronic publication date from EUPMC_x000D_ Checking if XML is available from EUPMC (since 6th March 20…		2230	EUR	2426.11		None	2426.11		CC BY		Unknown
Birmingham	PMC6322859	30575521	10.7554/eLife.39061	Specific lexico-semantic predictions are associated with unique spatial and temporal patterns of neural activity	eLife	TRUE	2050-084X	2050-084X	2018-12-01T00:00:00Z	2018-12-21T00:00:00Z	eLife Sciences Publications, Ltd	not applicable	cc-by	cc-by	epmc_api	epmc_api	TRUE	TRUE	FALSE	TRUE	TRUE	TRUE	Added PMCID from EUPMC_x000D_ Confirmed fulltext is in EUPMC_x000D_ Confirmed is open access from EUPMC_x000D_ Added journal title from EUPMC_x000D_ Added issn from EUPMC_x000D_ Added eissn from EUPMC_x000D_ Added grants data from EUPMC_x000D_ Added date of publication from EUPMC_x000D_ Added electronic publication date from EUPMC_x000D_ Checking if XML is available from EUPMC (since 6th March 20…		2500	USD	2372.13		None	2372.13		CC BY		Unknown
Birmingham	PMC6356158	30573669	10.15252/embj.201798449	A Novel Form of JARID2 is Required for Differentiation in Lineage-Committed Cells	The EMBO journal	FALSE	0261-4189, 1460-2075	1460-2075	2019-02-01T00:00:00Z	2018-12-20T00:00:00Z	EMBO	not applicable	cc-by	cc-by	epmc_api	epmc_api	TRUE	TRUE	FALSE	TRUE	TRUE	TRUE	Added PMCID from EUPMC_x000D_ Confirmed fulltext is in EUPMC_x000D_ Confirmed is open access from EUPMC_x000D_ Added journal title from EUPMC_x000D_ Added issn from EUPMC_x000D_ Added eissn from EUPMC_x000D_ Added date of publication from EUPMC_x000D_ Added electronic publication date from EUPMC_x000D_ Checking if XML is available from EUPMC (since 6th March 2020 this is always done for any artic…		3150	GBP	3780		Institutional_Prepayment	3780		CC BY	Wiley OAPA	Unknown
Birmingham	PMC6435189	30572973	10.1017/S104795111800224X	Research priorities in single ventricle heart conditions: a UK national study	Cardiology in the young	FALSE	1047-9511, 1467-1107	1467-1107	2019-03-01T00:00:00Z	2018-12-21T00:00:00Z	Cambridge University Press (CUP)	cc-by	cc-by	Unknown	publisher_splash_page	Unknown	TRUE	FALSE	FALSE	FALSE	FALSE	FALSE	Added PMCID from EUPMC_x000D_ Confirmed fulltext is in EUPMC_x000D_ This article is not open access according to EUPMC, but since 6th March 2020 we take this to mean only that the publisher did not indicate to EUPMC that it can be included in their Open Access subset - it may well still be an OA article._x000D_ Added journal title from EUPMC_x000D_ Added issn from EUPMC_x000D_ Added eissn from EU…		1870	GBP	2244		None	2244		CC BY		Unknown
Birmingham	PMC6365673	30566905	10.1530/EJE-18-0854	Causes, patterns and severity of androgen excess in 487 consecutively recruited pre- and post-pubertal children	European journal of endocrinology	FALSE	0804-4643, 1479-683X	1479-683X	2019-03-01T00:00:00Z	Unknown	Bioscientifica	not applicable	cc-by	cc-by	epmc_api	epmc_api	TRUE	TRUE	FALSE	TRUE	TRUE	TRUE	Added PMCID from EUPMC_x000D_ Confirmed fulltext is in EUPMC_x000D_ Confirmed is open access from EUPMC_x000D_ Added journal title from EUPMC_x000D_ Added issn from EUPMC_x000D_ Added eissn from EUPMC_x000D_ Added grants data from EUPMC_x000D_ Added date of publication from EUPMC_x000D_ Checking if XML is available from EUPMC (since 6th March 2020 this is always done for any article we have a PMC…		1500	GBP	1800		None	1800		CC BY		Unknown
Birmingham	Unknown	30563726	10.1016/j.tig.2018.11.005	SMALL NUCLEOLAR RNAs TELL A DIFFERENT TALE	Trends in genetics : TIG	FALSE	0168-9525	Unknown	2019-02-01T00:00:00Z	2018-12-16T00:00:00Z	Elsevier BV	Unknown	cc-by	cc-by	Unknown	Unknown	FALSE	FALSE	FALSE	FALSE	FALSE	FALSE	This article is not open access according to EUPMC, but since 6th March 2020 we take this to mean only that the publisher did not indicate to EUPMC that it can be included in their Open Access subset - it may well still be an OA article._x000D_ Added journal title from EUPMC_x000D_ Added issn from EUPMC_x000D_ Added grants data from EUPMC_x000D_ Added date of publication from EUPMC_x000D_ Added e…		3277.27	EUR	3565.48		None	3565.48		CC BY		FALSE
Birmingham	PMC6590299	30549301	10.1002/ana.25394	Genotype, extrapyramidal features and severity of variant Ataxia - Telangiectasia	Annals of neurology	FALSE	0364-5134, 1531-8249	1531-8249	2019-02-01T00:00:00Z	Unknown	Wiley	not applicable	cc-by	cc-by	epmc_api	epmc_api	TRUE	TRUE	FALSE	TRUE	TRUE	TRUE	Added PMCID from EUPMC_x000D_ Confirmed fulltext is in EUPMC_x000D_ Confirmed is open access from EUPMC_x000D_ Added journal title from EUPMC_x000D_ Added issn from EUPMC_x000D_ Added eissn from EUPMC_x000D_ Added grants data from EUPMC_x000D_ Added date of publication from EUPMC_x000D_ Checking if XML is available from EUPMC (since 6th March 2020 this is always done for any article we have a PMC…		1500	GBP	1800		Institutional_Prepayment	0	1800	CC BY	Wiley OAPA	Unknown
Birmingham	PMC6558280	30546079	10.1038/s41375-018-0311-x	Global Long Terminal Repeat activation participates in establishing the unique gene expression program of classical Hodgkin Lymphoma	Leukemia	FALSE	0887-6924, 1476-5551	1476-5551	2019-06-01T00:00:00Z	2018-12-13T00:00:00Z	Springer Science and Business Media LLC	not applicable	cc-by	cc-by	epmc_api	epmc_api	TRUE	TRUE	FALSE	TRUE	TRUE	TRUE	Added PMCID from EUPMC_x000D_ Confirmed fulltext is in EUPMC_x000D_ Confirmed is open access from EUPMC_x000D_ Added journal title from EUPMC_x000D_ Added issn from EUPMC_x000D_ Added eissn from EUPMC_x000D_ Added grants data from EUPMC_x000D_ Added date of publication from EUPMC_x000D_ Added electronic publication date from EUPMC_x000D_ Checking if XML is available from EUPMC (since 6th March 20…		2500	GBP	3000		None	3000		CC BY		Unknown
Birmingham	PMC6265957	30524158	10.1021/acs.organomet.8b00539	Phosphino-Triazole Ligands for Palladium-Catalysed Cross-Coupling	Organometallics	FALSE	0276-7333, 1520-6041	1520-6041	2018-11-01T00:00:00Z	2018-10-17T00:00:00Z	American Chemical Society (ACS)	not applicable	cc-by	cc-by	epmc_xml_permissions	epmc_xml_permissions	TRUE	TRUE	FALSE	TRUE	TRUE	TRUE	Added PMCID from EUPMC_x000D_ Confirmed fulltext is in EUPMC_x000D_ Confirmed is open access from EUPMC_x000D_ Added journal title from EUPMC_x000D_ Added issn from EUPMC_x000D_ Added eissn from EUPMC_x000D_ Added grants data from EUPMC_x000D_ Added date of publication from EUPMC_x000D_ Added electronic publication date from EUPMC_x000D_ Checking if XML is available from EUPMC (since 6th March 20…		4000	USD	3766.78		None	3766.78		CC BY		Unknown
Birmingham	PMC6406209	30520671	10.1080/09537104.2018.1543865	INVESTIGATION OF THE CONTRIBUTION OF AN UNDERLYING PLATELET DEFECT IN WOMEN WITH UNEXPLAINED HEAVY MENSTRUAL BLEEDING	Platelets	FALSE	0953-7104, 1369-1635	1369-1635	2019-01-01T00:00:00Z	2018-12-06T00:00:00Z	Informa UK Limited	not applicable	cc-by	cc-by	epmc_api	epmc_api	TRUE	TRUE	FALSE	TRUE	TRUE	TRUE	Added PMCID from EUPMC_x000D_ Confirmed fulltext is in EUPMC_x000D_ Confirmed is open access from EUPMC_x000D_ Added journal title from EUPMC_x000D_ Added issn from EUPMC_x000D_ Added eissn from EUPMC_x000D_ Added grants data from EUPMC_x000D_ Added date of publication from EUPMC_x000D_ Added electronic publication date from EUPMC_x000D_ Checking if XML is available from EUPMC (since 6th March 20…		1610.75	GBP	1932.9		JiscCollections_Taylor & Francis	1932.9		CC BY		Unknown
Birmingham	PMC6767531	30485425	10.1002/ijc.32028	Targeting the arginine metabolic brake enhances immunotherapy for leukaemia	International journal of cancer	FALSE	0020-7136, 1097-0215	1097-0215	2019-10-01T00:00:00Z	2019-01-11T00:00:00Z	Wiley	not applicable	cc-by	cc-by	epmc_api	epmc_api	TRUE	TRUE	FALSE	TRUE	TRUE	TRUE	Added PMCID from EUPMC_x000D_ Confirmed fulltext is in EUPMC_x000D_ Confirmed is open access from EUPMC_x000D_ Added journal title from EUPMC_x000D_ Added issn from EUPMC_x000D_ Added eissn from EUPMC_x000D_ Added grants data from EUPMC_x000D_ Added date of publication from EUPMC_x000D_ Added electronic publication date from EUPMC_x000D_ Checking if XML is available from EUPMC (since 6th March 20…		1996.5	GBP	2395.8		Institutional_Prepayment	2395.8		CC BY	Wiley OAPA	Unknown
Birmingham	PMC6260758	30477571	10.1186/s13104-018-3947-8	The challenges of muscle biopsy in a community based geriatric population	BMC research notes	TRUE	1756-0500	1756-0500	2018-11-01T00:00:00Z	2018-11-26T00:00:00Z	Springer Science and Business Media LLC	not applicable	cc-by	cc-by	epmc_api	epmc_api	TRUE	TRUE	FALSE	TRUE	TRUE	TRUE	Added PMCID from EUPMC_x000D_ Confirmed fulltext is in EUPMC_x000D_ Confirmed is open access from EUPMC_x000D_ Added journal title from EUPMC_x000D_ Added issn from EUPMC_x000D_ Added eissn from EUPMC_x000D_ Added grants data from EUPMC_x000D_ Added date of publication from EUPMC_x000D_ Added electronic publication date from EUPMC_x000D_ Checking if XML is available from EUPMC (since 6th March 20…		701.25	GBP	841.5		Institutional_Prepayment	0	841.5	CC BY	BMC Prepay Account	Unknown
Birmingham	PMC6355942	30473377	10.1016/j.ebiom.2018.11.034	Validation of epigenetic markers to identify colitis associated cancer: Results of module 1 of the ENDCAP-C study	EBioMedicine	TRUE	2352-3964	2352-3964	2019-01-01T00:00:00Z	2018-11-22T00:00:00Z	Elsevier BV	not applicable	cc-by	cc-by	epmc_api	epmc_api	TRUE	TRUE	FALSE	TRUE	TRUE	TRUE	Added PMCID from EUPMC_x000D_ Confirmed fulltext is in EUPMC_x000D_ Confirmed is open access from EUPMC_x000D_ Added journal title from EUPMC_x000D_ Added issn from EUPMC_x000D_ Added eissn from EUPMC_x000D_ Added grants data from EUPMC_x000D_ Added date of publication from EUPMC_x000D_ Added electronic publication date from EUPMC_x000D_ Checking if XML is available from EUPMC (since 6th March 20…		3020	EUR	3281.12		None	3281.12		CC BY		Unknown
Birmingham	PMC6280123	30463005	10.1016/j.celrep.2018.10.079	BET inhibition induces HEXIM1- and RAD51-dependent conflicts between transcription and replication	Cell reports	TRUE	2211-1247	2211-1247	2018-11-01T00:00:00Z	Unknown	Elsevier BV	not applicable	cc-by	cc-by	epmc_api	epmc_api	TRUE	TRUE	FALSE	TRUE	TRUE	TRUE	Added PMCID from EUPMC_x000D_ Confirmed fulltext is in EUPMC_x000D_ Confirmed is open access from EUPMC_x000D_ Added journal title from EUPMC_x000D_ Added issn from EUPMC_x000D_ Added eissn from EUPMC_x000D_ Added grants data from EUPMC_x000D_ Added date of publication from EUPMC_x000D_ Checking if XML is available from EUPMC (since 6th March 2020 this is always done for any article we have a PMC…		4418.61	EUR	4698.98		None	0	4698.98	CC BY		Unknown
Birmingham	PMC6319250	30449623	10.1016/S0140-6736(18)32752-1	Radiotherapy plus cisplatin or cetuximab in low-risk human papillomavirus-positive oropharyngeal cancer (De-ESCALaTE HPV): an open-label randomised controlled phase 3 trial	Lancet (London, England)	FALSE	0140-6736, 1474-547X	1474-547X	2019-01-01T00:00:00Z	2018-11-15T00:00:00Z	Elsevier BV	not applicable	cc-by	cc-by	epmc_api	epmc_api	TRUE	TRUE	FALSE	TRUE	TRUE	TRUE	Added PMCID from EUPMC_x000D_ Confirmed fulltext is in EUPMC_x000D_ Confirmed is open access from EUPMC_x000D_ Added journal title from EUPMC_x000D_ Added issn from EUPMC_x000D_ Added eissn from EUPMC_x000D_ Added grants data from EUPMC_x000D_ Added date of publication from EUPMC_x000D_ Added electronic publication date from EUPMC_x000D_ Checking if XML is available from EUPMC (since 6th March 20…		4418.6	EUR	4807.18		None	4807.18		CC BY		Unknown
Birmingham	PMC6224747	30377212	10.1136/bmjopen-2018-023769	Treatment of fatigue with physical activity and behavioural change support in Vasculitis Â– study protocol for an open-label randomised controlled feasibility study	BMJ open	TRUE	2044-6055	2044-6055	2018-10-01T00:00:00Z	2018-10-30T00:00:00Z	BMJ	not applicable	cc-by	cc-by	epmc_api	epmc_api	TRUE	TRUE	FALSE	TRUE	TRUE	TRUE	Added PMCID from EUPMC_x000D_ Confirmed fulltext is in EUPMC_x000D_ Confirmed is open access from EUPMC_x000D_ Added journal title from EUPMC_x000D_ Added issn from EUPMC_x000D_ Added eissn from EUPMC_x000D_ Added grants data from EUPMC_x000D_ Added date of publication from EUPMC_x000D_ Added electronic publication date from EUPMC_x000D_ Checking if XML is available from EUPMC (since 6th March 20…		1147.5	GBP	1377		Institutional_Prepayment	1377		CC BY	BMJ OA Account	Unknown
Birmingham	PMC6343082	30364971	10.1093/ehjci/jey147	The evolving role of CMR in primary mitral regurgitation - ready for prime time?	European heart journal cardiovascular Imaging	FALSE	2047-2404, 2047-2412	2047-2412	2019-02-01T00:00:00Z	Unknown	Oxford University Press (OUP)	not applicable	cc-by	cc-by	epmc_api	epmc_api	TRUE	TRUE	FALSE	TRUE	TRUE	TRUE	Added PMCID from EUPMC_x000D_ Confirmed fulltext is in EUPMC_x000D_ Confirmed is open access from EUPMC_x000D_ Added journal title from EUPMC_x000D_ Added issn from EUPMC_x000D_ Added eissn from EUPMC_x000D_ Added grants data from EUPMC_x000D_ Added date of publication from EUPMC_x000D_ Checking if XML is available from EUPMC (since 6th March 2020 this is always done for any article we have a PMC…		2258	GBP	2709.6		None	2709.6		CC BY		Unknown
Birmingham	PMC6334281	30358903	10.1111/cen.13889	Glucocorticoid activation by 11?-hydroxysteroid dehydrogenase enzymes in relation to inflammation and glycaemic control in chronic kidney disease: a cross-sectional study	Clinical endocrinology	FALSE	0300-0664, 1365-2265	1365-2265	2019-01-01T00:00:00Z	2018-11-15T00:00:00Z	Wiley	not applicable	cc-by	cc-by	epmc_api	epmc_api	TRUE	TRUE	FALSE	TRUE	TRUE	TRUE	Added PMCID from EUPMC_x000D_ Confirmed fulltext is in EUPMC_x000D_ Confirmed is open access from EUPMC_x000D_ Added journal title from EUPMC_x000D_ Added issn from EUPMC_x000D_ Added eissn from EUPMC_x000D_ Added grants data from EUPMC_x000D_ Added date of publication from EUPMC_x000D_ Added electronic publication date from EUPMC_x000D_ Checking if XML is available from EUPMC (since 6th March 20…		2000.25	GBP	2400.3		Institutional_Prepayment	2400.3		CC BY	Wiley OAPA	Unknown
Birmingham	PMC6200828	30357501	10.1186/s40798-018-0162-z	Time of day and Chronotype; implications for athletic performance	Sports medicine - open	TRUE	2199-1170, 2198-9761	2198-9761	2018-10-01T00:00:00Z	2018-10-24T00:00:00Z	Springer Science and Business Media LLC	not applicable	cc-by	cc-by	epmc_api	epmc_api	TRUE	TRUE	FALSE	TRUE	TRUE	TRUE	Added PMCID from EUPMC_x000D_ Confirmed fulltext is in EUPMC_x000D_ Confirmed is open access from EUPMC_x000D_ Added journal title from EUPMC_x000D_ Added issn from EUPMC_x000D_ Added eissn from EUPMC_x000D_ Added grants data from EUPMC_x000D_ Added date of publication from EUPMC_x000D_ Added electronic publication date from EUPMC_x000D_ Checking if XML is available from EUPMC (since 6th March 20…		1164.5	GBP	1397.4		Institutional_Prepayment	0	1397.4	CC BY	BMC Prepay Account	Unknown
Birmingham	PMC6201575	30355307	10.1186/s12891-018-2305-2	Surface damage of bovine articular cartilage-off-bone: the effect of variations in underlying substrate and frequency	BMC musculoskeletal disorders	TRUE	1471-2474	1471-2474	2018-10-01T00:00:00Z	2018-10-24T00:00:00Z	Springer Science and Business Media LLC	not applicable	cc-by	cc-by	epmc_api	epmc_api	TRUE	TRUE	FALSE	TRUE	TRUE	TRUE	Added PMCID from EUPMC_x000D_ Confirmed fulltext is in EUPMC_x000D_ Confirmed is open access from EUPMC_x000D_ Added journal title from EUPMC_x000D_ Added issn from EUPMC_x000D_ Added eissn from EUPMC_x000D_ Added grants data from EUPMC_x000D_ Added date of publication from EUPMC_x000D_ Added electronic publication date from EUPMC_x000D_ Checking if XML is available from EUPMC (since 6th March 20…		1164.5	GBP	1397.4		Institutional_Prepayment	1397.4		CC BY	BMC Prepay Account	Unknown
Birmingham	PMC6178765	30349881	10.1002/rth2.12151	A Comprehensive Targeted Next-Generation Sequencing Panel for Genetic Diagnosis of patients with suspected inherited thrombocytopenia	Research and practice in thrombosis and haemostasis	TRUE	2475-0379	2475-0379	2018-10-01T00:00:00Z	2018-10-08T00:00:00Z	Wiley	not applicable	cc-by	cc-by	epmc_api	epmc_api	TRUE	TRUE	FALSE	TRUE	TRUE	TRUE	Added PMCID from EUPMC_x000D_ Confirmed fulltext is in EUPMC_x000D_ Confirmed is open access from EUPMC_x000D_ Added journal title from EUPMC_x000D_ Added issn from EUPMC_x000D_ Added eissn from EUPMC_x000D_ Added grants data from EUPMC_x000D_ Added date of publication from EUPMC_x000D_ Added electronic publication date from EUPMC_x000D_ Checking if XML is available from EUPMC (since 6th March 20…		1001	GBP	1201.2		Institutional_Prepayment	1201.2		CC BY	Wiley OAPA	Unknown
Birmingham	PMC6193975	30337633	10.1038/s41598-018-33840-x	Obese subcutaneous adipose tissue impairs human myogenesis, particularly in old skeletal muscle, via resistin-mediated activation of NF?B	Scientific reports	TRUE	2045-2322	2045-2322	2018-10-01T00:00:00Z	2018-10-18T00:00:00Z	Springer Science and Business Media LLC	not applicable	cc-by	cc-by	epmc_api	epmc_api	TRUE	TRUE	FALSE	TRUE	TRUE	TRUE	Added PMCID from EUPMC_x000D_ Confirmed fulltext is in EUPMC_x000D_ Confirmed is open access from EUPMC_x000D_ Added journal title from EUPMC_x000D_ Added issn from EUPMC_x000D_ Added eissn from EUPMC_x000D_ Added grants data from EUPMC_x000D_ Added date of publication from EUPMC_x000D_ Added electronic publication date from EUPMC_x000D_ Checking if XML is available from EUPMC (since 6th March 20…		1165	GBP	1398		None	1398		CC BY		Unknown
Birmingham	PMC6167451	30319605	10.3389/fimmu.2018.02106	V?2+ T CellsÂ—Two Subsets for the Price of One	Frontiers in Immunology	TRUE	1664-3224	1664-3224	2018-01-01T00:00:00Z	2018-09-25T00:00:00Z	Frontiers Media SA	not applicable	cc-by	cc-by	epmc_api	epmc_api	TRUE	TRUE	FALSE	TRUE	TRUE	TRUE	Added PMCID from EUPMC_x000D_ Confirmed fulltext is in EUPMC_x000D_ Confirmed is open access from EUPMC_x000D_ Added journal title from EUPMC_x000D_ Added issn from EUPMC_x000D_ Added eissn from EUPMC_x000D_ Added grants data from EUPMC_x000D_ Added date of publication from EUPMC_x000D_ Added electronic publication date from EUPMC_x000D_ Checking if XML is available from EUPMC (since 6th March 20…		427.5	USD	391.332		Institutional_Prepayment	391.332		CC BY	Frontiers Prepay Account	Unknown
Birmingham	PMC6582816	30269098	10.1136/bjophthalmol-2018-312568	The United Kingdom Diabetic Retinopathy Electronic Medical Record (UK DR EMR) Users Group: Report 4 - Real world data for the impact of deprivation on the presentation of diabetic eye disease at hospital services	The British journal of ophthalmology	FALSE	0007-1161, 1468-2079	1468-2079	2019-06-01T00:00:00Z	2018-09-29T00:00:00Z	BMJ	not applicable	cc-by	cc-by	epmc_api	epmc_api	TRUE	TRUE	FALSE	TRUE	TRUE	TRUE	Added PMCID from EUPMC_x000D_ Confirmed fulltext is in EUPMC_x000D_ Confirmed is open access from EUPMC_x000D_ Added journal title from EUPMC_x000D_ Added issn from EUPMC_x000D_ Added eissn from EUPMC_x000D_ Added grants data from EUPMC_x000D_ Added date of publication from EUPMC_x000D_ Added electronic publication date from EUPMC_x000D_ Checking if XML is available from EUPMC (since 6th March 20…		1657.5	GBP	1989		Institutional_Prepayment	1989		CC BY	BMJ OA Account	Unknown
Birmingham	PMC6143705	30258435	10.3389/fimmu.2018.01952	Tertiary lymphoid structures: guests or hosts of autoimmunity?	Frontiers in immunology	TRUE	1664-3224	1664-3224	2018-01-01T00:00:00Z	2018-09-12T00:00:00Z	Frontiers Media SA	not applicable	cc-by	cc-by	epmc_api	epmc_api	TRUE	TRUE	FALSE	TRUE	TRUE	TRUE	Added PMCID from EUPMC_x000D_ Confirmed fulltext is in EUPMC_x000D_ Confirmed is open access from EUPMC_x000D_ Added journal title from EUPMC_x000D_ Added issn from EUPMC_x000D_ Added eissn from EUPMC_x000D_ Added grants data from EUPMC_x000D_ Added date of publication from EUPMC_x000D_ Added electronic publication date from EUPMC_x000D_ Checking if XML is available from EUPMC (since 6th March 20…		2522.25	USD	2310.12		Institutional_Prepayment	2310.12		CC BY	Frontiers Prepay Account	Unknown
Birmingham	PMC6158513	30258038	10.1128/mSphere.00403-18	Pathways of Pathogenicity: Transcriptional Stages of Germination in the Fatal Fungal Pathogen Rhizopus delemar	mSphere	TRUE	2379-5042	2379-5042	2018-09-01T00:00:00Z	2018-09-26T00:00:00Z	American Society for Microbiology	not applicable	cc-by	cc-by	epmc_api	epmc_api	TRUE	TRUE	FALSE	TRUE	TRUE	TRUE	Added PMCID from EUPMC_x000D_ Confirmed fulltext is in EUPMC_x000D_ Confirmed is open access from EUPMC_x000D_ Added journal title from EUPMC_x000D_ Added issn from EUPMC_x000D_ Added eissn from EUPMC_x000D_ Added grants data from EUPMC_x000D_ Added date of publication from EUPMC_x000D_ Added electronic publication date from EUPMC_x000D_ Checking if XML is available from EUPMC (since 6th March 20…		2510	USD	2357.36		None	2357.36		CC BY		Unknown
Birmingham	PMC6334272	30256433	10.1111/cen.13862	Serum testosterone, sex hormone-binding globulin and sex-specific risk of incident type 2 diabetes in a retrospective primary care cohort	Clinical endocrinology	FALSE	0300-0664, 1365-2265	1365-2265	2019-01-01T00:00:00Z	2018-10-23T00:00:00Z	Wiley	not applicable	cc-by	cc-by	epmc_api	epmc_api	TRUE	TRUE	FALSE	TRUE	TRUE	TRUE	Added PMCID from EUPMC_x000D_ Confirmed fulltext is in EUPMC_x000D_ Confirmed is open access from EUPMC_x000D_ Added journal title from EUPMC_x000D_ Added issn from EUPMC_x000D_ Added eissn from EUPMC_x000D_ Added grants data from EUPMC_x000D_ Added date of publication from EUPMC_x000D_ Added electronic publication date from EUPMC_x000D_ Checking if XML is available from EUPMC (since 6th March 20…		2000.25	GBP	2400.3		Institutional_Prepayment	2400.3		CC BY	Wiley OAPA	Unknown
Birmingham	PMC6257621	30204411	10.1021/acschembio.8b00815	Aggregation of Vibrio cholerae by cationic polymers enhances quorum sensing but over-rides biofilm dissipation in response to autoinduction	ACS chemical biology	FALSE	1554-8929, 1554-8937	1554-8937	2018-10-01T00:00:00Z	2018-09-20T00:00:00Z	American Chemical Society (ACS)	not applicable	cc-by	cc-by	epmc_xml_permissions	epmc_xml_permissions	TRUE	TRUE	FALSE	TRUE	TRUE	TRUE	Added PMCID from EUPMC_x000D_ Confirmed fulltext is in EUPMC_x000D_ Confirmed is open access from EUPMC_x000D_ Added journal title from EUPMC_x000D_ Added issn from EUPMC_x000D_ Added eissn from EUPMC_x000D_ Added grants data from EUPMC_x000D_ Added date of publication from EUPMC_x000D_ Added electronic publication date from EUPMC_x000D_ Checking if XML is available from EUPMC (since 6th March 20…		4000	USD	3703.7		None	0	3703.7	CC BY		Unknown
Birmingham	PMC6127258	30190568	10.1038/s41598-018-31513-3	Metallo supramolecular cylinders inhibit HIV-1 TAR-TAT complex formation and viral replication in cellulo	Scientific reports	TRUE	2045-2322	2045-2322	2018-09-01T00:00:00Z	2018-09-06T00:00:00Z	Springer Science and Business Media LLC	not applicable	cc-by	cc-by	epmc_api	epmc_api	TRUE	TRUE	FALSE	TRUE	TRUE	TRUE	Added PMCID from EUPMC_x000D_ Confirmed fulltext is in EUPMC_x000D_ Confirmed is open access from EUPMC_x000D_ Added journal title from EUPMC_x000D_ Added issn from EUPMC_x000D_ Added eissn from EUPMC_x000D_ Added grants data from EUPMC_x000D_ Added date of publication from EUPMC_x000D_ Added electronic publication date from EUPMC_x000D_ Checking if XML is available from EUPMC (since 6th March 20…		1165	GBP	1398		None	1398		CC BY		Unknown
Birmingham	PMC6105697	30166984	10.3389/fimmu.2018.01820	The biological influence and clinical relevance of polymorphism within the NKG2D ligands	Frontiers in Immunology	TRUE	1664-3224	1664-3224	2018-01-01T00:00:00Z	2018-08-16T00:00:00Z	Frontiers Media SA	not applicable	cc-by	cc-by	epmc_api	epmc_api	TRUE	TRUE	FALSE	TRUE	TRUE	TRUE	Added PMCID from EUPMC_x000D_ Confirmed fulltext is in EUPMC_x000D_ Confirmed is open access from EUPMC_x000D_ Added journal title from EUPMC_x000D_ Added issn from EUPMC_x000D_ Added eissn from EUPMC_x000D_ Added grants data from EUPMC_x000D_ Added date of publication from EUPMC_x000D_ Added electronic publication date from EUPMC_x000D_ Checking if XML is available from EUPMC (since 6th March 20…		1757.5	USD	1444.52		Institutional_Prepayment	1444.52		CC BY	Frontiers Prepay Account	Unknown
Birmingham	PMC6116544	30157919	10.1186/s13075-018-1695-8	The host cellular immune response to cytomegalovirus targets the endothelium and is associated with increased arterial stiffness in ANCA-associated vasculitis	Arthritis research & therapy	TRUE	1478-6354, 1478-6362	1478-6362	2018-08-01T00:00:00Z	2018-08-29T00:00:00Z	Springer Science and Business Media LLC	not applicable	cc-by	cc-by	epmc_api	epmc_api	TRUE	TRUE	FALSE	TRUE	TRUE	TRUE	Added PMCID from EUPMC_x000D_ Confirmed fulltext is in EUPMC_x000D_ Confirmed is open access from EUPMC_x000D_ Added journal title from EUPMC_x000D_ Added issn from EUPMC_x000D_ Added eissn from EUPMC_x000D_ Added grants data from EUPMC_x000D_ Added date of publication from EUPMC_x000D_ Added electronic publication date from EUPMC_x000D_ Checking if XML is available from EUPMC (since 6th March 20…		1487.5	GBP	1785		Institutional_Prepayment	1785		CC BY	BMC Prepay Account	Unknown
Birmingham	PMC6187027	30129666	10.1113/JP276644	Acute hydrocortisone administration reduces cardiovagal baroreflex sensitivity and heart rate variability in young men	The Journal of physiology	FALSE	0022-3751, 1469-7793	1469-7793	2018-10-01T00:00:00Z	2018-09-12T00:00:00Z	Wiley	not applicable	cc-by	cc-by	epmc_api	epmc_api	TRUE	TRUE	FALSE	TRUE	TRUE	TRUE	Added PMCID from EUPMC_x000D_ Confirmed fulltext is in EUPMC_x000D_ Confirmed is open access from EUPMC_x000D_ Added journal title from EUPMC_x000D_ Added issn from EUPMC_x000D_ Added eissn from EUPMC_x000D_ Added grants data from EUPMC_x000D_ Added date of publication from EUPMC_x000D_ Added electronic publication date from EUPMC_x000D_ Checking if XML is available from EUPMC (since 6th March 20…		1974.75	GBP	2369.7		Institutional_Prepayment	2369.7		CC BY	Wiley OAPA	Unknown
Birmingham	PMC6093599	30110320	10.1371/journal.pbio.2003805	Serial representation of items during working memory maintenance at letter-selective cortical sites	PLoS biology	TRUE	1544-9173, 1545-7885	1545-7885	2018-08-01T00:00:00Z	2018-08-15T00:00:00Z	Public Library of Science (PLoS)	not applicable	cc-by	cc-by	epmc_api	epmc_api	TRUE	TRUE	FALSE	TRUE	TRUE	TRUE	Added PMCID from EUPMC_x000D_ Confirmed fulltext is in EUPMC_x000D_ Confirmed is open access from EUPMC_x000D_ Added journal title from EUPMC_x000D_ Added issn from EUPMC_x000D_ Added eissn from EUPMC_x000D_ Added grants data from EUPMC_x000D_ Added date of publication from EUPMC_x000D_ Added electronic publication date from EUPMC_x000D_ Checking if XML is available from EUPMC (since 6th March 20…		2900	USD	2383.56		Institutional_Prepayment	2383.56		CC BY	PLOS Institutional Deposit Account	Unknown
Birmingham	PMC6378396	30095360	10.1177/0267659118794343	Cardioplegia practice in paediatric cardiac surgery: a UK & Ireland survey	Perfusion	FALSE	0267-6591, 1477-111X	1477-111X	2019-03-01T00:00:00Z	2018-08-10T00:00:00Z	SAGE Publications	not applicable	cc-by	cc-by	epmc_api	epmc_api	TRUE	TRUE	FALSE	TRUE	TRUE	TRUE	Added PMCID from EUPMC_x000D_ Confirmed fulltext is in EUPMC_x000D_ Confirmed is open access from EUPMC_x000D_ Added journal title from EUPMC_x000D_ Added issn from EUPMC_x000D_ Added eissn from EUPMC_x000D_ Added grants data from EUPMC_x000D_ Added date of publication from EUPMC_x000D_ Added electronic publication date from EUPMC_x000D_ Checking if XML is available from EUPMC (since 6th March 20…		200	GBP	240		Sage prepayment	240		CC BY		Unknown
Birmingham	PMC6588092	30058119	10.1002/lt.25315	Combined Hypothermic and Normothermic Machine Perfusion Improves Functional Recovery of Extended Criteria Donor Livers	Liver transplantation : official publication of the American Association for the Study of Liver Diseases and the International Liver Transplantation Society	FALSE	1527-6465, 1527-6473	1527-6473	2018-12-01T00:00:00Z	Unknown	Wiley	not applicable	cc-by	cc-by	epmc_api	epmc_api	TRUE	TRUE	FALSE	TRUE	TRUE	TRUE	Added PMCID from EUPMC_x000D_ Confirmed fulltext is in EUPMC_x000D_ Confirmed is open access from EUPMC_x000D_ Added journal title from EUPMC_x000D_ Added issn from EUPMC_x000D_ Added eissn from EUPMC_x000D_ Added grants data from EUPMC_x000D_ Added date of publication from EUPMC_x000D_ Checking if XML is available from EUPMC (since 6th March 2020 this is always done for any article we have a PMC…		825	GBP	990		Institutional_Prepayment	990		CC BY	Wiley OAPA	Unknown
Birmingham	PMC6269309	30026342	10.3324/haematol.2018.193391	Inhibition of Btk by Btk-specific concentrations of ibrutinib and acalabrutinib delays but does not block platelet aggregation mediated by glycoprotein VI	Haematologica	TRUE	0390-6078, 1592-8721	1592-8721	2018-12-01T00:00:00Z	2018-07-19T00:00:00Z	Ferrata Storti Foundation (Haematologica)	cc-by-nc	cc-by-nc	cc-by-nc	publisher_splash_page	epmc_api	TRUE	TRUE	FALSE	TRUE	FALSE	FALSE	Added PMCID from EUPMC_x000D_ Confirmed fulltext is in EUPMC_x000D_ Confirmed is open access from EUPMC_x000D_ Added journal title from EUPMC_x000D_ Added issn from EUPMC_x000D_ Added eissn from EUPMC_x000D_ Added grants data from EUPMC_x000D_ Added date of publication from EUPMC_x000D_ Added electronic publication date from EUPMC_x000D_ Checking if XML is available from EUPMC (since 6th March 20…		1600	EUR	1719.66		None	1719.66		CC BY-NC	Incorrect licence - queried with publisher 18/03/2019	Unknown
Birmingham	PMC6036166	30013562	10.3389/fimmu.2018.01501	Development and selection of the human V?9Vd2+ T cell repertoire	Frontiers in Immunology	TRUE	1664-3224	1664-3224	2018-01-01T00:00:00Z	2018-07-02T00:00:00Z	Frontiers Media SA	not applicable	cc-by	cc-by	epmc_api	epmc_api	TRUE	TRUE	FALSE	TRUE	TRUE	TRUE	Added PMCID from EUPMC_x000D_ Confirmed fulltext is in EUPMC_x000D_ Confirmed is open access from EUPMC_x000D_ Added journal title from EUPMC_x000D_ Added issn from EUPMC_x000D_ Added eissn from EUPMC_x000D_ Added grants data from EUPMC_x000D_ Added date of publication from EUPMC_x000D_ Added electronic publication date from EUPMC_x000D_ Checking if XML is available from EUPMC (since 6th March 20…		1757.5	USD	1444.52		Institutional_Prepayment	1444.52		CC BY	Frontiers Prepay Account	Unknown
Birmingham	PMC6111872	29974666	10.1111/jcmm.13721	Signalling through Src Family Kinase isoforms is not redundant in models of thrombo-inflammatory vascular disease	Journal of cellular and molecular medicine	TRUE	1582-1838, 1582-4934	1582-4934	2018-09-01T00:00:00Z	2018-07-04T00:00:00Z	Wiley	not applicable	cc-by	cc-by	epmc_api	epmc_api	TRUE	TRUE	FALSE	TRUE	TRUE	TRUE	Added PMCID from EUPMC_x000D_ Confirmed fulltext is in EUPMC_x000D_ Confirmed is open access from EUPMC_x000D_ Added journal title from EUPMC_x000D_ Added issn from EUPMC_x000D_ Added eissn from EUPMC_x000D_ Added grants data from EUPMC_x000D_ Added date of publication from EUPMC_x000D_ Added electronic publication date from EUPMC_x000D_ Checking if XML is available from EUPMC (since 6th March 20…		1275	GBP	1530		Institutional_Prepayment	1530		CC BY	Wiley OAPA	Unknown
Birmingham	PMC6406210	29913076	10.1080/09537104.2018.1481937	Formin proteins in megakaryocytes and platelets: Regulation of actin and microtubule dynamics	Platelets	FALSE	0953-7104, 1369-1635	1369-1635	2019-01-01T00:00:00Z	2018-06-18T00:00:00Z	Informa UK Limited	not applicable	cc-by	cc-by	epmc_api	epmc_api	TRUE	TRUE	FALSE	TRUE	TRUE	TRUE	Added PMCID from EUPMC_x000D_ Confirmed fulltext is in EUPMC_x000D_ Confirmed is open access from EUPMC_x000D_ Added journal title from EUPMC_x000D_ Added issn from EUPMC_x000D_ Added eissn from EUPMC_x000D_ Added grants data from EUPMC_x000D_ Added date of publication from EUPMC_x000D_ Added electronic publication date from EUPMC_x000D_ Checking if XML is available from EUPMC (since 6th March 20…		1519.8	GBP	1823.76		JiscCollections_Taylor & Francis	1823.76		CC BY		Unknown
Birmingham	PMC6629115	29879376	10.1096/fj.201800246R	The VAMP-associated protein VAPB is required for cardiac and neuronal pacemaker channel function	FASEB journal : official publication of the Federation of American Societies for Experimental Biology	FALSE	0892-6638, 1530-6860	1530-6860	2018-11-01T00:00:00Z	2018-06-07T00:00:00Z	Wiley	not applicable	cc-by	cc-by	epmc_api	epmc_api	TRUE	TRUE	FALSE	TRUE	TRUE	TRUE	Added PMCID from EUPMC_x000D_ Confirmed fulltext is in EUPMC_x000D_ Confirmed is open access from EUPMC_x000D_ Added journal title from EUPMC_x000D_ Added issn from EUPMC_x000D_ Added eissn from EUPMC_x000D_ Added grants data from EUPMC_x000D_ Added date of publication from EUPMC_x000D_ Added electronic publication date from EUPMC_x000D_ Checking if XML is available from EUPMC (since 6th March 20…		2500	USD	1959.25		None	1959.25		CC BY		Unknown
Birmingham	PMC6026388	29792262	10.1016/j.jash.2018.04.010	Chronic kidney disease as a cardiovascular risk factor: lessons from kidney donors	Journal of the American Society of Hypertension : JASH	FALSE	1933-1711, 1878-7436	1878-7436	2018-07-01T00:00:00Z	2018-05-09T00:00:00Z	Elsevier BV	not applicable	cc-by	cc-by	epmc_api	epmc_api	TRUE	TRUE	FALSE	TRUE	TRUE	TRUE	Added PMCID from EUPMC_x000D_ Confirmed fulltext is in EUPMC_x000D_ Confirmed is open access from EUPMC_x000D_ Added journal title from EUPMC_x000D_ Added issn from EUPMC_x000D_ Added eissn from EUPMC_x000D_ Added grants data from EUPMC_x000D_ Added date of publication from EUPMC_x000D_ Added electronic publication date from EUPMC_x000D_ Checking if XML is available from EUPMC (since 6th March 20…		2430.23	EUR	428.33		None	428.33		CC BY	VAT only. Rest of APC claimed in previous reporting period 2017/18	Unknown
Birmingham	PMC6166601	29748251	10.1136/thoraxjnl-2017-210683	Respiratory mortality of childhood, adolescent and young adult cancer survivors	Thorax	FALSE	0040-6376, 1468-3296	1468-3296	2018-10-01T00:00:00Z	2018-05-10T00:00:00Z	BMJ	not applicable	cc-by	cc-by	epmc_api	epmc_api	TRUE	TRUE	FALSE	TRUE	TRUE	TRUE	Added PMCID from EUPMC_x000D_ Confirmed fulltext is in EUPMC_x000D_ Confirmed is open access from EUPMC_x000D_ Added journal title from EUPMC_x000D_ Added issn from EUPMC_x000D_ Added eissn from EUPMC_x000D_ Added grants data from EUPMC_x000D_ Added date of publication from EUPMC_x000D_ Added electronic publication date from EUPMC_x000D_ Checking if XML is available from EUPMC (since 6th March 20…		3000	GBP	3600		Institutional_Prepayment	3600		CC BY	BMJ OA Account	Unknown
Birmingham	PMC6691754	29696828	10.1002/adhm.201800152	Contact Lenses for Color Blindness	Advanced healthcare materials	FALSE	2192-2640, 2192-2659	2192-2659	2018-06-01T00:00:00Z	2018-04-26T00:00:00Z	Wiley	not applicable	cc-by	cc-by	epmc_api	epmc_api	TRUE	TRUE	FALSE	TRUE	TRUE	TRUE	Added PMCID from EUPMC_x000D_ Confirmed fulltext is in EUPMC_x000D_ Confirmed is open access from EUPMC_x000D_ Added journal title from EUPMC_x000D_ Added issn from EUPMC_x000D_ Added eissn from EUPMC_x000D_ Added grants data from EUPMC_x000D_ Added date of publication from EUPMC_x000D_ Added electronic publication date from EUPMC_x000D_ Checking if XML is available from EUPMC (since 6th March 20…		1749.75	GBP	2099.7		Institutional_Prepayment	2099.7		CC BY	Wiley OAPA	Unknown
Birmingham	PMC6004054	29678925	10.1261/rna.066415.118	Role of the novel endoribonuclease SLFN14 and its disease causing mutations in ribosomal degradationolution	RNA (New York, N.Y.)	FALSE	1355-8382, 1469-9001	1469-9001	2018-07-01T00:00:00Z	2018-04-20T00:00:00Z	Cold Spring Harbor Laboratory	not applicable	cc-by	cc-by	epmc_api	epmc_api	TRUE	FALSE	FALSE	FALSE	TRUE	FALSE	Added PMCID from EUPMC_x000D_ Confirmed fulltext is in EUPMC_x000D_ This article is not open access according to EUPMC, but since 6th March 2020 we take this to mean only that the publisher did not indicate to EUPMC that it can be included in their Open Access subset - it may well still be an OA article._x000D_ Added journal title from EUPMC_x000D_ Added issn from EUPMC_x000D_ Added eissn from EU…		2000	USD	1890.78		None	1890.78		CC BY		Unknown
Birmingham	Unknown	29648509	10.1177/0141076818762648	Time to regenerate: the new doctor in the age of AI	Journal of the Royal Society of Medicine	FALSE	0141-0768, 1758-1095	1758-1095	2018-04-01T00:00:00Z	Unknown	SAGE Publications	cc-by	cc-by	Unknown	publisher_splash_page	Unknown	FALSE	FALSE	FALSE	FALSE	FALSE	FALSE	This article is not open access according to EUPMC, but since 6th March 2020 we take this to mean only that the publisher did not indicate to EUPMC that it can be included in their Open Access subset - it may well still be an OA article._x000D_ Added journal title from EUPMC_x000D_ Added issn from EUPMC_x000D_ Added eissn from EUPMC_x000D_ Added grants data from EUPMC_x000D_ Added date of publica…		400	GBP	480		Sage prepayment	480		CC BY		FALSE
Birmingham	PMC6342411	29087691	10.1021/acsami.7b15713	Laser Nanopatterning of Colored Ink Thin Films for Photonic Devices	ACS applied materials & interfaces	FALSE	1944-8244, 1944-8252	1944-8252	2017-11-01T00:00:00Z	2017-10-31T00:00:00Z	American Chemical Society (ACS)	not applicable	cc-by	cc-by	epmc_xml_permissions	epmc_xml_permissions	TRUE	TRUE	FALSE	TRUE	TRUE	TRUE	Added PMCID from EUPMC_x000D_ Confirmed fulltext is in EUPMC_x000D_ Confirmed is open access from EUPMC_x000D_ Added journal title from EUPMC_x000D_ Added issn from EUPMC_x000D_ Added eissn from EUPMC_x000D_ Added grants data from EUPMC_x000D_ Added date of publication from EUPMC_x000D_ Added electronic publication date from EUPMC_x000D_ Checking if XML is available from EUPMC (since 6th March 20…		4000	USD	3772.99		None	3772.99		CC BY		Unknown
Birmingham	PMC5854374	29066221	10.1016/j.jaut.2017.10.001	Decreased sensitivity to 1,25-dihydroxyvitamin D3 in T cells from the rheumatoid joint	Journal of autoimmunity	FALSE	0896-8411, 1095-9157	1095-9157	2018-03-01T00:00:00Z	2017-10-21T00:00:00Z	Elsevier BV	not applicable	cc-by	cc-by	epmc_api	epmc_api	TRUE	TRUE	FALSE	TRUE	TRUE	TRUE	Added PMCID from EUPMC_x000D_ Confirmed fulltext is in EUPMC_x000D_ Confirmed is open access from EUPMC_x000D_ Added journal title from EUPMC_x000D_ Added issn from EUPMC_x000D_ Added eissn from EUPMC_x000D_ Added grants data from EUPMC_x000D_ Added date of publication from EUPMC_x000D_ Added electronic publication date from EUPMC_x000D_ Checking if XML is available from EUPMC (since 6th March 20…		3408.82	EUR	2917.47		None	0		CC BY		Unknown
Birmingham	PMC5530351	27965259	10.1136/annrheumdis-2016-210448	Standardisation of labial salivary gland histopathology in clinical trials in primary SjÃƒÂ¶gren's syndrome.	Annals of the rheumatic diseases	FALSE	0003-4967, 1468-2060	1468-2060	2017-07-01T00:00:00Z	2016-12-13T00:00:00Z	BMJ	not applicable	cc-by	cc-by	epmc_api	epmc_api	TRUE	TRUE	FALSE	TRUE	TRUE	TRUE	Added PMCID from EUPMC_x000D_ Confirmed fulltext is in EUPMC_x000D_ Confirmed is open access from EUPMC_x000D_ Added journal title from EUPMC_x000D_ Added issn from EUPMC_x000D_ Added eissn from EUPMC_x000D_ Added grants data from EUPMC_x000D_ Added date of publication from EUPMC_x000D_ Added electronic publication date from EUPMC_x000D_ Checking if XML is available from EUPMC (since 6th March 20…		1950	GBP	2340		Institutional_Prepayment	2340		CC BY	BMJ OA Account	Unknown
Bristol	Unknown	Unknown	10.1111/ejop.12480	Expanding transformative experience	European Journal of Philosophy	FALSE	0966-8373	Unknown	Unknown	Unknown	Wiley	cc-by	cc-by	Unknown	publisher_splash_page	Unknown	FALSE	FALSE	FALSE	FALSE	FALSE	FALSE	Unable to locate article in EPMC._x000D_ Added publisher name from Crossref_x000D_ Added ISSN from Crossref_x000D_ Added journal title from Crossref_x000D_ Found DOI in CORE_x000D_ Searched OpenDOAR but could not find repo and/or URL_x000D_ Added repositories that CORE claims article is available from_x000D_ Found DOI in BASE_x000D_ Searched OpenDOAR but could not find repo and/or URL_x000D_ Not …	43738	2000.4	GBP	2000.4		None	2000.4	0	CC-BY	Epublished only, not in PubMed etc yet - 06/11/2019	Unknown
Bristol	PMC6864067	31745073	10.1038/s41467-019-12424-x	Genetic evidence for assortative mating on alcohol consumption in the UK Biobank	Nature communications	TRUE	2041-1723	2041-1723	2019-11-01T00:00:00Z	2019-11-19T00:00:00Z	Springer Science and Business Media LLC	not applicable	cc-by	cc-by	epmc_api	epmc_api	TRUE	TRUE	FALSE	TRUE	TRUE	TRUE	Added PMCID from EUPMC_x000D_ Added PMID from EUPMC_x000D_ Confirmed fulltext is in EUPMC_x000D_ Confirmed is open access from EUPMC_x000D_ Added journal title from EUPMC_x000D_ Added issn from EUPMC_x000D_ Added eissn from EUPMC_x000D_ Added grants data from EUPMC_x000D_ Added date of publication from EUPMC_x000D_ Added electronic publication date from EUPMC_x000D_ Checking if XML is available f…	43734	4188	GBP	4188		None	2094	2094		Not published as of 06/11/2019.	Unknown
Bristol	PMC6863676	31740458	10.3399/bjgp19X706601	Safety-netting in routine primary care consultations: an observational study	The British journal of general practice : the journal of the Royal College of General Practitioners	FALSE	0960-1643, 1478-5242	1478-5242	2019-12-01T00:00:00Z	2019-11-28T00:00:00Z	Royal College of General Practitioners	not applicable	cc-by	cc-by	epmc_api	epmc_api	TRUE	TRUE	FALSE	TRUE	TRUE	TRUE	Added PMCID from EUPMC_x000D_ Added PMID from EUPMC_x000D_ Confirmed fulltext is in EUPMC_x000D_ Confirmed is open access from EUPMC_x000D_ Added journal title from EUPMC_x000D_ Added issn from EUPMC_x000D_ Added eissn from EUPMC_x000D_ Added date of publication from EUPMC_x000D_ Added electronic publication date from EUPMC_x000D_ Checking if XML is available from EUPMC (since 6th March 2020 this…	43689	2400	GBP	2400		None	2400	0		Not published as of 06/11/2019	Unknown
Bristol	PMC6863675	31740456	10.3399/bjgp19X706589	Development of a tool for coding safety-netting behaviours in primary care consultations	The British journal of general practice : the journal of the Royal College of General Practitioners	FALSE	0960-1643, 1478-5242	1478-5242	2019-12-01T00:00:00Z	2019-11-28T00:00:00Z	Royal College of General Practitioners	not applicable	cc-by	cc-by	epmc_api	epmc_api	TRUE	TRUE	FALSE	TRUE	TRUE	TRUE	Added PMCID from EUPMC_x000D_ Added PMID from EUPMC_x000D_ Confirmed fulltext is in EUPMC_x000D_ Confirmed is open access from EUPMC_x000D_ Added journal title from EUPMC_x000D_ Added issn from EUPMC_x000D_ Added eissn from EUPMC_x000D_ Added date of publication from EUPMC_x000D_ Added electronic publication date from EUPMC_x000D_ Checking if XML is available from EUPMC (since 6th March 2020 this…	43689	2400	GBP	2400		None	2400	0		Not published as of 06/11/2019	Unknown
Bristol	PMC6817317	31708691	10.1080/07341512.2019.1652435	The Categorisation of Hearing Loss Through Telephony in Inter-War Britain	History and technology	FALSE	0734-1512, 1477-2620	1477-2620	2019-01-01T00:00:00Z	2019-09-03T00:00:00Z	Informa UK Limited	not applicable	cc-by	cc-by	epmc_api	epmc_api	TRUE	TRUE	FALSE	TRUE	TRUE	TRUE	Added PMCID from EUPMC_x000D_ Confirmed fulltext is in EUPMC_x000D_ Confirmed is open access from EUPMC_x000D_ Added journal title from EUPMC_x000D_ Added issn from EUPMC_x000D_ Added eissn from EUPMC_x000D_ Added grants data from EUPMC_x000D_ Added date of publication from EUPMC_x000D_ Added electronic publication date from EUPMC_x000D_ Checking if XML is available from EUPMC (since 6th March 20…	43700	598.5	GBP	598.5		JiscCollections_Taylor & Francis	598.5	0	CC-BY		Unknown
Bristol	PMC7028075	31553493	10.1002/imhj.21832	The Relative Effects of Breastfeeding Intention and Practice on Maternal Responsiveness	Infant mental health journal	FALSE	0163-9641, 1097-0355	1097-0355	2020-01-01T00:00:00Z	2019-09-25T00:00:00Z	Wiley	not applicable	cc-by	cc-by	epmc_api	epmc_api	TRUE	TRUE	FALSE	TRUE	TRUE	TRUE	Added PMCID from EUPMC_x000D_ Confirmed fulltext is in EUPMC_x000D_ Confirmed is open access from EUPMC_x000D_ Added journal title from EUPMC_x000D_ Added issn from EUPMC_x000D_ Added eissn from EUPMC_x000D_ Added grants data from EUPMC_x000D_ Added date of publication from EUPMC_x000D_ Added electronic publication date from EUPMC_x000D_ Checking if XML is available from EUPMC (since 6th March 20…	43738	1980	GBP	1980		None	1980	0	CC-BY	Epub, not in PMC yet - 06/11/2019	Unknown
Bristol	PMC6857764	31549173	10.1093/ije/dyz190	Appraising the causal relevance of DNA methylation for risk of lung cancer	International journal of epidemiology	FALSE	0300-5771, 1464-3685	1464-3685	2019-10-01T00:00:00Z	Unknown	Oxford University Press (OUP)	not applicable	cc-by	cc-by	epmc_api	epmc_api	TRUE	TRUE	FALSE	TRUE	TRUE	TRUE	Added PMCID from EUPMC_x000D_ Confirmed fulltext is in EUPMC_x000D_ Confirmed is open access from EUPMC_x000D_ Added journal title from EUPMC_x000D_ Added issn from EUPMC_x000D_ Added eissn from EUPMC_x000D_ Added grants data from EUPMC_x000D_ Added date of publication from EUPMC_x000D_ Checking if XML is available from EUPMC (since 6th March 2020 this is always done for any article we have a PMC…	43728	2252.45	GBP	2252.45		Institutional_Prepayment	1126.23	1126.23	CC-BY	"Not yet published - epub only, waiting on PMC DG 07/11/2019 Also CRUK funded C18281/ A19169, C57854/A22171, C52724/A20138 "	Unknown
Bristol	PMC6780545	31540515	10.3390/metabo9090190	Differences in pregnancy metabolic profiles and their determinants between White European and South Asian women: Findings from the Born in Bradford Cohort	Metabolites	TRUE	2218-1989	2218-1989	2019-09-01T00:00:00Z	2019-09-18T00:00:00Z	MDPI AG	not applicable	cc-by	cc-by	epmc_api	epmc_api	TRUE	TRUE	FALSE	TRUE	TRUE	TRUE	Added PMCID from EUPMC_x000D_ Added DOI from EUPMC_x000D_ Confirmed fulltext is in EUPMC_x000D_ Confirmed is open access from EUPMC_x000D_ Added journal title from EUPMC_x000D_ Added issn from EUPMC_x000D_ Added eissn from EUPMC_x000D_ Added grants data from EUPMC_x000D_ Added date of publication from EUPMC_x000D_ Added electronic publication date from EUPMC_x000D_ Checking if XML is available fr…	43735	850	CHF	823.66		None	205.92	411.83	CC-BY		Unknown
Bristol	PMC7004081	31525280	10.1002/jbmr.3875	A rare mutation in SMAD9 associated with high bone mass identifies the SMAD-dependent BMP signalling pathway as a potential anabolic target for osteoporosis	Journal of bone and mineral research : the official journal of the American Society for Bone and Mineral Research	FALSE	0884-0431, 1523-4681	1523-4681	2020-01-01T00:00:00Z	2019-11-14T00:00:00Z	Wiley	not applicable	cc-by	cc-by	epmc_api	epmc_api	TRUE	TRUE	FALSE	TRUE	TRUE	TRUE	Added PMCID from EUPMC_x000D_ Confirmed fulltext is in EUPMC_x000D_ Confirmed is open access from EUPMC_x000D_ Added journal title from EUPMC_x000D_ Added issn from EUPMC_x000D_ Added eissn from EUPMC_x000D_ Added grants data from EUPMC_x000D_ Added date of publication from EUPMC_x000D_ Added electronic publication date from EUPMC_x000D_ Checking if XML is available from EUPMC (since 6th March 20…	43738	1500	GBP	1500		Institutional_Prepayment	750	750		Awaiting PMC deposit. AAM online only - check again after issue publication - 04/10/2019	Unknown
Bristol	PMC6710341	31481887	10.3389/fnsyn.2019.00021	Model-based inference of synaptic transmission	Frontiers in synaptic neuroscience	TRUE	1663-3563	1663-3563	2019-01-01T00:00:00Z	2019-08-20T00:00:00Z	Frontiers Media SA	not applicable	cc-by	cc-by	epmc_api	epmc_api	TRUE	TRUE	FALSE	TRUE	TRUE	TRUE	Added PMCID from EUPMC_x000D_ Confirmed fulltext is in EUPMC_x000D_ Confirmed is open access from EUPMC_x000D_ Added journal title from EUPMC_x000D_ Added issn from EUPMC_x000D_ Added eissn from EUPMC_x000D_ Added grants data from EUPMC_x000D_ Added date of publication from EUPMC_x000D_ Added electronic publication date from EUPMC_x000D_ Checking if XML is available from EUPMC (since 6th March 20…	43689	875	USD	829.06		None	829.06	0	CC-BY		Unknown
Bristol	PMC6899018	31444283	10.1242/jcs.236075	Live imaging the Foreign Body Response reveals how dampening inflammation reduces fibrosis	Journal of cell science	FALSE	0021-9533, 1477-9137	1477-9137	2019-09-01T00:00:00Z	2019-09-26T00:00:00Z	The Company of Biologists	not applicable	cc-by	cc-by	epmc_api	epmc_api	TRUE	TRUE	FALSE	TRUE	TRUE	TRUE	Added PMCID from EUPMC_x000D_ Confirmed fulltext is in EUPMC_x000D_ Confirmed is open access from EUPMC_x000D_ Added journal title from EUPMC_x000D_ Added issn from EUPMC_x000D_ Added eissn from EUPMC_x000D_ Added grants data from EUPMC_x000D_ Added date of publication from EUPMC_x000D_ Added electronic publication date from EUPMC_x000D_ Checking if XML is available from EUPMC (since 6th March 20…	43738	3000	GBP	3000		None	3000	0	CC-BY	Epub, not in PMC yet - 07/11/2019	Unknown
Bristol	PMC6899469	31441980	10.1111/cea.13485	Differential associations of allergic disease genetic variants with developmental profiles of eczema, wheeze and rhinitis	Clinical and experimental allergy : journal of the British Society for Allergy and Clinical Immunology	FALSE	0954-7894, 1365-2222	1365-2222	2019-11-01T00:00:00Z	2019-10-15T00:00:00Z	Wiley	not applicable	cc-by	cc-by	epmc_api	epmc_api	TRUE	TRUE	FALSE	TRUE	TRUE	TRUE	Added PMCID from EUPMC_x000D_ Confirmed fulltext is in EUPMC_x000D_ Confirmed is open access from EUPMC_x000D_ Added journal title from EUPMC_x000D_ Added issn from EUPMC_x000D_ Added eissn from EUPMC_x000D_ Added grants data from EUPMC_x000D_ Added date of publication from EUPMC_x000D_ Added electronic publication date from EUPMC_x000D_ Checking if XML is available from EUPMC (since 6th March 20…	43697	2700	GBP	2700		Institutional_Prepayment	450.9	1350	CC-BY	33.3% charged to BHF directly, 50% UKRI, leaves 16.7% Wellcome. Epub, not in PMC yet - 07/11/2019	Unknown
Bristol	PMC6701561	31427319	10.1136/bmjopen-2018-027766	Childhood adversity and deliberate self-poisoning in Sri Lanka: a protocol for a hospital-based case-control study	BMJ open	TRUE	2044-6055	2044-6055	2019-08-01T00:00:00Z	2019-08-18T00:00:00Z	BMJ	not applicable	cc-by	cc-by	epmc_api	epmc_api	TRUE	TRUE	FALSE	TRUE	TRUE	TRUE	Added PMCID from EUPMC_x000D_ Confirmed fulltext is in EUPMC_x000D_ Confirmed is open access from EUPMC_x000D_ Added journal title from EUPMC_x000D_ Added issn from EUPMC_x000D_ Added eissn from EUPMC_x000D_ Added grants data from EUPMC_x000D_ Added date of publication from EUPMC_x000D_ Added electronic publication date from EUPMC_x000D_ Checking if XML is available from EUPMC (since 6th March 20…	43647	1377	GBP	1377		Institutional_Prepayment	688.5	688.5	CC-BY		Unknown
Bristol	PMC6686967	31417335	10.1016/j.psychsport.2019.04.007	Longitudinal associations between parentsÂ’ motivations to exercise and their moderate-to-vigorous physical activity	Psychology of sport and exercise	FALSE	1469-0292, 1878-5476	1878-5476	2019-07-01T00:00:00Z	Unknown	Elsevier BV	not applicable	cc-by	cc-by	epmc_api	epmc_api	TRUE	TRUE	FALSE	TRUE	TRUE	TRUE	Added PMCID from EUPMC_x000D_ Confirmed fulltext is in EUPMC_x000D_ Confirmed is open access from EUPMC_x000D_ Added journal title from EUPMC_x000D_ Added issn from EUPMC_x000D_ Added eissn from EUPMC_x000D_ Added grants data from EUPMC_x000D_ Added date of publication from EUPMC_x000D_ Checking if XML is available from EUPMC (since 6th March 2020 this is always done for any article we have a PMC…	43581	1860	EUR	1617.4		None	1617.4	0	CC-BY		Unknown
Bristol	PMC6688790	31398184	10.1371/journal.pmed.1002868	Variation of all-cause and cause-specific mortality with body mass index in one million Swedish parent-son pairs: an instrumental variable analysis	PLoS medicine	TRUE	1549-1277, 1549-1676	1549-1676	2019-08-01T00:00:00Z	2019-08-09T00:00:00Z	Public Library of Science (PLoS)	not applicable	cc-by	cc-by	epmc_api	epmc_api	TRUE	TRUE	FALSE	TRUE	TRUE	TRUE	Added PMCID from EUPMC_x000D_ Added DOI from EUPMC_x000D_ Confirmed fulltext is in EUPMC_x000D_ Confirmed is open access from EUPMC_x000D_ Added journal title from EUPMC_x000D_ Added issn from EUPMC_x000D_ Added eissn from EUPMC_x000D_ Added grants data from EUPMC_x000D_ Added date of publication from EUPMC_x000D_ Added electronic publication date from EUPMC_x000D_ Checking if XML is available fr…	43712	3000	USD	2949.72		Institutional_Prepayment	1474.86	1474.86	CC-BY		Unknown
Bristol	PMC6692837	31397863	10.1001/jamanetworkopen.2019.8918	Association between age at puberty and bone accrual from 10 to 25 years of age	JAMA network open	TRUE	2574-3805	2574-3805	2019-08-01T00:00:00Z	2019-08-02T00:00:00Z	American Medical Association (AMA)	not applicable	cc-by	cc-by	epmc_api	epmc_api	TRUE	TRUE	FALSE	TRUE	TRUE	TRUE	Added PMCID from EUPMC_x000D_ Confirmed fulltext is in EUPMC_x000D_ Confirmed is open access from EUPMC_x000D_ Added journal title from EUPMC_x000D_ Added issn from EUPMC_x000D_ Added eissn from EUPMC_x000D_ Added grants data from EUPMC_x000D_ Added date of publication from EUPMC_x000D_ Added electronic publication date from EUPMC_x000D_ Checking if XML is available from EUPMC (since 6th March 20…	43641	3000	USD	2925.11		None	1462.56	1462.56	CC-BY		Unknown
Bristol	PMC6818523	31371484	10.1136/medhum-2018-011631	Disrupted breath, songlines of breathlessness: an interdisciplinary response	Medical humanities	FALSE	1468-215X, 1473-4265	1473-4265	2019-09-01T00:00:00Z	2019-08-01T00:00:00Z	BMJ	not applicable	cc-by	cc-by	epmc_api	epmc_api	TRUE	TRUE	FALSE	TRUE	TRUE	TRUE	Added PMCID from EUPMC_x000D_ Confirmed fulltext is in EUPMC_x000D_ Confirmed is open access from EUPMC_x000D_ Added journal title from EUPMC_x000D_ Added issn from EUPMC_x000D_ Added eissn from EUPMC_x000D_ Added grants data from EUPMC_x000D_ Added date of publication from EUPMC_x000D_ Added electronic publication date from EUPMC_x000D_ Checking if XML is available from EUPMC (since 6th March 20…	43663	2340	GBP	2340		Institutional_ membership discount	2340	0	CC-BY		Unknown
Bristol	PMC6892273	31356824	10.1016/j.neuropharm.2019.107728	Changes in excitatory and inhibitory receptor expression and network activity during induction and establishment of epilepsy in the rat Reduced Intensity Status Epilepticus (RISE) model	Neuropharmacology	FALSE	0028-3908, 1873-7064	1873-7064	2019-11-01T00:00:00Z	2019-07-26T00:00:00Z	Elsevier BV	not applicable	cc-by	cc-by	epmc_api	epmc_api	TRUE	TRUE	FALSE	TRUE	TRUE	TRUE	Added PMCID from EUPMC_x000D_ Confirmed fulltext is in EUPMC_x000D_ Confirmed is open access from EUPMC_x000D_ Added journal title from EUPMC_x000D_ Added issn from EUPMC_x000D_ Added eissn from EUPMC_x000D_ Added date of publication from EUPMC_x000D_ Added electronic publication date from EUPMC_x000D_ Checking if XML is available from EUPMC (since 6th March 2020 this is always done for any artic…	43708	2448	EUR	2599.64		Elsevier_Prepayment	1299.82	1299.82	CC-BY	Not in PMC yet - 07/11/2019	Unknown
Bristol	PMC6667688	31317374	10.1007/s10728-019-00376-8	Moral Distress and Austerity: An Avoidable Ethical Challenge in Healthcare	Health care analysis : HCA : journal of health philosophy and policy	FALSE	1065-3058, 1573-3394	1573-3394	2019-09-01T00:00:00Z	Unknown	Springer Science and Business Media LLC	not applicable	cc-by	cc-by	epmc_api	epmc_api	TRUE	TRUE	FALSE	TRUE	TRUE	TRUE	Added PMCID from EUPMC_x000D_ Confirmed fulltext is in EUPMC_x000D_ Confirmed is open access from EUPMC_x000D_ Added journal title from EUPMC_x000D_ Added issn from EUPMC_x000D_ Added eissn from EUPMC_x000D_ Added grants data from EUPMC_x000D_ Added date of publication from EUPMC_x000D_ Checking if XML is available from EUPMC (since 6th March 2020 this is always done for any article we have a PMC…	43693	2112	GBP	2112		None	2112	0	CC-BY		Unknown
Bristol	PMC6609916	31312760	10.1016/j.jacbts.2019.02.001	Successful Reconstruction of the Right Ventricular Outflow Tract by Implantation of Thymus Stem Cell Engineered Graft in Growing Swine	JACC. Basic to translational science	TRUE	2452-302X	2452-302X	2019-06-01T00:00:00Z	2019-06-24T00:00:00Z	Elsevier BV	not applicable	cc-by	cc-by	epmc_api	epmc_api	TRUE	TRUE	FALSE	TRUE	TRUE	TRUE	Added PMCID from EUPMC_x000D_ Confirmed fulltext is in EUPMC_x000D_ Confirmed is open access from EUPMC_x000D_ Added journal title from EUPMC_x000D_ Added issn from EUPMC_x000D_ Added eissn from EUPMC_x000D_ Added date of publication from EUPMC_x000D_ Added electronic publication date from EUPMC_x000D_ Checking if XML is available from EUPMC (since 6th March 2020 this is always done for any artic…	43600	3400	USD	3275.06		None	3275.06	0	CC-BY		Unknown
Bristol	PMC6859431	31276585	10.1093/hmg/ddz155	Integrating Mendelian randomization and multiple-trait colocalization to uncover cell-specific inflammatory drivers of autoimmune and atopic disease	Human molecular genetics	FALSE	0964-6906, 1460-2083	1460-2083	2019-10-01T00:00:00Z	Unknown	Oxford University Press (OUP)	not applicable	cc-by	cc-by	epmc_api	epmc_api	TRUE	TRUE	FALSE	TRUE	TRUE	TRUE	Added PMCID from EUPMC_x000D_ Confirmed fulltext is in EUPMC_x000D_ Confirmed is open access from EUPMC_x000D_ Added journal title from EUPMC_x000D_ Added issn from EUPMC_x000D_ Added eissn from EUPMC_x000D_ Added grants data from EUPMC_x000D_ Added date of publication from EUPMC_x000D_ Checking if XML is available from EUPMC (since 6th March 2020 this is always done for any article we have a PMC…	43651	1845.85	GBP	1845.85		Institutional_Prepayment	922.93	922.93	CC-BY	Awaiting PMC deposit, no license on PDF. Currently epub only, check after issue publication - 06/11/2019	Unknown
Bristol	PMC6639451	31272912	10.1016/S2215-0366(19)30214-7	Risk of suicide and repeat self-harm after hospital attendance for non-fatal self-harm in Sri Lanka: a cohort study	The lancet. Psychiatry	FALSE	2215-0366, 2215-0374	2215-0374	2019-08-01T00:00:00Z	2019-07-01T00:00:00Z	Elsevier BV	not applicable	cc-by	cc-by	epmc_api	epmc_api	TRUE	TRUE	FALSE	TRUE	TRUE	TRUE	Added PMCID from EUPMC_x000D_ Confirmed fulltext is in EUPMC_x000D_ Confirmed is open access from EUPMC_x000D_ Added journal title from EUPMC_x000D_ Added issn from EUPMC_x000D_ Added eissn from EUPMC_x000D_ Added grants data from EUPMC_x000D_ Added date of publication from EUPMC_x000D_ Added electronic publication date from EUPMC_x000D_ Checking if XML is available from EUPMC (since 6th March 20…	43623	5302.32	EUR	4610.71		None	4610.71	0	CC-BY		Unknown
Bristol	PMC6609387	31269926	10.1186/s12889-019-7102-9	A physical activity, nutrition and oral health intervention in nursery settings: Process evaluation of the NAP SACC UK feasibility cluster RCT	BMC public health	TRUE	1471-2458	1471-2458	2019-07-01T00:00:00Z	2019-07-03T00:00:00Z	Springer Science and Business Media LLC	not applicable	cc-by	cc-by	epmc_api	epmc_api	TRUE	TRUE	FALSE	TRUE	TRUE	TRUE	Added PMCID from EUPMC_x000D_ Confirmed fulltext is in EUPMC_x000D_ Confirmed is open access from EUPMC_x000D_ Added journal title from EUPMC_x000D_ Added issn from EUPMC_x000D_ Added eissn from EUPMC_x000D_ Added grants data from EUPMC_x000D_ Added date of publication from EUPMC_x000D_ Added electronic publication date from EUPMC_x000D_ Checking if XML is available from EUPMC (since 6th March 20…	43649	1164.5	GBP	1164.5		Institutional_Prepayment	582.25	582.25	CC-BY	MRC grant also co-funded by Wellcome Trust, Cancer Research, BHF, ESRC.	Unknown
Bristol	PMC6659375	31257439	10.1093/ije/dyz119	An integrative approach to detect epigenetic mechanisms that putatively mediate the influence of lifestyle exposures on disease susceptibility	International journal of epidemiology	FALSE	0300-5771, 1464-3685	1464-3685	2019-06-01T00:00:00Z	Unknown	Oxford University Press (OUP)	not applicable	cc-by	cc-by	epmc_api	epmc_api	TRUE	TRUE	FALSE	TRUE	TRUE	TRUE	Added PMCID from EUPMC_x000D_ Confirmed fulltext is in EUPMC_x000D_ Confirmed is open access from EUPMC_x000D_ Added journal title from EUPMC_x000D_ Added issn from EUPMC_x000D_ Added eissn from EUPMC_x000D_ Added grants data from EUPMC_x000D_ Added date of publication from EUPMC_x000D_ Checking if XML is available from EUPMC (since 6th March 2020 this is always done for any article we have a PMC…	43623	2252.45	GBP	2252.45		Institutional_Prepayment	1126.23	1126.23	CC-BY		Unknown
Bristol	PMC6604106	31251383	10.1001/jamanetworkopen.2019.6587	Genetic and Environmental Risk Factors Associated with Different Trajectories of Depression Symptoms from Adolescence to Young Adulthood	JAMA network open	TRUE	2574-3805	2574-3805	2019-06-01T00:00:00Z	2019-06-05T00:00:00Z	American Medical Association (AMA)	not applicable	cc-by	cc-by	epmc_api	epmc_api	TRUE	TRUE	FALSE	TRUE	TRUE	TRUE	Added PMCID from EUPMC_x000D_ Confirmed fulltext is in EUPMC_x000D_ Confirmed is open access from EUPMC_x000D_ Added journal title from EUPMC_x000D_ Added issn from EUPMC_x000D_ Added eissn from EUPMC_x000D_ Added grants data from EUPMC_x000D_ Added date of publication from EUPMC_x000D_ Added electronic publication date from EUPMC_x000D_ Checking if XML is available from EUPMC (since 6th March 20…	43605	2914.99	USD	2914.99		None	1457.5	1457.5	CC-BY		Unknown
Bristol	PMC6592406	31243001	10.1136/bmj.l2327	Investigating causal relationships between sleep traits and risk of breast cancer: a Mendelian randomization study	BMJ (Clinical research ed.)	FALSE	0959-8138, 1756-1833	1756-1833	2019-06-01T00:00:00Z	2019-06-26T00:00:00Z	BMJ	not applicable	cc-by	cc-by	epmc_api	epmc_api	TRUE	TRUE	FALSE	TRUE	TRUE	TRUE	Added PMCID from EUPMC_x000D_ Confirmed fulltext is in EUPMC_x000D_ Confirmed is open access from EUPMC_x000D_ Added journal title from EUPMC_x000D_ Added issn from EUPMC_x000D_ Added eissn from EUPMC_x000D_ Added grants data from EUPMC_x000D_ Added date of publication from EUPMC_x000D_ Added electronic publication date from EUPMC_x000D_ Checking if XML is available from EUPMC (since 6th March 20…	43590	3060	GBP	3060		Institutional_Prepayment	1530	1530	CC-BY		Unknown
Bristol	PMC6771952	31237382	10.1002/glia.23667	The role of sleep and wakefulness in myelin plasticity	Glia	FALSE	0894-1491, 1098-1136	1098-1136	2019-11-01T00:00:00Z	2019-06-25T00:00:00Z	Wiley	not applicable	cc-by	cc-by	epmc_api	epmc_api	TRUE	TRUE	FALSE	TRUE	TRUE	TRUE	Added PMCID from EUPMC_x000D_ Confirmed fulltext is in EUPMC_x000D_ Confirmed is open access from EUPMC_x000D_ Added journal title from EUPMC_x000D_ Added issn from EUPMC_x000D_ Added eissn from EUPMC_x000D_ Added grants data from EUPMC_x000D_ Added date of publication from EUPMC_x000D_ Added electronic publication date from EUPMC_x000D_ Checking if XML is available from EUPMC (since 6th March 20…	43635	3360	GBP	3360		None	3360	0	CC-BY		Unknown
Bristol	PMC6591304	31235808	10.1038/s41467-019-10630-1	Genome-wide analysis of dental caries and periodontitis combining clinical and self-reported data to CCC	Nature communications	TRUE	2041-1723	2041-1723	2019-06-01T00:00:00Z	2019-06-24T00:00:00Z	Springer Science and Business Media LLC	not applicable	cc-by	cc-by	epmc_api	epmc_api	TRUE	TRUE	FALSE	TRUE	TRUE	TRUE	Added PMCID from EUPMC_x000D_ Confirmed fulltext is in EUPMC_x000D_ Confirmed is open access from EUPMC_x000D_ Added journal title from EUPMC_x000D_ Added issn from EUPMC_x000D_ Added eissn from EUPMC_x000D_ Added grants data from EUPMC_x000D_ Added date of publication from EUPMC_x000D_ Added electronic publication date from EUPMC_x000D_ Checking if XML is available from EUPMC (since 6th March 20…	43630	4188	GBP	4188		None	2094	2094	CC-BY	Funders acknowledged in supplementary files only. Emailed Springer in an attempt to make funding explicit, author halted this and unable to pursue 21/08/2019	Unknown
Bristol	PMC6591830	31234813	10.1186/s12885-019-5776-0	Achieving a timely diagnosis for Teenagers and Young Adults with cancer: the ACE Â“Too Young to Get Cancer?Â” study	BMC cancer	TRUE	1471-2407	1471-2407	2019-06-01T00:00:00Z	2019-06-24T00:00:00Z	Springer Science and Business Media LLC	not applicable	cc-by	cc-by	epmc_api	epmc_api	TRUE	TRUE	FALSE	TRUE	TRUE	TRUE	Added PMCID from EUPMC_x000D_ Confirmed fulltext is in EUPMC_x000D_ Confirmed is open access from EUPMC_x000D_ Added journal title from EUPMC_x000D_ Added issn from EUPMC_x000D_ Added eissn from EUPMC_x000D_ Added grants data from EUPMC_x000D_ Added date of publication from EUPMC_x000D_ Added electronic publication date from EUPMC_x000D_ Checking if XML is available from EUPMC (since 6th March 20…	43623	1968	GBP	1968		None	1968	0	CC-BY		Unknown
Bristol	PMC6635125	31230546	10.1161/HYPERTENSIONAHA.119.12634	Hypertensive Disorders of Pregnancy and DNA Methylation in Newborns Findings From the Pregnancy and Childhood Epigenetics Consortium	Hypertension (Dallas, Tex. : 1979)	FALSE	0194-911X, 1524-4563	1524-4563	2019-08-01T00:00:00Z	2019-06-24T00:00:00Z	Ovid Technologies (Wolters Kluwer Health)	not applicable	cc-by	cc-by	epmc_api	epmc_api	TRUE	TRUE	FALSE	TRUE	TRUE	TRUE	Added PMCID from EUPMC_x000D_ Confirmed fulltext is in EUPMC_x000D_ Confirmed is open access from EUPMC_x000D_ Added journal title from EUPMC_x000D_ Added issn from EUPMC_x000D_ Added eissn from EUPMC_x000D_ Added grants data from EUPMC_x000D_ Added date of publication from EUPMC_x000D_ Added electronic publication date from EUPMC_x000D_ Checking if XML is available from EUPMC (since 6th March 20…	43623	4700	USD	4580.51		None	2290.26	2290.26	CC-BY	Funder information is in supplementary doc.	Unknown
Bristol	PMC6580571	31208381	10.1186/s12888-019-2166-8	GrandmothersÂ’ mental health is associated with grandchildrenÂ’s emotional and behavioral development: a three-generation prospective study in Brazil: GrandmothersÂ’ mental health and grandchildrenÂ’s development	BMC psychiatry	TRUE	1471-244X	1471-244X	2019-06-01T00:00:00Z	2019-06-17T00:00:00Z	Springer Science and Business Media LLC	not applicable	cc-by	cc-by	epmc_api	epmc_api	TRUE	TRUE	FALSE	TRUE	TRUE	TRUE	Added PMCID from EUPMC_x000D_ Confirmed fulltext is in EUPMC_x000D_ Confirmed is open access from EUPMC_x000D_ Added journal title from EUPMC_x000D_ Added issn from EUPMC_x000D_ Added eissn from EUPMC_x000D_ Added grants data from EUPMC_x000D_ Added date of publication from EUPMC_x000D_ Added electronic publication date from EUPMC_x000D_ Checking if XML is available from EUPMC (since 6th March 20…	43628	1944	GBP	1944		None	1944	0	CC-BY		Unknown
Bristol	PMC6542436	31206071	10.1136/bmjpo-2018-000389	The impact of co-occuring hearing and visual difficulties in childhood on educational outcomes: a longitudinal cohort study	BMJ paediatrics open	TRUE	2399-9772	2399-9772	2019-01-01T00:00:00Z	2019-04-03T00:00:00Z	BMJ	not applicable	cc-by	cc-by	epmc_api	epmc_api	TRUE	TRUE	FALSE	TRUE	TRUE	TRUE	Added PMCID from EUPMC_x000D_ Confirmed fulltext is in EUPMC_x000D_ Confirmed is open access from EUPMC_x000D_ Added journal title from EUPMC_x000D_ Added issn from EUPMC_x000D_ Added eissn from EUPMC_x000D_ Added grants data from EUPMC_x000D_ Added date of publication from EUPMC_x000D_ Added electronic publication date from EUPMC_x000D_ Checking if XML is available from EUPMC (since 6th March 20…	43524	1377	GBP	1377		Institutional_Prepayment	688.5	688.5	CC-BY		Unknown
Bristol	PMC6563960	31194768	10.1371/journal.pone.0217473	Language use and suicide: an online cross-sectional survey	PloS one	TRUE	1932-6203	1932-6203	2019-01-01T00:00:00Z	2019-06-13T00:00:00Z	Public Library of Science (PLoS)	not applicable	cc-by	cc-by	epmc_api	epmc_api	TRUE	TRUE	FALSE	TRUE	TRUE	TRUE	Added PMCID from EUPMC_x000D_ Confirmed fulltext is in EUPMC_x000D_ Confirmed is open access from EUPMC_x000D_ Added journal title from EUPMC_x000D_ Added issn from EUPMC_x000D_ Added eissn from EUPMC_x000D_ Added grants data from EUPMC_x000D_ Added date of publication from EUPMC_x000D_ Added electronic publication date from EUPMC_x000D_ Checking if XML is available from EUPMC (since 6th March 20…	43713	1595	USD	1613.92		None	1613.92	0	CC-BY		Unknown
Bristol	PMC6581915	31167131	10.1016/j.celrep.2019.05.029	Proteolytic and opportunisitic breaching of the basement membrane zone by immune cells during tumour initiation	Cell reports	TRUE	2211-1247	2211-1247	2019-06-01T00:00:00Z	Unknown	Elsevier BV	not applicable	cc-by	cc-by	epmc_api	epmc_api	TRUE	TRUE	FALSE	TRUE	TRUE	TRUE	Added PMCID from EUPMC_x000D_ Confirmed fulltext is in EUPMC_x000D_ Confirmed is open access from EUPMC_x000D_ Added journal title from EUPMC_x000D_ Added issn from EUPMC_x000D_ Added eissn from EUPMC_x000D_ Added grants data from EUPMC_x000D_ Added date of publication from EUPMC_x000D_ Checking if XML is available from EUPMC (since 6th March 2020 this is always done for any article we have a PMC…	43600	4280	EUR	4626.65		None	4626.65	0	CC-BY		Unknown
Bristol	PMC6603940	31159176	10.3390/ijerph16111929	International comparison of the levels and potential correlates of objectively measured sedentary time and physical activity among three-to-four-year-old children	International journal of environmental research and public health	TRUE	1661-7827, 1660-4601	1660-4601	2019-05-01T00:00:00Z	2019-05-31T00:00:00Z	MDPI AG	not applicable	cc-by	cc-by	epmc_api	epmc_api	TRUE	TRUE	FALSE	TRUE	TRUE	TRUE	Added PMCID from EUPMC_x000D_ Confirmed fulltext is in EUPMC_x000D_ Confirmed is open access from EUPMC_x000D_ Added journal title from EUPMC_x000D_ Added issn from EUPMC_x000D_ Added eissn from EUPMC_x000D_ Added grants data from EUPMC_x000D_ Added date of publication from EUPMC_x000D_ Added electronic publication date from EUPMC_x000D_ Checking if XML is available from EUPMC (since 6th March 20…	43661	1510.86	GBP	1510.86		None	755.43	755.43	CC-BY	Joint funding (MR/KO232331/1) from the BHF, CRUK, ESRC, MRC, the Welsh Government and the Wellcome Trust, under the auspices of the UK Clinical Research Collaboration.	Unknown
Bristol	PMC6543203	31149708	10.1093/jn/nxz023	Dietary patterns are not consistently associated with variability in blood lead concentrations in pregnant British women	The Journal of nutrition	FALSE	0022-3166, 1541-6100	1541-6100	2019-06-01T00:00:00Z	Unknown	Oxford University Press (OUP)	not applicable	cc-by	cc-by	epmc_api	epmc_api	TRUE	TRUE	FALSE	TRUE	TRUE	TRUE	Added PMCID from EUPMC_x000D_ Confirmed fulltext is in EUPMC_x000D_ Confirmed is open access from EUPMC_x000D_ Added journal title from EUPMC_x000D_ Added issn from EUPMC_x000D_ Added eissn from EUPMC_x000D_ Added grants data from EUPMC_x000D_ Added date of publication from EUPMC_x000D_ Checking if XML is available from EUPMC (since 6th March 2020 this is always done for any article we have a PMC…	43537	4411.2	GBP	4411.2		None	4411.2	0	CC-BY		Unknown
Bristol	PMC6538058	31133595	10.1136/bmjopen-2018-028480	Real-world Ethics in Palliative Care: Protocol for a Systematic Review of the Ethical Challenges Reported by Specialist Palliative Care Practitioners in their Clinical Practice	BMJ open	TRUE	2044-6055	2044-6055	2019-05-01T00:00:00Z	2019-05-27T00:00:00Z	BMJ	not applicable	cc-by	cc-by	epmc_api	epmc_api	TRUE	TRUE	FALSE	TRUE	TRUE	TRUE	Added PMCID from EUPMC_x000D_ Confirmed fulltext is in EUPMC_x000D_ Confirmed is open access from EUPMC_x000D_ Added journal title from EUPMC_x000D_ Added issn from EUPMC_x000D_ Added eissn from EUPMC_x000D_ Added grants data from EUPMC_x000D_ Added date of publication from EUPMC_x000D_ Added electronic publication date from EUPMC_x000D_ Checking if XML is available from EUPMC (since 6th March 20…	43587	1377	GBP	1377		Institutional_Prepayment	1377	0	CC-BY	Not in PMC. Publisher emailed twice - 28/10/2019	Unknown
Bristol	PMC6528996	31112535	10.1371/journal.pone.0213116	Parkin-mediated ubiquitination contributes to the constitutive turnover of mitochondrial fission factor (Mff)	PloS one	TRUE	1932-6203	1932-6203	2019-01-01T00:00:00Z	2019-05-21T00:00:00Z	Public Library of Science (PLoS)	not applicable	cc-by	cc-by	epmc_api	epmc_api	TRUE	TRUE	FALSE	TRUE	TRUE	TRUE	Added PMCID from EUPMC_x000D_ Confirmed fulltext is in EUPMC_x000D_ Confirmed is open access from EUPMC_x000D_ Added journal title from EUPMC_x000D_ Added issn from EUPMC_x000D_ Added eissn from EUPMC_x000D_ Added grants data from EUPMC_x000D_ Added date of publication from EUPMC_x000D_ Added electronic publication date from EUPMC_x000D_ Checking if XML is available from EUPMC (since 6th March 20…	43628	1595	USD	1535.32		Institutional_Prepayment	383.83	767.66	CC-BY	Over-committed, interim COAF report sent 31.05.19 requesting top-up, payment settled while waiting on confirmation of Wellcome supplement so 25% charged to BHF directly, 50% UKRI, 25% COAF	Unknown
Bristol	PMC6572055	31091825	10.3390/ijerph16101697	Physical Activity during the School Holidays: Parent Perceptions and Practical Considerations	International journal of environmental research and public health	TRUE	1661-7827, 1660-4601	1660-4601	2019-05-01T00:00:00Z	2019-05-14T00:00:00Z	MDPI AG	not applicable	cc-by	cc-by	epmc_api	epmc_api	TRUE	TRUE	FALSE	TRUE	TRUE	TRUE	Added PMCID from EUPMC_x000D_ Confirmed fulltext is in EUPMC_x000D_ Confirmed is open access from EUPMC_x000D_ Added journal title from EUPMC_x000D_ Added issn from EUPMC_x000D_ Added eissn from EUPMC_x000D_ Added grants data from EUPMC_x000D_ Added date of publication from EUPMC_x000D_ Added electronic publication date from EUPMC_x000D_ Checking if XML is available from EUPMC (since 6th March 20…	43600	1451.02	GBP	1451.02		None	1451.02	0	CC-BY		Unknown
Bristol	PMC6476918	31040767	10.3389/fnmol.2019.00090	Wnt signalling is a major determinant of neuroblastoma cell lineages	Frontiers in molecular neuroscience	TRUE	1662-5099	1662-5099	2019-01-01T00:00:00Z	2019-04-16T00:00:00Z	Frontiers Media SA	not applicable	cc-by	cc-by	epmc_api	epmc_api	TRUE	TRUE	FALSE	TRUE	TRUE	TRUE	Added PMCID from EUPMC_x000D_ Confirmed fulltext is in EUPMC_x000D_ Confirmed is open access from EUPMC_x000D_ Added journal title from EUPMC_x000D_ Added issn from EUPMC_x000D_ Added eissn from EUPMC_x000D_ Added grants data from EUPMC_x000D_ Added date of publication from EUPMC_x000D_ Added electronic publication date from EUPMC_x000D_ Checking if XML is available from EUPMC (since 6th March 20…	43556	2950	USD	2804.22		None	1402.11	1402.11	CC-BY		Unknown
Bristol	PMC6491034	31036155	10.7554/eLife.44252	The C-terminal Helix 9 motif in rat cannabinoid receptor type 1 regulates axonal trafficking and surface expression	eLife	TRUE	2050-084X	2050-084X	2019-04-01T00:00:00Z	2019-04-30T00:00:00Z	eLife Sciences Publications, Ltd	not applicable	cc-by	cc-by	epmc_api	epmc_api	TRUE	TRUE	FALSE	TRUE	TRUE	TRUE	Added PMCID from EUPMC_x000D_ Confirmed fulltext is in EUPMC_x000D_ Confirmed is open access from EUPMC_x000D_ Added journal title from EUPMC_x000D_ Added issn from EUPMC_x000D_ Added eissn from EUPMC_x000D_ Added grants data from EUPMC_x000D_ Added date of publication from EUPMC_x000D_ Added electronic publication date from EUPMC_x000D_ Checking if XML is available from EUPMC (since 6th March 20…	43606	2434.91	USD	2434.91		None	1217.46	1217.46	CC-BY		Unknown
Bristol	PMC6489253	31036072	10.1186/s13287-019-1231-z	Vimentin expression is retained in erythroid cells differentiated from human iPSC and ESC and indicates dysregulation in these cells early in differentiation	Stem cell research & therapy	TRUE	1757-6512	1757-6512	2019-04-01T00:00:00Z	2019-04-29T00:00:00Z	Springer Science and Business Media LLC	not applicable	cc-by	cc-by	epmc_api	epmc_api	TRUE	TRUE	FALSE	TRUE	TRUE	TRUE	Added PMCID from EUPMC_x000D_ Confirmed fulltext is in EUPMC_x000D_ Confirmed is open access from EUPMC_x000D_ Added journal title from EUPMC_x000D_ Added issn from EUPMC_x000D_ Added eissn from EUPMC_x000D_ Added grants data from EUPMC_x000D_ Added date of publication from EUPMC_x000D_ Added electronic publication date from EUPMC_x000D_ Checking if XML is available from EUPMC (since 6th March 20…	43567	2088	GBP	2088		None	2088	0	CC-BY		Unknown
Bristol	PMC6458410	31031995	10.1098/rsos.181133	Locus of control is associated with tobacco and alcohol consumption in young adults of the Avon Longitudinal Study of Parents and Children	Royal Society open science	TRUE	2054-5703	2054-5703	2019-03-01T00:00:00Z	2019-03-27T00:00:00Z	The Royal Society	not applicable	cc-by	cc-by	epmc_api	epmc_api	TRUE	TRUE	FALSE	TRUE	TRUE	TRUE	Added PMCID from EUPMC_x000D_ Confirmed fulltext is in EUPMC_x000D_ Confirmed is open access from EUPMC_x000D_ Added journal title from EUPMC_x000D_ Added issn from EUPMC_x000D_ Added eissn from EUPMC_x000D_ Added grants data from EUPMC_x000D_ Added date of publication from EUPMC_x000D_ Added electronic publication date from EUPMC_x000D_ Checking if XML is available from EUPMC (since 6th March 20…	43523	810	GBP	810		Institutional_Prepayment	405	405	CC-BY		Unknown
Bristol	PMC6458425	31031992	10.1098/rsos.181049	Schizophrenia risk and reproductive success: A Mendelian randomization study	Royal Society open science	TRUE	2054-5703	2054-5703	2019-03-01T00:00:00Z	2019-03-06T00:00:00Z	The Royal Society	not applicable	cc-by	cc-by	epmc_api	epmc_api	TRUE	TRUE	FALSE	TRUE	TRUE	TRUE	Added PMCID from EUPMC_x000D_ Confirmed fulltext is in EUPMC_x000D_ Confirmed is open access from EUPMC_x000D_ Added journal title from EUPMC_x000D_ Added issn from EUPMC_x000D_ Added eissn from EUPMC_x000D_ Added grants data from EUPMC_x000D_ Added date of publication from EUPMC_x000D_ Added electronic publication date from EUPMC_x000D_ Checking if XML is available from EUPMC (since 6th March 20…	43507	810	GBP	810		Institutional_Prepayment	405	405	CC-BY		Unknown
Bristol	PMC6459952	31024624	10.3389/fgene.2019.00314	Investigating possible trans/intergenerational associations with obesity in young adults using an exposome approach	Frontiers in Genetics	TRUE	1664-8021	1664-8021	2019-01-01T00:00:00Z	2019-04-05T00:00:00Z	Frontiers Media SA	not applicable	cc-by	cc-by	epmc_api	epmc_api	TRUE	TRUE	FALSE	TRUE	TRUE	TRUE	Added PMCID from EUPMC_x000D_ Confirmed fulltext is in EUPMC_x000D_ Confirmed is open access from EUPMC_x000D_ Added journal title from EUPMC_x000D_ Added issn from EUPMC_x000D_ Added eissn from EUPMC_x000D_ Added grants data from EUPMC_x000D_ Added date of publication from EUPMC_x000D_ Added electronic publication date from EUPMC_x000D_ Checking if XML is available from EUPMC (since 6th March 20…	43550	2490	USD	2338.18		None	1169.09	1169.09	CC-BY		Unknown
Bristol	PMC6478852	31015587	10.1038/s41598-019-42904-5	Levodopa does not affect expression of reinforcement learning in older adults	Scientific reports	TRUE	2045-2322	2045-2322	2019-04-01T00:00:00Z	2019-04-23T00:00:00Z	Springer Science and Business Media LLC	not applicable	cc-by	cc-by	epmc_api	epmc_api	TRUE	TRUE	FALSE	TRUE	TRUE	TRUE	Added PMCID from EUPMC_x000D_ Confirmed fulltext is in EUPMC_x000D_ Confirmed is open access from EUPMC_x000D_ Added journal title from EUPMC_x000D_ Added issn from EUPMC_x000D_ Added eissn from EUPMC_x000D_ Added grants data from EUPMC_x000D_ Added date of publication from EUPMC_x000D_ Added electronic publication date from EUPMC_x000D_ Checking if XML is available from EUPMC (since 6th March 20…	43566	1548	GBP	1548		None	774	774	CC-BY		Unknown
Bristol	PMC6693884	31006025	10.1093/ije/dyz063	Data Resource Profile: the ALSPAC birth cohort as a platform to study the relationship of environment and health and social factors	International journal of epidemiology	FALSE	0300-5771, 1464-3685	1464-3685	2019-08-01T00:00:00Z	Unknown	Oxford University Press (OUP)	not applicable	cc-by	cc-by	epmc_api	epmc_api	TRUE	TRUE	FALSE	TRUE	TRUE	TRUE	Added PMCID from EUPMC_x000D_ Confirmed fulltext is in EUPMC_x000D_ Confirmed is open access from EUPMC_x000D_ Added journal title from EUPMC_x000D_ Added issn from EUPMC_x000D_ Added eissn from EUPMC_x000D_ Added grants data from EUPMC_x000D_ Added date of publication from EUPMC_x000D_ Checking if XML is available from EUPMC (since 6th March 2020 this is always done for any article we have a PMC…	43594	2252.45	GBP	2252.45		Institutional_Prepayment	1126.23	1126.23	CC-BY		Unknown
Bristol	PMC6518196	30995723	10.3390/jcm8040517	Bicuspid Aortic Valve Alters Aortic Protein Expression Profile in Neonatal Coarctation Patients	Journal of clinical medicine	TRUE	2077-0383	2077-0383	2019-04-01T00:00:00Z	2019-04-16T00:00:00Z	MDPI AG	not applicable	cc-by	cc-by	epmc_api	epmc_api	TRUE	TRUE	FALSE	TRUE	TRUE	TRUE	Added PMCID from EUPMC_x000D_ Confirmed fulltext is in EUPMC_x000D_ Confirmed is open access from EUPMC_x000D_ Added journal title from EUPMC_x000D_ Added issn from EUPMC_x000D_ Added eissn from EUPMC_x000D_ Added grants data from EUPMC_x000D_ Added date of publication from EUPMC_x000D_ Added electronic publication date from EUPMC_x000D_ Checking if XML is available from EUPMC (since 6th March 20…	43579	1489.92	GBP	1489.92		None	1489.92	0	CC-BY		Unknown
Bristol	PMC6450144	30984766	10.3389/fmolb.2019.00018	Analysis of ?-dystroglycan/LG domain binding modes: investigating protein motifs that regulate the affinity of isolated LG domains	Frontiers in Molecular Biosciences	TRUE	2296-889X	2296-889X	2019-01-01T00:00:00Z	2019-03-29T00:00:00Z	Frontiers Media SA	not applicable	cc-by	cc-by	epmc_api	epmc_api	TRUE	TRUE	FALSE	TRUE	TRUE	TRUE	Added PMCID from EUPMC_x000D_ Confirmed fulltext is in EUPMC_x000D_ Confirmed is open access from EUPMC_x000D_ Added journal title from EUPMC_x000D_ Added issn from EUPMC_x000D_ Added eissn from EUPMC_x000D_ Added grants data from EUPMC_x000D_ Added date of publication from EUPMC_x000D_ Added electronic publication date from EUPMC_x000D_ Checking if XML is available from EUPMC (since 6th March 20…	43536	1900	USD	1805		None	1805	0	CC-BY		Unknown
Bristol	PMC6459529	30973885	10.1371/journal.pone.0213331	Protective role of the deSUMOylating enzyme SENP3 in myocardial ischemia-reperfusion injury	PloS one	TRUE	1932-6203	1932-6203	2019-01-01T00:00:00Z	2019-04-11T00:00:00Z	Public Library of Science (PLoS)	not applicable	cc-by	cc-by	epmc_api	epmc_api	TRUE	TRUE	FALSE	TRUE	TRUE	TRUE	Added PMCID from EUPMC_x000D_ Confirmed fulltext is in EUPMC_x000D_ Confirmed is open access from EUPMC_x000D_ Added journal title from EUPMC_x000D_ Added issn from EUPMC_x000D_ Added eissn from EUPMC_x000D_ Added grants data from EUPMC_x000D_ Added date of publication from EUPMC_x000D_ Added electronic publication date from EUPMC_x000D_ Checking if XML is available from EUPMC (since 6th March 20…	43617	1595	USD	1476.96		Institutional_Prepayment	738.48	738.48	CC-BY		Unknown
Bristol	PMC6457575	30969984	10.1371/journal.pone.0214610	Tumor growth suppression using a combination of taxol-based therapy and GSK3 inhibition in non-small cell lung cancer	PloS one	TRUE	1932-6203	1932-6203	2019-01-01T00:00:00Z	2019-04-10T00:00:00Z	Public Library of Science (PLoS)	not applicable	cc-by	cc-by	epmc_api	epmc_api	TRUE	TRUE	FALSE	TRUE	TRUE	TRUE	Added PMCID from EUPMC_x000D_ Confirmed fulltext is in EUPMC_x000D_ Confirmed is open access from EUPMC_x000D_ Added journal title from EUPMC_x000D_ Added issn from EUPMC_x000D_ Added eissn from EUPMC_x000D_ Added grants data from EUPMC_x000D_ Added date of publication from EUPMC_x000D_ Added electronic publication date from EUPMC_x000D_ Checking if XML is available from EUPMC (since 6th March 20…	43606	1595	USD	1553.47		None	1553.47	0	CC-BY		Unknown
Bristol	PMC6444855	30940111	10.1186/s12889-019-6624-5	A life fulfilled: positively influencing physical activity in older adults Â– a systematic review and meta-ethnography	BMC public health	TRUE	1471-2458	1471-2458	2019-04-01T00:00:00Z	2019-04-02T00:00:00Z	Springer Science and Business Media LLC	not applicable	cc-by	cc-by	epmc_api	epmc_api	TRUE	TRUE	FALSE	TRUE	TRUE	TRUE	Added PMCID from EUPMC_x000D_ Confirmed fulltext is in EUPMC_x000D_ Confirmed is open access from EUPMC_x000D_ Added journal title from EUPMC_x000D_ Added issn from EUPMC_x000D_ Added eissn from EUPMC_x000D_ Added grants data from EUPMC_x000D_ Added date of publication from EUPMC_x000D_ Added electronic publication date from EUPMC_x000D_ Checking if XML is available from EUPMC (since 6th March 20…	43557	1164.5	GBP	1164.5		Institutional_Prepayment	582.25	582.25	CC-BY	Funding from the BHF, CRUK, ESRC (RES-590-28-0005), MRC, the Welsh Assembly Government and the Wellcome Trust (WT087640MA), under the auspices of the UK Clinical Research Collaboration	Unknown
Bristol	PMC6618074	30924564	10.1111/apa.14800	Why results from Bayesian statistical analyses of clinical trials with a strong prior and small sample sizes may be misleading. The case of the NICHD Neonatal Research Network Late Hypothermia Trial	Acta paediatrica (Oslo, Norway : 1992)	FALSE	0803-5253, 1651-2227	1651-2227	2019-07-01T00:00:00Z	2019-04-11T00:00:00Z	Wiley	not applicable	cc-by	cc-by	epmc_api	epmc_api	TRUE	TRUE	FALSE	TRUE	TRUE	TRUE	Added PMCID from EUPMC_x000D_ Confirmed fulltext is in EUPMC_x000D_ Confirmed is open access from EUPMC_x000D_ Added journal title from EUPMC_x000D_ Added issn from EUPMC_x000D_ Added eissn from EUPMC_x000D_ Added grants data from EUPMC_x000D_ Added date of publication from EUPMC_x000D_ Added electronic publication date from EUPMC_x000D_ Checking if XML is available from EUPMC (since 6th March 20…	43556	1800	GBP	1800		Institutional_Prepayment	900	900	CC-BY		Unknown
Bristol	PMC6784856	30921005	10.1097/CEJ.0000000000000502	Effect of green tea and lycopene on the insulin-like growth factor system (IGFs): the ProDiet randomised controlled trial	European journal of cancer prevention : the official journal of the European Cancer Prevention Organisation (ECP)	FALSE	0959-8278, 1473-5709	1473-5709	2019-11-01T00:00:00Z	Unknown	Ovid Technologies (Wolters Kluwer Health)	not applicable	cc-by	cc-by	epmc_api	epmc_api	TRUE	TRUE	FALSE	TRUE	TRUE	TRUE	Added PMCID from EUPMC_x000D_ Confirmed fulltext is in EUPMC_x000D_ Confirmed is open access from EUPMC_x000D_ Added journal title from EUPMC_x000D_ Added issn from EUPMC_x000D_ Added eissn from EUPMC_x000D_ Added grants data from EUPMC_x000D_ Added date of publication from EUPMC_x000D_ Checking if XML is available from EUPMC (since 6th March 2020 this is always done for any article we have a PMC…	43565	2850	USD	2697.95		None	2697.95	0	CC-BY	Not in PMC. E Pub - 28/10/2019	Unknown
Bristol	PMC6541910	30898509	10.1016/j.cca.2019.03.1617	Genetic determinants of circulating haptoglobin concentration	Clinica chimica acta; international journal of clinical chemistry	FALSE	0009-8981, 1873-3492	1873-3492	2019-07-01T00:00:00Z	2019-03-18T00:00:00Z	Elsevier BV	not applicable	cc-by	cc-by	epmc_api	epmc_api	TRUE	TRUE	FALSE	TRUE	TRUE	TRUE	Added PMCID from EUPMC_x000D_ Confirmed fulltext is in EUPMC_x000D_ Confirmed is open access from EUPMC_x000D_ Added journal title from EUPMC_x000D_ Added issn from EUPMC_x000D_ Added eissn from EUPMC_x000D_ Added grants data from EUPMC_x000D_ Added date of publication from EUPMC_x000D_ Added electronic publication date from EUPMC_x000D_ Checking if XML is available from EUPMC (since 6th March 20…	43556	2826	EUR	3001.06		Elsevier_Prepayment	1500.53	1500.53	CC-BY		Unknown
Bristol	PMC6563455	30891835	10.1111/add.14575	Associations of Child and Adolescent Anxiety with Later Alcohol Use and Disorders: A Systematic Review and Meta-Analysis of Prospective Cohort Studies	Addiction (Abingdon, England)	FALSE	0965-2140, 1360-0443	1360-0443	2019-06-01T00:00:00Z	2019-03-19T00:00:00Z	Wiley	not applicable	cc-by	cc-by	epmc_api	epmc_api	TRUE	TRUE	FALSE	TRUE	TRUE	TRUE	Added PMCID from EUPMC_x000D_ Confirmed fulltext is in EUPMC_x000D_ Confirmed is open access from EUPMC_x000D_ Added journal title from EUPMC_x000D_ Added issn from EUPMC_x000D_ Added eissn from EUPMC_x000D_ Added grants data from EUPMC_x000D_ Added date of publication from EUPMC_x000D_ Added electronic publication date from EUPMC_x000D_ Checking if XML is available from EUPMC (since 6th March 20…	43522	1980	GBP	1980		Institutional_Prepayment	990	990	CC-BY		Unknown
Bristol	PMC6436726	30883414	10.1213/ANE.0000000000004052	Assessing long-term neurodevelopmental outcome following general anesthesia in early childhood: challenges and opportunities	Anesthesia and analgesia	FALSE	0003-2999, 1526-7598	1526-7598	2019-04-01T00:00:00Z	Unknown	Ovid Technologies (Wolters Kluwer Health)	not applicable	cc-by	cc-by	epmc_api	epmc_api	TRUE	TRUE	FALSE	TRUE	TRUE	TRUE	Added PMCID from EUPMC_x000D_ Confirmed fulltext is in EUPMC_x000D_ Confirmed is open access from EUPMC_x000D_ Added journal title from EUPMC_x000D_ Added issn from EUPMC_x000D_ Added eissn from EUPMC_x000D_ Added grants data from EUPMC_x000D_ Added date of publication from EUPMC_x000D_ Checking if XML is available from EUPMC (since 6th March 2020 this is always done for any article we have a PMC…	43521	4100	USD	3822.08		None	3822.08	0	CC-BY	Deposited in PMC behind embargo, publisher's emailed 3 times (17/07/2019, 20/08/2019 and finally on 28/10/2019)	Unknown
Bristol	PMC6510928	30880223	10.1016/j.cellsig.2019.03.015	Characterisation of the Ral GTPase inhibitor RBC8 in human and mouse platelets	Cellular signalling	FALSE	0898-6568, 1873-3913	1873-3913	2019-07-01T00:00:00Z	2019-03-14T00:00:00Z	Elsevier BV	not applicable	cc-by	cc-by	epmc_api	epmc_api	TRUE	FALSE	FALSE	FALSE	TRUE	FALSE	Added PMCID from EUPMC_x000D_ Confirmed fulltext is in EUPMC_x000D_ This article is not open access according to EUPMC, but since 6th March 2020 we take this to mean only that the publisher did not indicate to EUPMC that it can be included in their Open Access subset - it may well still be an OA article._x000D_ Added journal title from EUPMC_x000D_ Added issn from EUPMC_x000D_ Added eissn from EU…	43544	2700	EUR	2909.84		None	2909.84	0	CC-BY		Unknown
Bristol	PMC6547017	30878639	10.1016/j.jclinepi.2019.02.016	The proportion of missing data should not be used to guide decisions on multiple imputation	Journal of clinical epidemiology	FALSE	0895-4356, 1878-5921	1878-5921	2019-06-01T00:00:00Z	2019-03-13T00:00:00Z	Elsevier BV	not applicable	cc-by	cc-by	epmc_api	epmc_api	TRUE	TRUE	FALSE	TRUE	TRUE	TRUE	Added PMCID from EUPMC_x000D_ Confirmed fulltext is in EUPMC_x000D_ Confirmed is open access from EUPMC_x000D_ Added journal title from EUPMC_x000D_ Added issn from EUPMC_x000D_ Added eissn from EUPMC_x000D_ Added grants data from EUPMC_x000D_ Added date of publication from EUPMC_x000D_ Added electronic publication date from EUPMC_x000D_ Checking if XML is available from EUPMC (since 6th March 20…	43555	2403	EUR	2551.86		Elsevier_Prepayment	1275.93	1275.93	CC-BY		Unknown
Bristol	PMC6461198	30878481	10.1016/j.jmb.2019.03.007	A High-Resolution Luminescent Assay for Rapid and Continuous Monitoring of Protein Translocation Across Biological Membranes	Journal of molecular biology	FALSE	0022-2836, 1089-8638	1089-8638	2019-04-01T00:00:00Z	2019-03-13T00:00:00Z	Elsevier BV	not applicable	cc-by	cc-by	epmc_api	epmc_api	TRUE	FALSE	FALSE	FALSE	TRUE	FALSE	Added PMCID from EUPMC_x000D_ Confirmed fulltext is in EUPMC_x000D_ This article is not open access according to EUPMC, but since 6th March 2020 we take this to mean only that the publisher did not indicate to EUPMC that it can be included in their Open Access subset - it may well still be an OA article._x000D_ Added journal title from EUPMC_x000D_ Added issn from EUPMC_x000D_ Added eissn from EU…	43555	1989	EUR	2112.22		Elsevier_Prepayment	1056.11	1056.11	CC-BY		Unknown
Bristol	PMC6430025	30852545	10.1136/bmjopen-2018-025227	Evaluating 3D-printed models of coronary anomalies: a survey among clinicians and researchers at a university hospital in the UK	BMJ open	TRUE	2044-6055	2044-6055	2019-03-01T00:00:00Z	2019-03-08T00:00:00Z	BMJ	not applicable	cc-by	cc-by	epmc_api	epmc_api	TRUE	TRUE	FALSE	TRUE	TRUE	TRUE	Added PMCID from EUPMC_x000D_ Confirmed fulltext is in EUPMC_x000D_ Confirmed is open access from EUPMC_x000D_ Added journal title from EUPMC_x000D_ Added issn from EUPMC_x000D_ Added eissn from EUPMC_x000D_ Added grants data from EUPMC_x000D_ Added date of publication from EUPMC_x000D_ Added electronic publication date from EUPMC_x000D_ Checking if XML is available from EUPMC (since 6th March 20…	43497	1620	GBP	1620		Institutional_ membership discount	1620	0	CC-BY		Unknown
Bristol	PMC6400940	30837455	10.1038/s41467-019-08923-6	Genome wide analysis for mouth ulcers identifies associations at immune regulatory loci	Nature communications	TRUE	2041-1723	2041-1723	2019-03-01T00:00:00Z	2019-03-05T00:00:00Z	Springer Science and Business Media LLC	not applicable	cc-by	cc-by	epmc_api	epmc_api	TRUE	TRUE	FALSE	TRUE	TRUE	TRUE	Added PMCID from EUPMC_x000D_ Confirmed fulltext is in EUPMC_x000D_ Confirmed is open access from EUPMC_x000D_ Added journal title from EUPMC_x000D_ Added issn from EUPMC_x000D_ Added eissn from EUPMC_x000D_ Added grants data from EUPMC_x000D_ Added date of publication from EUPMC_x000D_ Added electronic publication date from EUPMC_x000D_ Checking if XML is available from EUPMC (since 6th March 20…	43510	4188	GBP	4188		None	2094	2094	CC-BY		Unknown
Bristol	PMC6400585	30835202	10.7554/eLife.43657	An atlas of polygenic risk score associations to highlight putative causal relationships across the human phenome	eLife	TRUE	2050-084X	2050-084X	2019-03-01T00:00:00Z	2019-03-05T00:00:00Z	eLife Sciences Publications, Ltd	not applicable	cc-by	cc-by	epmc_api	epmc_api	TRUE	TRUE	FALSE	TRUE	TRUE	TRUE	Added PMCID from EUPMC_x000D_ Confirmed fulltext is in EUPMC_x000D_ Confirmed is open access from EUPMC_x000D_ Added journal title from EUPMC_x000D_ Added issn from EUPMC_x000D_ Added eissn from EUPMC_x000D_ Added grants data from EUPMC_x000D_ Added date of publication from EUPMC_x000D_ Added electronic publication date from EUPMC_x000D_ Checking if XML is available from EUPMC (since 6th March 20…	43570	3000	USD	2364.08		None	1182.04	1182.04	CC-BY		Unknown
Bristol	PMC6446223	30827758	10.1016/j.drugalcdep.2019.01.007	Prenatal alcohol exposure and offspring mental health: A systematic review	Drug and alcohol dependence	FALSE	0376-8716, 1879-0046	1879-0046	2019-04-01T00:00:00Z	2019-02-28T00:00:00Z	Elsevier BV	not applicable	cc-by	cc-by	epmc_api	epmc_api	TRUE	TRUE	FALSE	TRUE	TRUE	TRUE	Added PMCID from EUPMC_x000D_ Confirmed fulltext is in EUPMC_x000D_ Confirmed is open access from EUPMC_x000D_ Added journal title from EUPMC_x000D_ Added issn from EUPMC_x000D_ Added eissn from EUPMC_x000D_ Added grants data from EUPMC_x000D_ Added date of publication from EUPMC_x000D_ Added electronic publication date from EUPMC_x000D_ Checking if XML is available from EUPMC (since 6th March 20…	43524	2484	EUR	2637.88		Elsevier_Prepayment	1318.94	1318.94	CC-BY		Unknown
Bristol	PMC6491500	30825692	10.1016/j.neurobiolaging.2019.01.025	Age-dependent changes in clock neuron structural plasticity and excitability are associated with a decrease in circadian output behaviour and sleep	Neurobiology of aging	FALSE	0197-4580, 1558-1497	1558-1497	2019-05-01T00:00:00Z	2019-02-02T00:00:00Z	Elsevier BV	not applicable	cc-by	cc-by	epmc_api	epmc_api	TRUE	FALSE	FALSE	FALSE	TRUE	FALSE	Added PMCID from EUPMC_x000D_ Confirmed fulltext is in EUPMC_x000D_ This article is not open access according to EUPMC, but since 6th March 2020 we take this to mean only that the publisher did not indicate to EUPMC that it can be included in their Open Access subset - it may well still be an OA article._x000D_ Added journal title from EUPMC_x000D_ Added issn from EUPMC_x000D_ Added eissn from EU…	43672	3396	EUR	3142.86		None	3142.86	0	CC-BY		Unknown
Bristol	PMC6395652	30820025	10.1038/s41398-019-0437-2	Leveraging brain cortex-derived molecular data to elucidate epigenetic and transcriptomic drivers of complex traits and disease	Translational psychiatry	TRUE	2158-3188	2158-3188	2019-02-01T00:00:00Z	2019-02-28T00:00:00Z	Springer Science and Business Media LLC	not applicable	cc-by	cc-by	epmc_api	epmc_api	TRUE	TRUE	FALSE	TRUE	TRUE	TRUE	Added PMCID from EUPMC_x000D_ Confirmed fulltext is in EUPMC_x000D_ Confirmed is open access from EUPMC_x000D_ Added journal title from EUPMC_x000D_ Added issn from EUPMC_x000D_ Added eissn from EUPMC_x000D_ Added grants data from EUPMC_x000D_ Added date of publication from EUPMC_x000D_ Added electronic publication date from EUPMC_x000D_ Checking if XML is available from EUPMC (since 6th March 20…	43546	3024	GBP	3024		None	1512	1512	CC-BY		Unknown
Bristol	PMC6466381	30813511	10.3390/v11030198	MultiBac: Baculovirus-mediated Multigene DNA Cargo Delivery in Insect and Mammalian Cells	Viruses	TRUE	1999-4915	1999-4915	2019-02-01T00:00:00Z	2019-02-26T00:00:00Z	MDPI AG	not applicable	cc-by	cc-by	epmc_api	epmc_api	TRUE	TRUE	FALSE	TRUE	TRUE	TRUE	Added PMCID from EUPMC_x000D_ Confirmed fulltext is in EUPMC_x000D_ Confirmed is open access from EUPMC_x000D_ Added journal title from EUPMC_x000D_ Added issn from EUPMC_x000D_ Added eissn from EUPMC_x000D_ Added grants data from EUPMC_x000D_ Added date of publication from EUPMC_x000D_ Added electronic publication date from EUPMC_x000D_ Checking if XML is available from EUPMC (since 6th March 20…	43536	1665.68	GBP	1665.68		None	832.84	832.84	CC-BY	BrisSynBio = a BBSRC/EPSRC Research Centre (BB/L01386X/1)	Unknown
Bristol	PMC6380210	30809194	10.3389/fendo.2019.00065	Systemic metabolism, its regulators and cancer: past mistakes and future potential	Frontiers in Endocrinology	TRUE	1664-2392	1664-2392	2019-01-01T00:00:00Z	2019-02-12T00:00:00Z	Frontiers Media SA	not applicable	cc-by	cc-by	epmc_api	epmc_api	TRUE	TRUE	FALSE	TRUE	TRUE	TRUE	Added PMCID from EUPMC_x000D_ Confirmed fulltext is in EUPMC_x000D_ Confirmed is open access from EUPMC_x000D_ Added journal title from EUPMC_x000D_ Added issn from EUPMC_x000D_ Added eissn from EUPMC_x000D_ Added grants data from EUPMC_x000D_ Added date of publication from EUPMC_x000D_ Added electronic publication date from EUPMC_x000D_ Checking if XML is available from EUPMC (since 6th March 20…	43497	2241	USD	2122.74		None	2122.74	0	CC-BY		Unknown
Bristol	PMC6390368	30808346	10.1186/s12913-019-3922-7	Socio-demographic patterns in hospital admissions and accident and emergency attendances among young people using linkage to NHS Hospital Episode Statistics: results from the Avon Longitudinal Study of Parents and Children	BMC health services research	TRUE	1472-6963	1472-6963	2019-02-01T00:00:00Z	2019-02-26T00:00:00Z	Springer Science and Business Media LLC	not applicable	cc-by	cc-by	epmc_api	epmc_api	TRUE	TRUE	FALSE	TRUE	TRUE	TRUE	Added PMCID from EUPMC_x000D_ Confirmed fulltext is in EUPMC_x000D_ Confirmed is open access from EUPMC_x000D_ Added journal title from EUPMC_x000D_ Added issn from EUPMC_x000D_ Added eissn from EUPMC_x000D_ Added grants data from EUPMC_x000D_ Added date of publication from EUPMC_x000D_ Added electronic publication date from EUPMC_x000D_ Checking if XML is available from EUPMC (since 6th March 20…	43522	1164.5	GBP	1164.5		Institutional_Prepayment	582.25	582.25	CC-BY		Unknown
Bristol	PMC6375836	30800088	10.3389/fpsyg.2019.00194	Maternal Prenatal External Locus of Control and Reduced Mathematical and Science Abilities in Their Offspring: A Longitudinal Birth Cohort Study	Frontiers in Psychology	TRUE	1664-1078	1664-1078	2019-01-01T00:00:00Z	2019-02-08T00:00:00Z	Frontiers Media SA	not applicable	cc-by	cc-by	epmc_api	epmc_api	TRUE	TRUE	FALSE	TRUE	TRUE	TRUE	Added PMCID from EUPMC_x000D_ Confirmed fulltext is in EUPMC_x000D_ Confirmed is open access from EUPMC_x000D_ Added journal title from EUPMC_x000D_ Added issn from EUPMC_x000D_ Added eissn from EUPMC_x000D_ Added grants data from EUPMC_x000D_ Added date of publication from EUPMC_x000D_ Added electronic publication date from EUPMC_x000D_ Checking if XML is available from EUPMC (since 6th March 20…	43500	2950	USD	2797.32		None	1398.66	1398.66	CC-BY		Unknown
Bristol	PMC6488395	30786093	10.1113/EP087304	Cardiac?specific overexpression of caveolin?3 preserves t?tubular ICa during heart failure in mice	Experimental physiology	FALSE	0958-0670, 1469-445X	1469-445X	2019-05-01T00:00:00Z	2019-03-14T00:00:00Z	Wiley	not applicable	cc-by	cc-by	epmc_api	epmc_api	TRUE	TRUE	FALSE	TRUE	TRUE	TRUE	Added PMCID from EUPMC_x000D_ Confirmed fulltext is in EUPMC_x000D_ Confirmed is open access from EUPMC_x000D_ Added journal title from EUPMC_x000D_ Added issn from EUPMC_x000D_ Added eissn from EUPMC_x000D_ Added grants data from EUPMC_x000D_ Added date of publication from EUPMC_x000D_ Added electronic publication date from EUPMC_x000D_ Checking if XML is available from EUPMC (since 6th March 20…	43539	1966.8	GBP	1966.8		None	1966.8	0	CC-BY		Unknown
Bristol	PMC6581114	30772818	10.1136/oemed-2018-105181	Lifetime exposure to rubber dusts, fumes and n-Nitrosamines and cancer mortality in a cohort of British rubber workers with 49 years follow-up	Occupational and environmental medicine	FALSE	1351-0711, 1470-7926	1470-7926	2019-04-01T00:00:00Z	2019-02-16T00:00:00Z	BMJ Publishing Group	not applicable	cc-by	cc-by	epmc_api	epmc_api	TRUE	TRUE	FALSE	TRUE	TRUE	TRUE	Added PMCID from EUPMC_x000D_ Confirmed fulltext is in EUPMC_x000D_ Confirmed is open access from EUPMC_x000D_ Added journal title from EUPMC_x000D_ Added issn from EUPMC_x000D_ Added eissn from EUPMC_x000D_ Added grants data from EUPMC_x000D_ Added date of publication from EUPMC_x000D_ Added electronic publication date from EUPMC_x000D_ Checking if XML is available from EUPMC (since 6th March 20…	43482	2340	GBP	2340		Institutional_ membership discount	2340	0	CC-BY		Unknown
Bristol	PMC6581116	30772817	10.1136/oemed-2018-105182	A Job-Exposure Matrix for Historical Exposures to Rubber Dust, Rubber Fumes, and n-Nitrosamines in the British Rubber Industry	Occupational and environmental medicine	FALSE	1351-0711, 1470-7926	1470-7926	2019-04-01T00:00:00Z	2019-02-16T00:00:00Z	BMJ	not applicable	cc-by	cc-by	epmc_api	epmc_api	TRUE	TRUE	FALSE	TRUE	TRUE	TRUE	Added PMCID from EUPMC_x000D_ Confirmed fulltext is in EUPMC_x000D_ Confirmed is open access from EUPMC_x000D_ Added journal title from EUPMC_x000D_ Added issn from EUPMC_x000D_ Added eissn from EUPMC_x000D_ Added grants data from EUPMC_x000D_ Added date of publication from EUPMC_x000D_ Added electronic publication date from EUPMC_x000D_ Checking if XML is available from EUPMC (since 6th March 20…	43482	2340	GBP	2340		Institutional_ membership discount	2340	0	CC-BY		Unknown
Bristol	PMC6520240	30761972	10.1017/S1368980018004111	Acceptability, internal consistency and test-retest reliability of scales to assess parental and nursery staffÂ’s self-efficacy, motivation and knowledge in relation to preschoolersÂ’ nutrition, oral health and physical activity	Public health nutrition	FALSE	1368-9800, 1475-2727	1475-2727	2019-04-01T00:00:00Z	2019-02-14T00:00:00Z	Cambridge University Press (CUP)	not applicable	cc-by	cc-by	epmc_api	epmc_api	TRUE	TRUE	FALSE	TRUE	TRUE	TRUE	Added PMCID from EUPMC_x000D_ Confirmed fulltext is in EUPMC_x000D_ Confirmed is open access from EUPMC_x000D_ Added journal title from EUPMC_x000D_ Added issn from EUPMC_x000D_ Added eissn from EUPMC_x000D_ Added grants data from EUPMC_x000D_ Added date of publication from EUPMC_x000D_ Added electronic publication date from EUPMC_x000D_ Checking if XML is available from EUPMC (since 6th March 20…	43480	2244	GBP	2244		None	1122	1122	CC-BY	Joint funding (MR/KO232331/1) from the BHF, CRUK, ESRC, MRC, the Welsh Government and the Wellcome Trust, under the auspices of the UK Clinical Research Collaboration)	Unknown
Bristol	PMC6371501	30755270	10.1186/s13643-018-0908-1	Does testosterone mediate the relationship between vitamin D and prostate cancer? A systematic review and meta-analysis protocol	Systematic reviews	TRUE	2046-4053	2046-4053	2019-02-01T00:00:00Z	2019-02-12T00:00:00Z	Springer Science and Business Media LLC	not applicable	cc-by	cc-by	epmc_api	epmc_api	TRUE	TRUE	FALSE	TRUE	TRUE	TRUE	Added PMCID from EUPMC_x000D_ Confirmed fulltext is in EUPMC_x000D_ Confirmed is open access from EUPMC_x000D_ Added journal title from EUPMC_x000D_ Added issn from EUPMC_x000D_ Added eissn from EUPMC_x000D_ Added grants data from EUPMC_x000D_ Added date of publication from EUPMC_x000D_ Added electronic publication date from EUPMC_x000D_ Checking if XML is available from EUPMC (since 6th March 20…	43441	1878	GBP	1878		None	1878	0	CC-BY		Unknown
Bristol	PMC6365529	30728366	10.1038/s41598-018-37012-9	Critical roles for the phosphatidylinositide 3-kinase isoforms p110? and p110? in thrombopoietin-mediated priming of platelet function	Scientific reports	TRUE	2045-2322	2045-2322	2019-02-01T00:00:00Z	2019-02-06T00:00:00Z	Springer Science and Business Media LLC	not applicable	cc-by	cc-by	epmc_api	epmc_api	TRUE	TRUE	FALSE	TRUE	TRUE	TRUE	Added PMCID from EUPMC_x000D_ Confirmed fulltext is in EUPMC_x000D_ Confirmed is open access from EUPMC_x000D_ Added journal title from EUPMC_x000D_ Added issn from EUPMC_x000D_ Added eissn from EUPMC_x000D_ Added grants data from EUPMC_x000D_ Added date of publication from EUPMC_x000D_ Added electronic publication date from EUPMC_x000D_ Checking if XML is available from EUPMC (since 6th March 20…	43489	1677.6	GBP	1677.6		None	1677.6	0	CC-BY		Unknown
Bristol	PMC6357493	30704525	10.1186/s40246-018-0190-2	A genome-wide association study of mitochondrial DNA copy number in two population-based cohort	Human genomics	TRUE	1473-9542, 1479-7364	1479-7364	2019-01-01T00:00:00Z	2019-01-31T00:00:00Z	Springer Science and Business Media LLC	not applicable	cc-by	cc-by	epmc_api	epmc_api	TRUE	TRUE	FALSE	TRUE	TRUE	TRUE	Added PMCID from EUPMC_x000D_ Confirmed fulltext is in EUPMC_x000D_ Confirmed is open access from EUPMC_x000D_ Added journal title from EUPMC_x000D_ Added issn from EUPMC_x000D_ Added eissn from EUPMC_x000D_ Added grants data from EUPMC_x000D_ Added date of publication from EUPMC_x000D_ Added electronic publication date from EUPMC_x000D_ Checking if XML is available from EUPMC (since 6th March 20…	43467	1330.25	GBP	1330.25		Institutional_Prepayment	665.13	665.13	CC-BY		Unknown
Bristol	PMC6354354	30704512	10.1186/s13073-019-0613-2	Prioritizing putative influential genes in cardiovascular disease susceptibility by applying tissue-specific Mendelian randomization	Genome medicine	TRUE	1756-994X	1756-994X	2019-01-01T00:00:00Z	2019-01-31T00:00:00Z	Springer Science and Business Media LLC	not applicable	cc-by	cc-by	epmc_api	epmc_api	TRUE	TRUE	FALSE	TRUE	TRUE	TRUE	Added PMCID from EUPMC_x000D_ Confirmed fulltext is in EUPMC_x000D_ Confirmed is open access from EUPMC_x000D_ Added journal title from EUPMC_x000D_ Added issn from EUPMC_x000D_ Added eissn from EUPMC_x000D_ Added grants data from EUPMC_x000D_ Added date of publication from EUPMC_x000D_ Added electronic publication date from EUPMC_x000D_ Checking if XML is available from EUPMC (since 6th March 20…	43558	1513	GBP	1513		Institutional_Prepayment	756.5	756.5	CC-BY		Unknown
Bristol	PMC6341110	30664637	10.1038/s41467-018-07863-x	Low-frequency variation in TP53 has large effects on head circumference and intracranial volume	Nature communications	TRUE	2041-1723	2041-1723	2019-01-01T00:00:00Z	2019-01-21T00:00:00Z	Springer Science and Business Media LLC	not applicable	cc-by	cc-by	epmc_api	epmc_api	TRUE	TRUE	FALSE	TRUE	TRUE	TRUE	Added PMCID from EUPMC_x000D_ Confirmed fulltext is in EUPMC_x000D_ Confirmed is open access from EUPMC_x000D_ Added journal title from EUPMC_x000D_ Added issn from EUPMC_x000D_ Added eissn from EUPMC_x000D_ Added grants data from EUPMC_x000D_ Added date of publication from EUPMC_x000D_ Added electronic publication date from EUPMC_x000D_ Checking if XML is available from EUPMC (since 6th March 20…	43490	3960	GBP	3960		None	1980	1980	CC-BY		Unknown
Bristol	PMC6370945	30661800	10.1016/j.cub.2018.12.027	Retromer controls planar polarity protein levels and asymmetric localisation at intercellular junctions	Current biology : CB	FALSE	0960-9822, 1879-0445	1879-0445	2019-02-01T00:00:00Z	2019-01-17T00:00:00Z	Elsevier BV	not applicable	cc-by	cc-by	epmc_api	epmc_api	TRUE	TRUE	FALSE	TRUE	TRUE	TRUE	Added PMCID from EUPMC_x000D_ Confirmed fulltext is in EUPMC_x000D_ Confirmed is open access from EUPMC_x000D_ Added journal title from EUPMC_x000D_ Added issn from EUPMC_x000D_ Added eissn from EUPMC_x000D_ Added grants data from EUPMC_x000D_ Added date of publication from EUPMC_x000D_ Added electronic publication date from EUPMC_x000D_ Checking if XML is available from EUPMC (since 6th March 20…	43507	4480	EUR	4868.88		None	4868.88	0	CC-BY		Unknown
Bristol	PMC6338768	30659178	10.1038/s41467-018-08219-1	Apparent latent structure within the UK Biobank sample has implications for epidemiological analysis	Nature communications	TRUE	2041-1723	2041-1723	2019-01-01T00:00:00Z	2019-01-18T00:00:00Z	Springer Science and Business Media LLC	not applicable	cc-by	cc-by	epmc_api	epmc_api	TRUE	TRUE	FALSE	TRUE	TRUE	TRUE	Added PMCID from EUPMC_x000D_ Confirmed fulltext is in EUPMC_x000D_ Confirmed is open access from EUPMC_x000D_ Added journal title from EUPMC_x000D_ Added issn from EUPMC_x000D_ Added eissn from EUPMC_x000D_ Added grants data from EUPMC_x000D_ Added date of publication from EUPMC_x000D_ Added electronic publication date from EUPMC_x000D_ Checking if XML is available from EUPMC (since 6th March 20…	43453	3960	GBP	3960		None	1980	1980	CC-BY	Full funder list: MRC/Wellcome, ESRC, CRUK	Unknown
Bristol	PMC6332866	30646952	10.1186/s12888-018-2000-8	Are left-behind families of migrant workers at increased risk of attempted suicide? Â– A cohort study of 178,000+ individuals in Sri Lanka	BMC psychiatry	TRUE	1471-244X	1471-244X	2019-01-01T00:00:00Z	2019-01-15T00:00:00Z	Springer Science and Business Media LLC	not applicable	cc-by	cc-by	epmc_api	epmc_api	TRUE	TRUE	FALSE	TRUE	TRUE	TRUE	Added PMCID from EUPMC_x000D_ Confirmed fulltext is in EUPMC_x000D_ Confirmed is open access from EUPMC_x000D_ Added journal title from EUPMC_x000D_ Added issn from EUPMC_x000D_ Added eissn from EUPMC_x000D_ Added grants data from EUPMC_x000D_ Added date of publication from EUPMC_x000D_ Added electronic publication date from EUPMC_x000D_ Checking if XML is available from EUPMC (since 6th March 20…	43537	1704	GBP	1704		None	852	852	CC-BY		Unknown
Bristol	PMC6701825	30640473	10.1021/acs.jmedchem.8b01402	Anti-proliferative and anti-migratory effects of a novel YAP-TEAD interaction inhibitor identified using in silico molecular docking	Journal of medicinal chemistry	FALSE	0022-2623, 1520-4804	1520-4804	2019-02-01T00:00:00Z	2019-01-31T00:00:00Z	American Chemical Society (ACS)	not applicable	cc-by	cc-by	epmc_xml_permissions	epmc_xml_permissions	TRUE	TRUE	FALSE	TRUE	TRUE	TRUE	Added PMCID from EUPMC_x000D_ Confirmed fulltext is in EUPMC_x000D_ Confirmed is open access from EUPMC_x000D_ Added journal title from EUPMC_x000D_ Added issn from EUPMC_x000D_ Added eissn from EUPMC_x000D_ Added grants data from EUPMC_x000D_ Added date of publication from EUPMC_x000D_ Added electronic publication date from EUPMC_x000D_ Checking if XML is available from EUPMC (since 6th March 20…	43483	5000	USD	4805.03		None	4805.03	0	CC-BY		Unknown
Bristol	PMC6334975	30608922	10.1371/journal.pcbi.1006267	Locus Coeruleus tracking of prediction errors optimises cognitive flexibility: An Active Inference model	PLoS computational biology	TRUE	1553-734X, 1553-7358	1553-7358	2019-01-01T00:00:00Z	2019-01-04T00:00:00Z	Public Library of Science (PLoS)	not applicable	cc-by	cc-by	epmc_api	epmc_api	TRUE	TRUE	FALSE	TRUE	TRUE	TRUE	Added PMCID from EUPMC_x000D_ Confirmed fulltext is in EUPMC_x000D_ Confirmed is open access from EUPMC_x000D_ Added journal title from EUPMC_x000D_ Added issn from EUPMC_x000D_ Added eissn from EUPMC_x000D_ Added grants data from EUPMC_x000D_ Added date of publication from EUPMC_x000D_ Added electronic publication date from EUPMC_x000D_ Checking if XML is available from EUPMC (since 6th March 20…	43524	2350	USD	2118.49		None	2118.49	0	CC-BY		Unknown
Bristol	PMC6344080	30601117	10.7554/eLife.42129	Human CtIP forms a tetrameric dumbbell-shaped particle which binds and bridges complex DNA end structures for double-strand break repair	eLife	TRUE	2050-084X	2050-084X	2019-01-01T00:00:00Z	2019-01-02T00:00:00Z	eLife Sciences Publications, Ltd	not applicable	cc-by	cc-by	epmc_api	epmc_api	TRUE	TRUE	FALSE	TRUE	TRUE	TRUE	Added PMCID from EUPMC_x000D_ Confirmed fulltext is in EUPMC_x000D_ Confirmed is open access from EUPMC_x000D_ Added journal title from EUPMC_x000D_ Added issn from EUPMC_x000D_ Added eissn from EUPMC_x000D_ Added grants data from EUPMC_x000D_ Added date of publication from EUPMC_x000D_ Added electronic publication date from EUPMC_x000D_ Checking if XML is available from EUPMC (since 6th March 20…	43482	3000	USD	2888.41		None	2888.41	0	CC-BY		Unknown
Bristol	PMC6335059	30601115	10.7554/eLife.41803	ATP-induced asymmetric pre-protein folding as a driver of protein translocation through the Sec machinery	eLife	TRUE	2050-084X	2050-084X	2019-01-01T00:00:00Z	2019-01-02T00:00:00Z	eLife Sciences Publications, Ltd	not applicable	cc-by	cc-by	epmc_api	epmc_api	TRUE	TRUE	FALSE	TRUE	TRUE	TRUE	Added PMCID from EUPMC_x000D_ Confirmed fulltext is in EUPMC_x000D_ Confirmed is open access from EUPMC_x000D_ Added journal title from EUPMC_x000D_ Added issn from EUPMC_x000D_ Added eissn from EUPMC_x000D_ Added grants data from EUPMC_x000D_ Added date of publication from EUPMC_x000D_ Added electronic publication date from EUPMC_x000D_ Checking if XML is available from EUPMC (since 6th March 20…	43479	3000	USD	2891.8		None	2891.8	0	CC-BY		Unknown
Bristol	PMC6294841	30581244	10.1016/j.childyouth.2018.10.028	Examining the wider context of formal youth mentoring programme development, delivery and maintenance: A qualitative study with mentoring managers and experts in the United Kingdom	Children and youth services review	FALSE	0190-7409	Unknown	2018-12-01T00:00:00Z	Unknown	Elsevier BV	not applicable	cc-by	cc-by	epmc_api	epmc_api	TRUE	TRUE	FALSE	TRUE	TRUE	TRUE	Added PMCID from EUPMC_x000D_ Confirmed fulltext is in EUPMC_x000D_ Confirmed is open access from EUPMC_x000D_ Added journal title from EUPMC_x000D_ Added issn from EUPMC_x000D_ Added grants data from EUPMC_x000D_ Added date of publication from EUPMC_x000D_ Checking if XML is available from EUPMC (since 6th March 2020 this is always done for any article we have a PMCID for, regardless of other EU…	43392	1400	USD	976.74		Elsevier_Prepayment	488.37	488.37	CC-BY	Joint funding (MR/KO232331/1) from the BHF, CRUK, ESRC, MRC, the Welsh Government and the Wellcome Trust, under the auspices of the UK Clinical Research Collaboration)	Unknown
Bristol	PMC6453814	30573357	10.1016/j.vaccine.2018.12.007	Barriers and enablers to adolescent self-consent for vaccination: A mixed-methods evidence synthesis	Vaccine	FALSE	0264-410X, 1873-2518	1873-2518	2019-01-01T00:00:00Z	2018-12-17T00:00:00Z	Elsevier BV	not applicable	cc-by	cc-by	epmc_api	epmc_api	TRUE	TRUE	FALSE	TRUE	TRUE	TRUE	Added PMCID from EUPMC_x000D_ Confirmed fulltext is in EUPMC_x000D_ Confirmed is open access from EUPMC_x000D_ Added journal title from EUPMC_x000D_ Added issn from EUPMC_x000D_ Added eissn from EUPMC_x000D_ Added grants data from EUPMC_x000D_ Added date of publication from EUPMC_x000D_ Added electronic publication date from EUPMC_x000D_ Checking if XML is available from EUPMC (since 6th March 20…	43455	2532	EUR	2823.72		None	1411.86	1411.86	CC-BY	MRC & COAF funded - Author: "we have to acknowledge BHF, CRUK, ESRC, MRC, the Welsh Government and the Wellcome Trust in publications"	Unknown
Bristol	PMC6452214	30561638	10.1093/hmg/ddy434	The effect of body mass index on smoking behaviour and nicotine metabolism: a Mendelian randomization study	Human molecular genetics	FALSE	0964-6906, 1460-2083	1460-2083	2019-04-01T00:00:00Z	Unknown	Oxford University Press (OUP)	not applicable	cc-by	cc-by	epmc_api	epmc_api	TRUE	TRUE	FALSE	TRUE	TRUE	TRUE	Added PMCID from EUPMC_x000D_ Confirmed fulltext is in EUPMC_x000D_ Confirmed is open access from EUPMC_x000D_ Added journal title from EUPMC_x000D_ Added issn from EUPMC_x000D_ Added eissn from EUPMC_x000D_ Added grants data from EUPMC_x000D_ Added date of publication from EUPMC_x000D_ Checking if XML is available from EUPMC (since 6th March 2020 this is always done for any article we have a PMC…	43455	2109	GBP	2109		Institutional_Prepayment	1054.5	1054.5	CC-BY		Unknown
Bristol	PMC6331743	30552442	10.1007/s00198-018-4795-z	Lean mass and lower limb muscle function in relation to hip strength, geometry and fracture risk indices in community-dwelling older women	Osteoporosis international : a journal established as result of cooperation between the European Foundation for Osteoporosis and the National Osteoporosis Foundation of the USA	FALSE	0937-941X, 1433-2965	1433-2965	2019-01-01T00:00:00Z	2018-12-14T00:00:00Z	Springer Science and Business Media LLC	cc-by-nc	cc-by-nc	cc-by-nc	publisher_splash_page	epmc_api	TRUE	TRUE	FALSE	TRUE	FALSE	FALSE	Added PMCID from EUPMC_x000D_ Confirmed fulltext is in EUPMC_x000D_ Confirmed is open access from EUPMC_x000D_ Added journal title from EUPMC_x000D_ Added issn from EUPMC_x000D_ Added eissn from EUPMC_x000D_ Added grants data from EUPMC_x000D_ Added date of publication from EUPMC_x000D_ Added electronic publication date from EUPMC_x000D_ Checking if XML is available from EUPMC (since 6th March 20…	43497	2640	EUR	2357.15		None	2357.15	0	CC-BY-NC	Publisher chased regarding incorrect licence - 06/11/2019	Unknown
Bristol	PMC6295101	30547757	10.1186/s12863-018-0703-y	Associations of sex hormone-binding globulin and testosterone with genome-wide DNA methylation	BMC genetics	TRUE	1471-2156	1471-2156	2018-12-01T00:00:00Z	2018-12-14T00:00:00Z	Springer Science and Business Media LLC	not applicable	cc-by	cc-by	epmc_api	epmc_api	TRUE	TRUE	FALSE	TRUE	TRUE	TRUE	Added PMCID from EUPMC_x000D_ Confirmed fulltext is in EUPMC_x000D_ Confirmed is open access from EUPMC_x000D_ Added journal title from EUPMC_x000D_ Added issn from EUPMC_x000D_ Added eissn from EUPMC_x000D_ Added grants data from EUPMC_x000D_ Added date of publication from EUPMC_x000D_ Added electronic publication date from EUPMC_x000D_ Checking if XML is available from EUPMC (since 6th March 20…	43433	1704	GBP	1704		None	852	852	CC-BY	Full funder list: MRC, ESRC, BBSRC (BB/I025751/1 and BB/I025263/1), Wellcome/ALSPAC	Unknown
Bristol	PMC6358125	30526940	10.1016/S2542-5196(18)30240-7	Implications for workability and survivability in populations exposed to extreme heat under climate change: a modelling study	The Lancet. Planetary health	TRUE	2542-5196	2542-5196	2018-12-01T00:00:00Z	Unknown	Elsevier BV	not applicable	cc-by	cc-by	epmc_api	epmc_api	TRUE	TRUE	FALSE	TRUE	TRUE	TRUE	Added PMCID from EUPMC_x000D_ Confirmed fulltext is in EUPMC_x000D_ Confirmed is open access from EUPMC_x000D_ Added journal title from EUPMC_x000D_ Added issn from EUPMC_x000D_ Added eissn from EUPMC_x000D_ Added grants data from EUPMC_x000D_ Added date of publication from EUPMC_x000D_ Checking if XML is available from EUPMC (since 6th March 2020 this is always done for any article we have a PMC…	43510	5302	EUR	4651.17		None	4651.17	0	CC-BY		Unknown
Bristol	PMC6250296	30524135	10.1161/CIRCULATIONAHA.117.033278	Assessing the Causal Role of Body Mass Index on Cardiovascular Health in Young Adults Mendelian Randomization and Recall-by-Genotype Analyses	Circulation	FALSE	0009-7322, 1524-4539	1524-4539	2018-11-01T00:00:00Z	2018-07-30T00:00:00Z	Ovid Technologies (Wolters Kluwer Health)	not applicable	cc-by	cc-by	epmc_api	epmc_api	TRUE	FALSE	FALSE	FALSE	TRUE	FALSE	Added PMCID from EUPMC_x000D_ Confirmed fulltext is in EUPMC_x000D_ This article is not open access according to EUPMC, but since 6th March 2020 we take this to mean only that the publisher did not indicate to EUPMC that it can be included in their Open Access subset - it may well still be an OA article._x000D_ Added journal title from EUPMC_x000D_ Added issn from EUPMC_x000D_ Added eissn from EU…	43497	4700	USD	4360.96		None	2180.48	2180.48	CC-BY		Unknown
Bristol	PMC6277431	30510187	10.1038/s41398-018-0307-3	Childhood adversity and DNA methylation in two population-based cohorts	Translational psychiatry	TRUE	2158-3188	2158-3188	2018-12-01T00:00:00Z	2018-12-03T00:00:00Z	Springer Science and Business Media LLC	not applicable	cc-by	cc-by	epmc_api	epmc_api	TRUE	TRUE	FALSE	TRUE	TRUE	TRUE	Added PMCID from EUPMC_x000D_ Confirmed fulltext is in EUPMC_x000D_ Confirmed is open access from EUPMC_x000D_ Added journal title from EUPMC_x000D_ Added issn from EUPMC_x000D_ Added eissn from EUPMC_x000D_ Added grants data from EUPMC_x000D_ Added date of publication from EUPMC_x000D_ Added electronic publication date from EUPMC_x000D_ Checking if XML is available from EUPMC (since 6th March 20…	43490	3024	GBP	3024		None	1512	1512	CC-BY		Unknown
Bristol	PMC6344226	30503408	10.1016/j.ypmed.2018.10.013	Screening prevalence of fetal alcohol spectrum disorders in a region of the United Kingdom: a population-based birth-cohort study	Preventive medicine	FALSE	0091-7435, 1096-0260	1096-0260	2019-01-01T00:00:00Z	2018-11-30T00:00:00Z	Elsevier BV	not applicable	cc-by	cc-by	epmc_api	epmc_api	TRUE	TRUE	FALSE	TRUE	TRUE	TRUE	Added PMCID from EUPMC_x000D_ Confirmed fulltext is in EUPMC_x000D_ Confirmed is open access from EUPMC_x000D_ Added journal title from EUPMC_x000D_ Added issn from EUPMC_x000D_ Added eissn from EUPMC_x000D_ Added grants data from EUPMC_x000D_ Added date of publication from EUPMC_x000D_ Added electronic publication date from EUPMC_x000D_ Checking if XML is available from EUPMC (since 6th March 20…	43404	2283.16	GBP	2283.16		Elsevier_Prepayment	1141.58	1141.58	CC-BY		Unknown
Bristol	PMC6265272	30498225	10.1038/s41398-018-0313-5	Maternal smoking during pregnancy and autism: using causal inference methods in a birth cohort study	Translational psychiatry	TRUE	2158-3188	2158-3188	2018-11-01T00:00:00Z	2018-11-29T00:00:00Z	Springer Science and Business Media LLC	not applicable	cc-by	cc-by	epmc_api	epmc_api	TRUE	TRUE	FALSE	TRUE	TRUE	TRUE	Added PMCID from EUPMC_x000D_ Confirmed fulltext is in EUPMC_x000D_ Confirmed is open access from EUPMC_x000D_ Added journal title from EUPMC_x000D_ Added issn from EUPMC_x000D_ Added eissn from EUPMC_x000D_ Added grants data from EUPMC_x000D_ Added date of publication from EUPMC_x000D_ Added electronic publication date from EUPMC_x000D_ Checking if XML is available from EUPMC (since 6th March 20…	43489	3024	GBP	3024		None	1512	1512	CC-BY		Unknown
Bristol	PMC6232890	30459635	10.3389/fphys.2018.01488	Blockade of rostral ventrolateral medulla apelin receptors does not attenuate arterial pressure in SHR and L-NAME-induced hypertensive rats	Frontiers in physiology	TRUE	1664-042X	1664-042X	2018-01-01T00:00:00Z	2018-10-24T00:00:00Z	Frontiers Media SA	not applicable	cc-by	cc-by	epmc_api	epmc_api	TRUE	TRUE	FALSE	TRUE	TRUE	TRUE	Added PMCID from EUPMC_x000D_ Confirmed fulltext is in EUPMC_x000D_ Confirmed is open access from EUPMC_x000D_ Added journal title from EUPMC_x000D_ Added issn from EUPMC_x000D_ Added eissn from EUPMC_x000D_ Added grants data from EUPMC_x000D_ Added date of publication from EUPMC_x000D_ Added electronic publication date from EUPMC_x000D_ Checking if XML is available from EUPMC (since 6th March 20…	43375	2950	USD	2816.57		None	2816.57	0	CC-BY		Unknown
Bristol	PMC6236905	30428858	10.1186/s12889-018-6138-6	Association of diet in nurseries and physical activity with zBMI in 2-4-year olds in England: a cross-sectional study	BMC public health	TRUE	1471-2458	1471-2458	2018-11-01T00:00:00Z	2018-11-14T00:00:00Z	Springer Science and Business Media LLC	not applicable	cc-by	cc-by	epmc_api	epmc_api	TRUE	TRUE	FALSE	TRUE	TRUE	TRUE	Added PMCID from EUPMC_x000D_ Confirmed fulltext is in EUPMC_x000D_ Confirmed is open access from EUPMC_x000D_ Added journal title from EUPMC_x000D_ Added issn from EUPMC_x000D_ Added eissn from EUPMC_x000D_ Added grants data from EUPMC_x000D_ Added date of publication from EUPMC_x000D_ Added electronic publication date from EUPMC_x000D_ Checking if XML is available from EUPMC (since 6th March 20…	43537	1164.5	GBP	1164.5		Institutional_Prepayment	582.25	582.25	CC-BY	Joint funding (MR/KO232331/1) from the BHF, CRUK, ESRC, MRC, the Welsh Government and the Wellcome Trust, under the auspices of the UK Clinical Research Collaboration)	Unknown
Bristol	PMC6265795	30428634	10.3390/ijerph15112547	Â“In my dayÂ…Â” Â– a qualitative exploration of parentsÂ’ views on childrenÂ’s physical activity and screen viewing in relation to their own childhood	International journal of environmental research and public health	TRUE	1661-7827, 1660-4601	1660-4601	2018-11-01T00:00:00Z	2018-11-13T00:00:00Z	MDPI AG	not applicable	cc-by	cc-by	epmc_api	epmc_api	TRUE	TRUE	FALSE	TRUE	TRUE	TRUE	Added PMCID from EUPMC_x000D_ Confirmed fulltext is in EUPMC_x000D_ Confirmed is open access from EUPMC_x000D_ Added journal title from EUPMC_x000D_ Added issn from EUPMC_x000D_ Added eissn from EUPMC_x000D_ Added grants data from EUPMC_x000D_ Added date of publication from EUPMC_x000D_ Added electronic publication date from EUPMC_x000D_ Checking if XML is available from EUPMC (since 6th March 20…	43420	1327	GBP	1327		None	1327	0	CC-BY		Unknown
Bristol	PMC6587492	30417430	10.1111/apa.14640	Major concerns about late hypothermia study	Acta paediatrica (Oslo, Norway : 1992)	FALSE	0803-5253, 1651-2227	1651-2227	2019-04-01T00:00:00Z	2018-11-28T00:00:00Z	Wiley	not applicable	cc-by	cc-by	epmc_api	epmc_api	TRUE	TRUE	FALSE	TRUE	TRUE	TRUE	Added PMCID from EUPMC_x000D_ Confirmed fulltext is in EUPMC_x000D_ Confirmed is open access from EUPMC_x000D_ Added journal title from EUPMC_x000D_ Added issn from EUPMC_x000D_ Added eissn from EUPMC_x000D_ Added date of publication from EUPMC_x000D_ Added electronic publication date from EUPMC_x000D_ Checking if XML is available from EUPMC (since 6th March 2020 this is always done for any artic…	43445	1800	GBP	1800		Institutional_Prepayment	900	900	CC-BY		Unknown
Bristol	PMC6221892	30405117	10.1038/s41398-018-0286-4	Maternal depression during pregnancy and cord blood DNA methylation	Translational psychiatry	TRUE	2158-3188	2158-3188	2018-11-01T00:00:00Z	2018-11-07T00:00:00Z	Springer Science and Business Media LLC	not applicable	cc-by	cc-by	epmc_api	epmc_api	TRUE	TRUE	FALSE	TRUE	TRUE	TRUE	Added PMCID from EUPMC_x000D_ Confirmed fulltext is in EUPMC_x000D_ Confirmed is open access from EUPMC_x000D_ Added journal title from EUPMC_x000D_ Added issn from EUPMC_x000D_ Added eissn from EUPMC_x000D_ Added grants data from EUPMC_x000D_ Added date of publication from EUPMC_x000D_ Added electronic publication date from EUPMC_x000D_ Checking if XML is available from EUPMC (since 6th March 20…	43398	3024	GBP	3024		None	1512	1512	CC-BY		Unknown
Bristol	PMC6219043	30396349	10.1186/s12916-018-1191-7	Gestational diabetes and ultrasound assessed fetal growth in South Asian and White European women: findings from a prospective pregnancy cohort	BMC medicine	TRUE	1741-7015	1741-7015	2018-11-01T00:00:00Z	2018-11-06T00:00:00Z	Springer Science and Business Media LLC	not applicable	cc-by	cc-by	epmc_api	epmc_api	TRUE	TRUE	FALSE	TRUE	TRUE	TRUE	Added PMCID from EUPMC_x000D_ Confirmed fulltext is in EUPMC_x000D_ Confirmed is open access from EUPMC_x000D_ Added journal title from EUPMC_x000D_ Added issn from EUPMC_x000D_ Added eissn from EUPMC_x000D_ Added grants data from EUPMC_x000D_ Added date of publication from EUPMC_x000D_ Added electronic publication date from EUPMC_x000D_ Checking if XML is available from EUPMC (since 6th March 20…	43711	1513	GBP	1513		Institutional_Prepayment	378.25	756.5	CC-BY	25% charged to BHF directly, 50% UKRI, 25% COAF	Unknown
Bristol	PMC6350005	30391394	10.1016/j.joca.2018.09.016	Models of Osteoarthritis: the good, the bad and the promising	Osteoarthritis and cartilage	FALSE	1063-4584, 1522-9653	1522-9653	2019-02-01T00:00:00Z	2018-10-25T00:00:00Z	Elsevier BV	not applicable	cc-by	cc-by	epmc_api	epmc_api	TRUE	TRUE	FALSE	TRUE	TRUE	TRUE	Added PMCID from EUPMC_x000D_ Confirmed fulltext is in EUPMC_x000D_ Confirmed is open access from EUPMC_x000D_ Added journal title from EUPMC_x000D_ Added issn from EUPMC_x000D_ Added eissn from EUPMC_x000D_ Added grants data from EUPMC_x000D_ Added date of publication from EUPMC_x000D_ Added electronic publication date from EUPMC_x000D_ Checking if XML is available from EUPMC (since 6th March 20…	43440	2676	EUR	2480.71		None	2480.71	0	CC-BY		Unknown
Bristol	PMC6445803	30389614	10.1016/j.vph.2018.10.010	Elucidating the contributory role of microRNA to cardiovascular diseases (a review)	Vascular pharmacology	FALSE	1537-1891, 1879-3649	1879-3649	2019-03-01T00:00:00Z	2018-10-31T00:00:00Z	Elsevier BV	not applicable	cc-by	cc-by	epmc_api	epmc_api	TRUE	TRUE	FALSE	TRUE	TRUE	TRUE	Added PMCID from EUPMC_x000D_ Confirmed fulltext is in EUPMC_x000D_ Confirmed is open access from EUPMC_x000D_ Added journal title from EUPMC_x000D_ Added issn from EUPMC_x000D_ Added eissn from EUPMC_x000D_ Added grants data from EUPMC_x000D_ Added date of publication from EUPMC_x000D_ Added electronic publication date from EUPMC_x000D_ Checking if XML is available from EUPMC (since 6th March 20…	43445	2590	EUR	2902.87		None	2902.87	0	CC-BY		Unknown
Bristol	PMC6271324	30378177	10.1111/jvim.15325	Development of an estimated glomerular filtration rate (eGFR) formula in cats	Journal of veterinary internal medicine	TRUE	0891-6640, 1939-1676	1939-1676	2018-11-01T00:00:00Z	2018-10-30T00:00:00Z	Wiley	not applicable	cc-by	cc-by	epmc_api	epmc_api	TRUE	TRUE	FALSE	TRUE	TRUE	TRUE	Added PMCID from EUPMC_x000D_ Confirmed fulltext is in EUPMC_x000D_ Confirmed is open access from EUPMC_x000D_ Added journal title from EUPMC_x000D_ Added issn from EUPMC_x000D_ Added eissn from EUPMC_x000D_ Added grants data from EUPMC_x000D_ Added date of publication from EUPMC_x000D_ Added electronic publication date from EUPMC_x000D_ Checking if XML is available from EUPMC (since 6th March 20…	43440	1311.6	GBP	1311.6		None	1311.6	0	CC-BY		Unknown
Bristol	PMC6203963	30367655	10.1186/s13019-018-0791-9	Case report and management approach in idiopathic pulmonary arteries aneurysm	Journal of cardiothoracic surgery	TRUE	1749-8090	1749-8090	2018-10-01T00:00:00Z	2018-10-26T00:00:00Z	Springer Science and Business Media LLC	not applicable	cc-by	cc-by	epmc_api	epmc_api	TRUE	TRUE	FALSE	TRUE	TRUE	TRUE	Added PMCID from EUPMC_x000D_ Confirmed fulltext is in EUPMC_x000D_ Confirmed is open access from EUPMC_x000D_ Added journal title from EUPMC_x000D_ Added issn from EUPMC_x000D_ Added eissn from EUPMC_x000D_ Added grants data from EUPMC_x000D_ Added date of publication from EUPMC_x000D_ Added electronic publication date from EUPMC_x000D_ Checking if XML is available from EUPMC (since 6th March 20…	43440	1728	GBP	1728		None	1728	0	CC-BY		Unknown
Bristol	PMC6406208	30365369	10.1080/09537104.2018.1535703	Small GTPases in platelet membrane trafficking	Platelets	FALSE	0953-7104, 1369-1635	1369-1635	2019-01-01T00:00:00Z	2018-10-26T00:00:00Z	Informa UK Limited	not applicable	cc-by	cc-by	epmc_api	epmc_api	TRUE	TRUE	FALSE	TRUE	TRUE	TRUE	Added PMCID from EUPMC_x000D_ Confirmed fulltext is in EUPMC_x000D_ Confirmed is open access from EUPMC_x000D_ Added journal title from EUPMC_x000D_ Added issn from EUPMC_x000D_ Added eissn from EUPMC_x000D_ Added grants data from EUPMC_x000D_ Added date of publication from EUPMC_x000D_ Added electronic publication date from EUPMC_x000D_ Checking if XML is available from EUPMC (since 6th March 20…	43514	1915.2	GBP	1915.2		JiscCollections_Taylor & Francis	0	0	CC-BY	Paid using leftover BIS funds, no charge to COAF	Unknown
Bristol	PMC6199754	30352597	10.1186/s12966-018-0735-8	Profiles of childrenÂ’s physical activity and sedentary behaviour between age 6 and 9: a latent profile and transition analysis	The international journal of behavioral nutrition and physical activity	TRUE	1479-5868	1479-5868	2018-10-01T00:00:00Z	2018-10-23T00:00:00Z	Springer Science and Business Media LLC	not applicable	cc-by	cc-by	epmc_api	epmc_api	TRUE	TRUE	FALSE	TRUE	TRUE	TRUE	Added PMCID from EUPMC_x000D_ Confirmed fulltext is in EUPMC_x000D_ Confirmed is open access from EUPMC_x000D_ Added journal title from EUPMC_x000D_ Added issn from EUPMC_x000D_ Added eissn from EUPMC_x000D_ Added grants data from EUPMC_x000D_ Added date of publication from EUPMC_x000D_ Added electronic publication date from EUPMC_x000D_ Checking if XML is available from EUPMC (since 6th March 20…	43427	2040	GBP	2040		None	2040	0	CC-BY		Unknown
Bristol	PMC7029249	30337338	10.1136/medhum-2018-011466	Â“Making the Invisible VisibleÂ”: an audience response to an art installation representing the complexity of congenital heart disease and heart transplantation	Medical humanities	FALSE	1468-215X, 1473-4265	1473-4265	2019-12-01T00:00:00Z	2018-10-18T00:00:00Z	BMJ	not applicable	cc-by	cc-by	epmc_api	epmc_api	TRUE	TRUE	FALSE	TRUE	TRUE	TRUE	Added PMCID from EUPMC_x000D_ Confirmed fulltext is in EUPMC_x000D_ Confirmed is open access from EUPMC_x000D_ Added journal title from EUPMC_x000D_ Added issn from EUPMC_x000D_ Added eissn from EUPMC_x000D_ Added grants data from EUPMC_x000D_ Added date of publication from EUPMC_x000D_ Added electronic publication date from EUPMC_x000D_ Checking if XML is available from EUPMC (since 6th March 20…	43536	2340	GBP	2340		Institutional_ membership discount	2340	0	CC-BY	Correction notice adding BHF to funders added. EPublished, in PubMed, but not PMC.	Unknown
Bristol	PMC6491994	30325021	10.1002/ijc.31929	Investigating the effects of lycopene and green tea on the metabolome of men at risk of prostate cancer: The ProDiet randomised controlled trial	International journal of cancer	FALSE	0020-7136, 1097-0215	1097-0215	2019-04-01T00:00:00Z	2018-12-07T00:00:00Z	Wiley	not applicable	cc-by	cc-by	epmc_api	epmc_api	TRUE	TRUE	FALSE	TRUE	TRUE	TRUE	Added PMCID from EUPMC_x000D_ Confirmed fulltext is in EUPMC_x000D_ Confirmed is open access from EUPMC_x000D_ Added journal title from EUPMC_x000D_ Added issn from EUPMC_x000D_ Added eissn from EUPMC_x000D_ Added grants data from EUPMC_x000D_ Added date of publication from EUPMC_x000D_ Added electronic publication date from EUPMC_x000D_ Checking if XML is available from EUPMC (since 6th March 20…	43440	3194.4	GBP	3194.4		None	3194.4	0	CC-BY		Unknown
Bristol	PMC6173354	30323899	10.18632/oncotarget.26093	Elucidating the novel BRCA1 function as a non-genomic metabolic restraint in ER-positive breast cancer cell lines	Oncotarget	FALSE	1949-2553	1949-2553	2018-09-01T00:00:00Z	2018-09-11T00:00:00Z	Impact Journals, LLC	not applicable	cc-by	cc-by	epmc_api	epmc_api	TRUE	TRUE	FALSE	TRUE	TRUE	TRUE	Added PMCID from EUPMC_x000D_ Confirmed fulltext is in EUPMC_x000D_ Confirmed is open access from EUPMC_x000D_ Added journal title from EUPMC_x000D_ Added issn from EUPMC_x000D_ Added eissn from EUPMC_x000D_ Added grants data from EUPMC_x000D_ Added date of publication from EUPMC_x000D_ Added electronic publication date from EUPMC_x000D_ Checking if XML is available from EUPMC (since 6th March 20…	43388	3400	USD	3211.72		None	3211.72	0	CC-BY		Unknown
Bristol	PMC6194454	30287668	10.1136/bmjopen-2018-021611	Smoking as a risk factor for lung cancer in women and men: a systematic review and meta-analysis	BMJ open	TRUE	2044-6055	2044-6055	2018-10-01T00:00:00Z	2018-10-03T00:00:00Z	BMJ	not applicable	cc-by	cc-by	epmc_api	epmc_api	TRUE	TRUE	FALSE	TRUE	TRUE	TRUE	Added PMCID from EUPMC_x000D_ Confirmed fulltext is in EUPMC_x000D_ Confirmed is open access from EUPMC_x000D_ Added journal title from EUPMC_x000D_ Added issn from EUPMC_x000D_ Added eissn from EUPMC_x000D_ Added grants data from EUPMC_x000D_ Added date of publication from EUPMC_x000D_ Added electronic publication date from EUPMC_x000D_ Checking if XML is available from EUPMC (since 6th March 20…	43382	1377	GBP	1377		Institutional_Prepayment	688.5	688.5	CC-BY		Unknown
Bristol	PMC6277430	30274787	10.1016/j.ymthe.2018.08.020	MicroRNA-532-5p regulates pericyte function through targeting the transcription regulator BACH1 and Angiopoietin-1	Molecular therapy : the journal of the American Society of Gene Therapy	FALSE	1525-0016, 1525-0024	1525-0024	2018-12-01T00:00:00Z	2018-09-01T00:00:00Z	Elsevier BV	not applicable	cc-by	cc-by	epmc_api	epmc_api	TRUE	TRUE	FALSE	TRUE	TRUE	TRUE	Added PMCID from EUPMC_x000D_ Confirmed fulltext is in EUPMC_x000D_ Confirmed is open access from EUPMC_x000D_ Added journal title from EUPMC_x000D_ Added issn from EUPMC_x000D_ Added eissn from EUPMC_x000D_ Added grants data from EUPMC_x000D_ Added date of publication from EUPMC_x000D_ Added electronic publication date from EUPMC_x000D_ Checking if XML is available from EUPMC (since 6th March 20…	43507	2827.91	EUR	3071.54		None	3071.54	0	CC-BY		Unknown
Bristol	PMC5909736	29505958	10.1016/j.neo.2018.01.009	Wnt Signalling Drives Context-Dependent Differentiation or Proliferation in Neuroblastoma	Neoplasia (New York, N.Y.)	TRUE	1522-8002, 1476-5586	1476-5586	2018-04-01T00:00:00Z	2018-03-03T00:00:00Z	Elsevier BV	Unknown	cc-by-nc-nd	cc-by-nc-nd	epmc_api	epmc_api	TRUE	TRUE	FALSE	TRUE	FALSE	FALSE	Added PMCID from EUPMC_x000D_ Confirmed fulltext is in EUPMC_x000D_ Confirmed is open access from EUPMC_x000D_ Added journal title from EUPMC_x000D_ Added issn from EUPMC_x000D_ Added eissn from EUPMC_x000D_ Added grants data from EUPMC_x000D_ Added date of publication from EUPMC_x000D_ Added electronic publication date from EUPMC_x000D_ Checking if XML is available from EUPMC (since 6th March 20…	43441	2209.3	EUR	3004.75		None	1502.38	1502.38	CC-BY		Unknown
Cardiff	Unknown	Unknown	10.1111/jols.12156	Law and Rhetoric: Critical Possibilities	Journal of Law and Society	FALSE	0263-323X	Unknown	2019-05-20T00:00:00Z	Unknown	Wiley	Unknown	cc-by	cc-by	Unknown	Unknown	FALSE	FALSE	FALSE	FALSE	FALSE	FALSE	Unable to locate article in EPMC._x000D_ Added publisher name from Crossref_x000D_ Added ISSN from Crossref_x000D_ Added journal title from Crossref_x000D_ Found DOI in CORE_x000D_ Searched OpenDOAR but could not find repo and/or URL_x000D_ Added repositories that CORE claims article is available from_x000D_ Found DOI in BASE_x000D_ Searched OpenDOAR but could not find repo and/or URL_x000D_ Not …	43558	1667	GBP	2000.4		None	2000.4		CC BY		Unknown
Cardiff	Unknown	Unknown	10.3233/JBR-180372	Impact of black raspberries on the normal and malignant Apc deficient murine gut microbiome	Journal of Berry Research	FALSE	1878-5093	Unknown	Unknown	Unknown	IOS Press	Unknown	cc-by	Unknown	Unknown	Unknown	FALSE	FALSE	FALSE	FALSE	FALSE	FALSE	Unable to locate article in EPMC._x000D_ Added publisher name from Crossref_x000D_ Added ISSN from Crossref_x000D_ Added journal title from Crossref_x000D_ Found DOI in CORE_x000D_ Searched OpenDOAR but could not find repo and/or URL_x000D_ Added repositories that CORE claims article is available from_x000D_ Found DOI in BASE_x000D_ Searched OpenDOAR but could not find repo and/or URL_x000D_ Not …	43531	Euro 1850.00	EUR	1970.18		None	1970.18				Unknown
Cardiff	Unknown	Unknown	10.1080/14636778.2019.1652804	Biomarkers and brains: situating dementia in the laboratory and in the memory clinic	New Genetics and Society	FALSE	1463-6778	Unknown	2019-08-31 T00:00:00Z	Unknown	Informa UK Limited	Unknown	cc-by	cc-by	Unknown	Unknown	FALSE	FALSE	FALSE	FALSE	FALSE	FALSE	Unable to locate article in EPMC._x000D_ Added publisher name from Crossref_x000D_ Added ISSN from Crossref_x000D_ Added journal title from Crossref_x000D_ Found DOI in CORE_x000D_ Searched OpenDOAR but could not find repo and/or URL_x000D_ Added repositories that CORE claims article is available from_x000D_ Found DOI in BASE_x000D_ Searched OpenDOAR but could not find repo and/or URL_x000D_ Not …	43690	498.75	GBP	598.5		JiscCollections_Taylor & Francis	598.5		CC BY		Unknown
Cardiff	Unknown	32166157	10.1177/2398212818811235	Lesions of retrosplenial cortex spare immediate-early gene activity in related limbic regions in the rat	Brain and neuroscience advances	FALSE	2398-2128	2398-2128	2018 Jan-Dec	2018-11-13T00:00:00Z	SAGE Publications	cc-by	cc-by	Unknown	publisher_splash_page	Unknown	FALSE	FALSE	FALSE	FALSE	FALSE	FALSE	Added PMID from EUPMC_x000D_ This article is not open access according to EUPMC, but since 6th March 2020 we take this to mean only that the publisher did not indicate to EUPMC that it can be included in their Open Access subset - it may well still be an OA article._x000D_ Added journal title from EUPMC_x000D_ Added issn from EUPMC_x000D_ Added eissn from EUPMC_x000D_ Added date of publication fr…	43411	600	GBP	720		None	720		CC BY		FALSE
Cardiff	PMC6849171	31711536	10.1186/s13326-019-0215-3	KLOSURE: Closing in on open-ended patient questionnaires with text mining	Journal of biomedical semantics	TRUE	2041-1480	2041-1480	2019-11-01T00:00:00Z	2019-11-12T00:00:00Z	Springer Science and Business Media LLC	not applicable	cc-by	cc-by	epmc_api	epmc_api	TRUE	TRUE	FALSE	TRUE	TRUE	TRUE	Added PMCID from EUPMC_x000D_ Added PMID from EUPMC_x000D_ Confirmed fulltext is in EUPMC_x000D_ Confirmed is open access from EUPMC_x000D_ Added journal title from EUPMC_x000D_ Added issn from EUPMC_x000D_ Added eissn from EUPMC_x000D_ Added grants data from EUPMC_x000D_ Added date of publication from EUPMC_x000D_ Added electronic publication date from EUPMC_x000D_ Checking if XML is available f…	43690	1030	GBP	1236		Institutional_ membership discount	1236		CC BY		Unknown
Cardiff	PMC6759954	31619970	10.3389/fncir.2019.00060	Why isnÂ’t the head-direction system necessary for direction? Lessons from the lateral mammillary nuclei	Frontiers in neural circuits	TRUE	1662-5110	1662-5110	2019-01-01T00:00:00Z	2019-09-13T00:00:00Z	Frontiers Media SA	not applicable	cc-by	cc-by	epmc_api	epmc_api	TRUE	TRUE	FALSE	TRUE	TRUE	TRUE	Added PMCID from EUPMC_x000D_ Confirmed fulltext is in EUPMC_x000D_ Confirmed is open access from EUPMC_x000D_ Added journal title from EUPMC_x000D_ Added issn from EUPMC_x000D_ Added eissn from EUPMC_x000D_ Added grants data from EUPMC_x000D_ Added date of publication from EUPMC_x000D_ Added electronic publication date from EUPMC_x000D_ Checking if XML is available from EUPMC (since 6th March 20…	43720	$1572.50	USD	1581.06		Institutional_ membership discount	1581.06		CC BY		Unknown
Cardiff	PMC6712910	31588413	10.1177/2398212819871205	Trajectory of hippocampal fibres to the contralateral anterior thalamus and mammillary bodies in rats, mice, and macaque monkeys	Brain and neuroscience advances	FALSE	2398-2128	2398-2128	2019-01-01T00:00:00Z	2019-08-23T00:00:00Z	SAGE Publications	not applicable	cc-by	cc-by	epmc_api	epmc_api	TRUE	TRUE	FALSE	TRUE	TRUE	TRUE	Added PMCID from EUPMC_x000D_ Confirmed fulltext is in EUPMC_x000D_ Confirmed is open access from EUPMC_x000D_ Added journal title from EUPMC_x000D_ Added issn from EUPMC_x000D_ Added eissn from EUPMC_x000D_ Added grants data from EUPMC_x000D_ Added date of publication from EUPMC_x000D_ Added electronic publication date from EUPMC_x000D_ Checking if XML is available from EUPMC (since 6th March 20…	43690	600	GBP	720		None	720		CC BY		Unknown
Cardiff	PMC6767699	31588199	10.1111/camh.12308	Adolescent self-harm prevention and intervention in secondary schools: A survey of staff in England and Wales	Child and adolescent mental health	FALSE	1475-357X, 1475-3588	1475-3588	2019-09-01T00:00:00Z	2018-12-05T00:00:00Z	Wiley	not applicable	cc-by	cc-by	epmc_api	epmc_api	TRUE	TRUE	FALSE	TRUE	TRUE	TRUE	Added PMCID from EUPMC_x000D_ Confirmed fulltext is in EUPMC_x000D_ Confirmed is open access from EUPMC_x000D_ Added journal title from EUPMC_x000D_ Added issn from EUPMC_x000D_ Added eissn from EUPMC_x000D_ Added grants data from EUPMC_x000D_ Added date of publication from EUPMC_x000D_ Added electronic publication date from EUPMC_x000D_ Checking if XML is available from EUPMC (since 6th March 20…	43426	1750	GBP	2100		None	2100		CC BY		Unknown
Cardiff	PMC6686626	31582873	10.1016/j.chb.2019.04.023	Identifying Indicators of Smartphone Addiction Through User-App Interaction	Computers in human behavior	FALSE	0747-5632	Unknown	2019-10-01T00:00:00Z	Unknown	Elsevier BV	not applicable	cc-by	cc-by	epmc_api	epmc_api	TRUE	TRUE	FALSE	TRUE	TRUE	TRUE	Added PMCID from EUPMC_x000D_ Confirmed fulltext is in EUPMC_x000D_ Confirmed is open access from EUPMC_x000D_ Added journal title from EUPMC_x000D_ Added issn from EUPMC_x000D_ Added grants data from EUPMC_x000D_ Added date of publication from EUPMC_x000D_ Checking if XML is available from EUPMC (since 6th March 2020 this is always done for any article we have a PMCID for, regardless of other EU…	43626	Euro 2016.00	EUR	1857.72		None	1857.72		CC BY		Unknown
Cardiff	PMC6765180	31488565	10.1242/dev.176495	CD40 forward signaling is a physiological regulator of early sensory axon growth	Development (Cambridge, England)	FALSE	0950-1991, 1477-9129	1477-9129	2019-09-01T00:00:00Z	2019-09-16T00:00:00Z	The Company of Biologists	not applicable	cc-by	cc-by	epmc_api	epmc_api	TRUE	TRUE	FALSE	TRUE	TRUE	TRUE	Added PMCID from EUPMC_x000D_ Confirmed fulltext is in EUPMC_x000D_ Confirmed is open access from EUPMC_x000D_ Added journal title from EUPMC_x000D_ Added issn from EUPMC_x000D_ Added eissn from EUPMC_x000D_ Added grants data from EUPMC_x000D_ Added date of publication from EUPMC_x000D_ Added electronic publication date from EUPMC_x000D_ Checking if XML is available from EUPMC (since 6th March 20…	43717	2500	GBP	3000		None	3000		CC BY		Unknown
Cardiff	PMC6796783	31483418	10.1039/c9mt00136k	Activated zinc transporter ZIP7 as an indicator of anti-hormone resistance in breast cancer	Metallomics : integrated biometal science	FALSE	1756-5901, 1756-591X	1756-591X	2019-09-01T00:00:00Z	2019-09-04T00:00:00Z	Royal Society of Chemistry (RSC)	not applicable	cc-by	cc-by	epmc_api	epmc_api	TRUE	TRUE	FALSE	TRUE	TRUE	TRUE	Added PMCID from EUPMC_x000D_ Confirmed fulltext is in EUPMC_x000D_ Confirmed is open access from EUPMC_x000D_ Added journal title from EUPMC_x000D_ Added issn from EUPMC_x000D_ Added eissn from EUPMC_x000D_ Added grants data from EUPMC_x000D_ Added date of publication from EUPMC_x000D_ Added electronic publication date from EUPMC_x000D_ Checking if XML is available from EUPMC (since 6th March 20…	43690	1360	GBP	1632		JiscCollections_RSC	1632		CC BY		Unknown
Cardiff	PMC6691182	31447813	10.3389/fmicb.2019.01800	Dependence on Dectin-1 varies with Multiple Candida species	Frontiers in microbiology	TRUE	1664-302X	1664-302X	2019-01-01T00:00:00Z	2019-08-06T00:00:00Z	Frontiers Media SA	not applicable	cc-by	cc-by	epmc_api	epmc_api	TRUE	TRUE	FALSE	TRUE	TRUE	TRUE	Added PMCID from EUPMC_x000D_ Confirmed fulltext is in EUPMC_x000D_ Confirmed is open access from EUPMC_x000D_ Added journal title from EUPMC_x000D_ Added issn from EUPMC_x000D_ Added eissn from EUPMC_x000D_ Added grants data from EUPMC_x000D_ Added date of publication from EUPMC_x000D_ Added electronic publication date from EUPMC_x000D_ Checking if XML is available from EUPMC (since 6th March 20…	43690	$2507.50	USD	2576.64		Institutional_ membership discount	2576.64		CC BY		Unknown
Cardiff	PMC6920044	31421398	10.1016/j.concog.2019.102797	Slow and steady? Strategic adjustments in response caution are moderately reliable and correlate across tasks	Consciousness and cognition	FALSE	1053-8100, 1090-2376	1090-2376	2019-10-01T00:00:00Z	2019-08-14T00:00:00Z	Elsevier BV	not applicable	cc-by	cc-by	epmc_api	epmc_api	TRUE	TRUE	FALSE	TRUE	TRUE	TRUE	Added PMCID from EUPMC_x000D_ Confirmed fulltext is in EUPMC_x000D_ Confirmed is open access from EUPMC_x000D_ Added journal title from EUPMC_x000D_ Added issn from EUPMC_x000D_ Added eissn from EUPMC_x000D_ Added grants data from EUPMC_x000D_ Added date of publication from EUPMC_x000D_ Added electronic publication date from EUPMC_x000D_ Checking if XML is available from EUPMC (since 6th March 20…	43655	1920	GBP	2304		None	2304		CC BY		Unknown
Cardiff	PMC6750183	31404778	10.1016/j.midw.2019.08.002	Â“Nobody knows, or seems to know how rheumatology and breastfeeding worksÂ”: WomenÂ’s experiences of breastfeeding whilst managing a long-term limiting condition- a qualitative visual methods study	Midwifery	FALSE	0266-6138, 1532-3099	1532-3099	2019-11-01T00:00:00Z	2019-08-06T00:00:00Z	Elsevier BV	not applicable	cc-by	cc-by	epmc_api	epmc_api	TRUE	TRUE	FALSE	TRUE	TRUE	TRUE	Added PMCID from EUPMC_x000D_ Confirmed fulltext is in EUPMC_x000D_ Confirmed is open access from EUPMC_x000D_ Added journal title from EUPMC_x000D_ Added issn from EUPMC_x000D_ Added eissn from EUPMC_x000D_ Added date of publication from EUPMC_x000D_ Added electronic publication date from EUPMC_x000D_ Checking if XML is available from EUPMC (since 6th March 2020 this is always done for any artic…	43690	2510	GBP	3012		None	3012		CC BY		Unknown
Cardiff	PMC6671959	31371763	10.1038/s41467-019-11119-7	Cyfip1Â haploinsufficient rats show white matter changes, myelin thinning, abnormal oligodendrocytes and behavioural inflexibility	Nature communications	TRUE	2041-1723	2041-1723	2019-08-01T00:00:00Z	2019-08-01T00:00:00Z	Springer Science and Business Media LLC	not applicable	cc-by	cc-by	epmc_api	epmc_api	TRUE	TRUE	FALSE	TRUE	TRUE	TRUE	Added PMCID from EUPMC_x000D_ Confirmed fulltext is in EUPMC_x000D_ Confirmed is open access from EUPMC_x000D_ Added journal title from EUPMC_x000D_ Added issn from EUPMC_x000D_ Added eissn from EUPMC_x000D_ Added grants data from EUPMC_x000D_ Added date of publication from EUPMC_x000D_ Added electronic publication date from EUPMC_x000D_ Checking if XML is available from EUPMC (since 6th March 20…	43651	3490	GBP	4188		None	4188		CC BY		Unknown
Cardiff	PMC6771694	31353475	10.1111/josh.12824	Use of the school setting during the summer holidays: Mixed-methods evaluation of Food and Fun Clubs in Wales	The Journal of school health	FALSE	0022-4391, 1746-1561	1746-1561	2019-10-01T00:00:00Z	2019-07-28T00:00:00Z	Wiley	not applicable	cc-by	cc-by	epmc_api	epmc_api	TRUE	TRUE	FALSE	TRUE	TRUE	TRUE	Added PMCID from EUPMC_x000D_ Confirmed fulltext is in EUPMC_x000D_ Confirmed is open access from EUPMC_x000D_ Added journal title from EUPMC_x000D_ Added issn from EUPMC_x000D_ Added eissn from EUPMC_x000D_ Added grants data from EUPMC_x000D_ Added date of publication from EUPMC_x000D_ Added electronic publication date from EUPMC_x000D_ Checking if XML is available from EUPMC (since 6th March 20…	43655	2000	GBP	2400		None	2400		CC BY		Unknown
Cardiff	PMC6597914	31312636	10.1159/000500267	Regulation and function of activity-dependent Homer in synaptic plasticity	Molecular neuropsychiatry	FALSE	2296-9209, 2296-9179	2296-9179	2019-06-01T00:00:00Z	2019-05-23T00:00:00Z	S. Karger AG	cc-by	cc-by	Unknown	publisher_splash_page	Unknown	TRUE	FALSE	FALSE	FALSE	FALSE	FALSE	Added PMCID from EUPMC_x000D_ Confirmed fulltext is in EUPMC_x000D_ This article is not open access according to EUPMC, but since 6th March 2020 we take this to mean only that the publisher did not indicate to EUPMC that it can be included in their Open Access subset - it may well still be an OA article._x000D_ Added journal title from EUPMC_x000D_ Added issn from EUPMC_x000D_ Added eissn from EU…	43622	CHF 3000.00	CHF	2960.77		None	2960.77		CC BY		Unknown
Cardiff	PMC6776821	31301758	10.1016/j.biopsych.2019.04.036	Associations between ADHD and various eating disorders: A Swedish nationwide population study using multiple genetically informative approaches	Biological psychiatry	FALSE	0006-3223, 1873-2402	1873-2402	2019-10-01T00:00:00Z	2019-05-15T00:00:00Z	Elsevier BV	not applicable	cc-by	cc-by	epmc_api	epmc_api	TRUE	TRUE	FALSE	TRUE	TRUE	TRUE	Added PMCID from EUPMC_x000D_ Confirmed fulltext is in EUPMC_x000D_ Confirmed is open access from EUPMC_x000D_ Added journal title from EUPMC_x000D_ Added issn from EUPMC_x000D_ Added eissn from EUPMC_x000D_ Added grants data from EUPMC_x000D_ Added date of publication from EUPMC_x000D_ Added electronic publication date from EUPMC_x000D_ Checking if XML is available from EUPMC (since 6th March 20…	43622	Euro 2850.00	EUR	3134.74		None	3134.74		CC BY		Unknown
Cardiff	PMC6951235	31296598	10.1136/archdischild-2019-316911	ProfessionalsÂ’ accounts of genetic testing in adoption: a qualitative study	Archives of disease in childhood	FALSE	0003-9888, 1468-2044	1468-2044	2020-01-01T00:00:00Z	2019-07-11T00:00:00Z	BMJ	not applicable	cc-by	cc-by	epmc_api	epmc_api	TRUE	TRUE	FALSE	TRUE	TRUE	TRUE	Added PMCID from EUPMC_x000D_ Confirmed fulltext is in EUPMC_x000D_ Confirmed is open access from EUPMC_x000D_ Added journal title from EUPMC_x000D_ Added issn from EUPMC_x000D_ Added eissn from EUPMC_x000D_ Added grants data from EUPMC_x000D_ Added date of publication from EUPMC_x000D_ Added electronic publication date from EUPMC_x000D_ Checking if XML is available from EUPMC (since 6th March 20…	43655	1950	GBP	2340		None	2340		CC BY		Unknown
Cardiff	PMC6783609	31243454	10.1093/qjmed/hcz161	Rituximab depletion of intrahepatic B cells to control refractory hepatic autoimmune overlap syndrome	QJM : monthly journal of the Association of Physicians	FALSE	1460-2725, 1460-2393	1460-2393	2019-10-01T00:00:00Z	Unknown	Oxford University Press (OUP)	not applicable	cc-by	cc-by	epmc_api	epmc_api	TRUE	TRUE	FALSE	TRUE	TRUE	TRUE	Added PMCID from EUPMC_x000D_ Confirmed fulltext is in EUPMC_x000D_ Confirmed is open access from EUPMC_x000D_ Added journal title from EUPMC_x000D_ Added issn from EUPMC_x000D_ Added eissn from EUPMC_x000D_ Added grants data from EUPMC_x000D_ Added date of publication from EUPMC_x000D_ Checking if XML is available from EUPMC (since 6th March 2020 this is always done for any article we have a PMC…	43642	2258	GBP	2709.6		None	2709.6		CC BY		Unknown
Cardiff	PMC6703878	31235646	10.1523/JNEUROSCI.0827-19.2019	Mammillothalamic disconnection alters hippocampo-cortical oscillatory activity and microstructure: Implications for diencephalic amnesia	The Journal of neuroscience : the official journal of the Society for Neuroscience	FALSE	0270-6474, 1529-2401	1529-2401	2019-08-01T00:00:00Z	2019-06-24T00:00:00Z	Society for Neuroscience	not applicable	cc-by	cc-by	epmc_api	epmc_api	TRUE	TRUE	FALSE	TRUE	TRUE	TRUE	Added PMCID from EUPMC_x000D_ Confirmed fulltext is in EUPMC_x000D_ Confirmed is open access from EUPMC_x000D_ Added journal title from EUPMC_x000D_ Added issn from EUPMC_x000D_ Added eissn from EUPMC_x000D_ Added grants data from EUPMC_x000D_ Added date of publication from EUPMC_x000D_ Added electronic publication date from EUPMC_x000D_ Checking if XML is available from EUPMC (since 6th March 20…	43634	$3110.00	USD	3080.99		None	3080.99		CC BY		Unknown
Cardiff	PMC6711466	31228638	10.1016/j.neuroimage.2019.06.020	Dimensionality reduction of diffusion MRI measures for improved tractometry of the human brain	NeuroImage	FALSE	1053-8119, 1095-9572	1095-9572	2019-10-01T00:00:00Z	2019-06-20T00:00:00Z	Elsevier BV	not applicable	cc-by	cc-by	epmc_api	epmc_api	TRUE	TRUE	FALSE	TRUE	TRUE	TRUE	Added PMCID from EUPMC_x000D_ Confirmed fulltext is in EUPMC_x000D_ Confirmed is open access from EUPMC_x000D_ Added journal title from EUPMC_x000D_ Added issn from EUPMC_x000D_ Added eissn from EUPMC_x000D_ Added grants data from EUPMC_x000D_ Added date of publication from EUPMC_x000D_ Added electronic publication date from EUPMC_x000D_ Checking if XML is available from EUPMC (since 6th March 20…	43642	2550	GBP	3060		None	3060		CC BY		Unknown
Cardiff	PMC6640913	31225596	10.1093/jnen/nlz046	Neuregulin-4 Is Required for the Growth and Elaboration of Striatal Medium Spiny Neuron Dendrites	Journal of neuropathology and experimental neurology	FALSE	0022-3069, 1554-6578	1554-6578	2019-05-01T00:00:00Z	2019-05-24T00:00:00Z	Oxford University Press (OUP)	not applicable	cc-by	cc-by	epmc_api	epmc_api	TRUE	TRUE	FALSE	TRUE	TRUE	TRUE	Added PMCID from EUPMC_x000D_ Confirmed fulltext is in EUPMC_x000D_ Confirmed is open access from EUPMC_x000D_ Added journal title from EUPMC_x000D_ Added issn from EUPMC_x000D_ Added eissn from EUPMC_x000D_ Added grants data from EUPMC_x000D_ Added date of publication from EUPMC_x000D_ Added electronic publication date from EUPMC_x000D_ Checking if XML is available from EUPMC (since 6th March 20…	43615	2310	GBP	2772		None	2772		CC BY		Unknown
Cardiff	PMC6585111	31221083	10.1186/s12876-019-1002-4	The Ussing chamber system for measuring intestinal permeability in health and disease	BMC gastroenterology	TRUE	1471-230X	1471-230X	2019-06-01T00:00:00Z	2019-06-20T00:00:00Z	Springer Science and Business Media LLC	not applicable	cc-by	cc-by	epmc_api	epmc_api	TRUE	TRUE	FALSE	TRUE	TRUE	TRUE	Added PMCID from EUPMC_x000D_ Confirmed fulltext is in EUPMC_x000D_ Confirmed is open access from EUPMC_x000D_ Added journal title from EUPMC_x000D_ Added issn from EUPMC_x000D_ Added eissn from EUPMC_x000D_ Added grants data from EUPMC_x000D_ Added date of publication from EUPMC_x000D_ Added electronic publication date from EUPMC_x000D_ Checking if XML is available from EUPMC (since 6th March 20…	43642	1214.5	GBP	1457.4		Institutional_ membership discount	1457.4		CC BY		Unknown
Cardiff	PMC6635810	31209152	10.1523/ENEURO.0364-18.2019	Cyfip1 haploinsufficiency does not alter GABAA receptor ?-subunit expression and tonic inhibition in dentate gyrus PV+ interneurons and granule cells.	eNeuro	TRUE	2373-2822	2373-2822	2019 May-Jun	2019-06-28T00:00:00Z	Society for Neuroscience	not applicable	cc-by	cc-by	epmc_api	epmc_api	TRUE	TRUE	FALSE	TRUE	TRUE	TRUE	Added PMCID from EUPMC_x000D_ Confirmed fulltext is in EUPMC_x000D_ Confirmed is open access from EUPMC_x000D_ Added journal title from EUPMC_x000D_ Added issn from EUPMC_x000D_ Added eissn from EUPMC_x000D_ Added grants data from EUPMC_x000D_ Added date of publication from EUPMC_x000D_ Added electronic publication date from EUPMC_x000D_ Checking if XML is available from EUPMC (since 6th March 20…	43626	$2925.00	USD	2863.44		None	2863.44		CC BY		Unknown
Cardiff	PMC6600601	31181693	10.3390/ijms20112799	Scavenging of Retinoid Cation Radicals by Urate,Trolox, and ?-, ?-, ?-, and ?-Tocopherols	International journal of molecular sciences	TRUE	1422-0067	1422-0067	2019-06-01T00:00:00Z	2019-06-07T00:00:00Z	MDPI AG	not applicable	cc-by	cc-by	epmc_api	epmc_api	TRUE	TRUE	FALSE	TRUE	TRUE	TRUE	Added PMCID from EUPMC_x000D_ Confirmed fulltext is in EUPMC_x000D_ Confirmed is open access from EUPMC_x000D_ Added journal title from EUPMC_x000D_ Added issn from EUPMC_x000D_ Added eissn from EUPMC_x000D_ Added grants data from EUPMC_x000D_ Added date of publication from EUPMC_x000D_ Added electronic publication date from EUPMC_x000D_ Checking if XML is available from EUPMC (since 6th March 20…	43642	1116.01	GBP	1339.21		Institutional_ membership discount	1339.21		CC BY		Unknown
Cardiff	PMC6693529	31176831	10.1016/j.neuroimage.2019.05.052	Optimization of graph construction can significantly increase the power of structural brain network studies	NeuroImage	FALSE	1053-8119, 1095-9572	1095-9572	2019-10-01T00:00:00Z	2019-06-06T00:00:00Z	Elsevier BV	not applicable	cc-by	cc-by	epmc_api	epmc_api	TRUE	TRUE	FALSE	TRUE	TRUE	TRUE	Added PMCID from EUPMC_x000D_ Confirmed fulltext is in EUPMC_x000D_ Confirmed is open access from EUPMC_x000D_ Added journal title from EUPMC_x000D_ Added issn from EUPMC_x000D_ Added eissn from EUPMC_x000D_ Added grants data from EUPMC_x000D_ Added date of publication from EUPMC_x000D_ Added electronic publication date from EUPMC_x000D_ Checking if XML is available from EUPMC (since 6th March 20…	43642	2550	GBP	3060		None	3060		CC BY		Unknown
Cardiff	PMC6650993	31123103	10.1523/JNEUROSCI.2954-18.2019	Cognitive and white-matter compartment models reveal selective relations between corticospinal tract microstructure and simple reaction time	The Journal of neuroscience : the official journal of the Society for Neuroscience	FALSE	0270-6474, 1529-2401	1529-2401	2019-07-01T00:00:00Z	2019-05-23T00:00:00Z	Society for Neuroscience	not applicable	cc-by	cc-by	epmc_api	epmc_api	TRUE	TRUE	FALSE	TRUE	TRUE	TRUE	Added PMCID from EUPMC_x000D_ Confirmed fulltext is in EUPMC_x000D_ Confirmed is open access from EUPMC_x000D_ Added journal title from EUPMC_x000D_ Added issn from EUPMC_x000D_ Added eissn from EUPMC_x000D_ Added grants data from EUPMC_x000D_ Added date of publication from EUPMC_x000D_ Added electronic publication date from EUPMC_x000D_ Checking if XML is available from EUPMC (since 6th March 20…	43594	$3110.00	USD	2973.23		None	2973.23		CC BY		Unknown
Cardiff	PMC6538016	31122972	10.1136/bmjopen-2018-025902	Engaging high-risk groups in early lung cancer diagnosis: a qualitative study of symptom presentation and intervention preferences amongst the UKÂ’s most deprived communities	BMJ open	TRUE	2044-6055	2044-6055	2019-05-01T00:00:00Z	2019-05-22T00:00:00Z	BMJ	not applicable	cc-by	cc-by	epmc_api	epmc_api	TRUE	TRUE	FALSE	TRUE	TRUE	TRUE	Added PMCID from EUPMC_x000D_ Confirmed fulltext is in EUPMC_x000D_ Confirmed is open access from EUPMC_x000D_ Added journal title from EUPMC_x000D_ Added issn from EUPMC_x000D_ Added eissn from EUPMC_x000D_ Added grants data from EUPMC_x000D_ Added date of publication from EUPMC_x000D_ Added electronic publication date from EUPMC_x000D_ Checking if XML is available from EUPMC (since 6th March 20…	43566	1350	GBP	1620		None	1620		CC BY		Unknown
Cardiff	PMC6620185	31120547	10.1111/imm.13083	Development and characterisation of novel anti-C5 monoclonal antibodies capable of inhibiting complement in multiple species	Immunology	FALSE	0019-2805, 1365-2567	1365-2567	2019-08-01T00:00:00Z	2019-06-17T00:00:00Z	Wiley	not applicable	cc-by	cc-by	epmc_api	epmc_api	TRUE	TRUE	FALSE	TRUE	TRUE	TRUE	Added PMCID from EUPMC_x000D_ Confirmed fulltext is in EUPMC_x000D_ Confirmed is open access from EUPMC_x000D_ Added journal title from EUPMC_x000D_ Added issn from EUPMC_x000D_ Added eissn from EUPMC_x000D_ Added grants data from EUPMC_x000D_ Added date of publication from EUPMC_x000D_ Added electronic publication date from EUPMC_x000D_ Checking if XML is available from EUPMC (since 6th March 20…	43655	1333.4	GBP	1600.08		None	1600.08		CC BY		Unknown
Cardiff	PMC6618058	31091334	10.1002/eji.201948085	TCR-induced alteration of primary MHC peptide anchor residue	European journal of immunology	FALSE	0014-2980, 1521-4141	1521-4141	2019-07-01T00:00:00Z	2019-05-27T00:00:00Z	Wiley	not applicable	cc-by	cc-by	epmc_api	epmc_api	TRUE	TRUE	FALSE	TRUE	TRUE	TRUE	Added PMCID from EUPMC_x000D_ Confirmed fulltext is in EUPMC_x000D_ Confirmed is open access from EUPMC_x000D_ Added journal title from EUPMC_x000D_ Added issn from EUPMC_x000D_ Added eissn from EUPMC_x000D_ Added grants data from EUPMC_x000D_ Added date of publication from EUPMC_x000D_ Added electronic publication date from EUPMC_x000D_ Checking if XML is available from EUPMC (since 6th March 20…	43615	2500	GBP	3000		None	3000		CC BY		Unknown
Cardiff	PMC6501059	31080872	10.1016/j.dadm.2019.03.005	Associations between rare microglia-linked AlzheimerÂ’s disease risk variants and subcortical brain volumes in young individuals	Alzheimer's & dementia (Amsterdam, Netherlands)	FALSE	2352-8729	2352-8729	2019-12-01T00:00:00Z	2019-05-02T00:00:00Z	Wiley	not applicable	cc-by	cc-by	epmc_api	epmc_api	TRUE	TRUE	FALSE	TRUE	TRUE	TRUE	Added PMCID from EUPMC_x000D_ Confirmed fulltext is in EUPMC_x000D_ Confirmed is open access from EUPMC_x000D_ Added journal title from EUPMC_x000D_ Added issn from EUPMC_x000D_ Added eissn from EUPMC_x000D_ Added grants data from EUPMC_x000D_ Added date of publication from EUPMC_x000D_ Added electronic publication date from EUPMC_x000D_ Checking if XML is available from EUPMC (since 6th March 20…	43566	Euro 1720.00	EUR	1837.28		None	1837.28		CC BY		Unknown
Cardiff	PMC6498996	31080552	10.18632/oncotarget.26830	Rapid Activation of Epithelial-Mesenchymal Transition Drives PARP Inhibitor Resistance in Brca2-Mutant Mammary Tumours	Oncotarget	FALSE	1949-2553	1949-2553	2019-04-01T00:00:00Z	2019-04-05T00:00:00Z	Impact Journals, LLC	not applicable	cc-by	cc-by	epmc_api	epmc_api	TRUE	TRUE	FALSE	TRUE	TRUE	TRUE	Added PMCID from EUPMC_x000D_ Confirmed fulltext is in EUPMC_x000D_ Confirmed is open access from EUPMC_x000D_ Added journal title from EUPMC_x000D_ Added issn from EUPMC_x000D_ Added eissn from EUPMC_x000D_ Added grants data from EUPMC_x000D_ Added date of publication from EUPMC_x000D_ Added electronic publication date from EUPMC_x000D_ Checking if XML is available from EUPMC (since 6th March 20…	43578	$3400.00	USD	3210.32		None	3210.32		CC BY		Unknown
Cardiff	PMC6556573	31061099	10.1074/jbc.RA119.008915	Revising the structure of a new eicosanoid from human platelets to 8,9-11,12-diepoxy-13- hydroxy-eicosadienoic acid	The Journal of biological chemistry	FALSE	0021-9258, 1083-351X	1083-351X	2019-06-01T00:00:00Z	2019-05-06T00:00:00Z	American Society for Biochemistry & Molecular Biology (ASBMB)	not applicable	cc-by	cc-by	epmc_api	epmc_api	TRUE	TRUE	FALSE	TRUE	TRUE	TRUE	Added PMCID from EUPMC_x000D_ Confirmed fulltext is in EUPMC_x000D_ Confirmed is open access from EUPMC_x000D_ Added journal title from EUPMC_x000D_ Added issn from EUPMC_x000D_ Added eissn from EUPMC_x000D_ Added grants data from EUPMC_x000D_ Added date of publication from EUPMC_x000D_ Added electronic publication date from EUPMC_x000D_ Checking if XML is available from EUPMC (since 6th March 20…	43651	$2000.00	USD	1977.59		None	1977.59		CC BY		Unknown
Cardiff	PMC6565806	31047856	10.1016/j.jalz.2019.03.007	Inflammatory biomarkers in AlzheimerÂ’s disease plasma	Alzheimer's & dementia : the journal of the Alzheimer's Association	FALSE	1552-5260, 1552-5279	1552-5279	2019-06-01T00:00:00Z	2019-04-30T00:00:00Z	Wiley	not applicable	cc-by	cc-by	epmc_api	epmc_api	TRUE	TRUE	FALSE	TRUE	TRUE	TRUE	Added PMCID from EUPMC_x000D_ Confirmed fulltext is in EUPMC_x000D_ Confirmed is open access from EUPMC_x000D_ Added journal title from EUPMC_x000D_ Added issn from EUPMC_x000D_ Added eissn from EUPMC_x000D_ Added grants data from EUPMC_x000D_ Added date of publication from EUPMC_x000D_ Added electronic publication date from EUPMC_x000D_ Checking if XML is available from EUPMC (since 6th March 20…	43600	Euro 2590.00	EUR	2743.16		None	2743.16		CC BY		Unknown
Cardiff	PMC6495368	31042271	10.1001/jamapsychiatry.2019.0774	Association of Maternal Neurodevelopmental Risk Alleles With Early-Life Exposures	JAMA psychiatry	FALSE	2168-622X, 2168-6238	2168-6238	2019-05-01T00:00:00Z	2019-05-01T00:00:00Z	American Medical Association (AMA)	not applicable	cc-by	cc-by	epmc_api	epmc_api	TRUE	TRUE	FALSE	TRUE	TRUE	TRUE	Added PMCID from EUPMC_x000D_ Confirmed fulltext is in EUPMC_x000D_ Confirmed is open access from EUPMC_x000D_ Added journal title from EUPMC_x000D_ Added issn from EUPMC_x000D_ Added eissn from EUPMC_x000D_ Added grants data from EUPMC_x000D_ Added date of publication from EUPMC_x000D_ Added electronic publication date from EUPMC_x000D_ Checking if XML is available from EUPMC (since 6th March 20…	43544	$5000.00	USD	4689.34		None	4689.34		CC BY		Unknown
Cardiff	PMC6771576	31038818	10.1002/chem.201901627	A GAP-GTPase-GDP-Pi Intermediate Crystal Structure Analyzed by DFT Shows GTP Hydrolysis Involves Serial Proton Transfers	Chemistry (Weinheim an der Bergstrasse, Germany)	FALSE	0947-6539, 1521-3765	1521-3765	2019-06-01T00:00:00Z	2019-05-27T00:00:00Z	Wiley	not applicable	cc-by	cc-by	epmc_api	epmc_api	TRUE	TRUE	FALSE	TRUE	TRUE	TRUE	Added PMCID from EUPMC_x000D_ Confirmed fulltext is in EUPMC_x000D_ Confirmed is open access from EUPMC_x000D_ Added journal title from EUPMC_x000D_ Added issn from EUPMC_x000D_ Added eissn from EUPMC_x000D_ Added grants data from EUPMC_x000D_ Added date of publication from EUPMC_x000D_ Added electronic publication date from EUPMC_x000D_ Checking if XML is available from EUPMC (since 6th March 20…	43642	2650	GBP	3180		None	3180		CC BY		Unknown
Cardiff	PMC6485173	31023293	10.1186/s12889-019-6741-1	Formative research to develop a school-based, community-linked physical activity role model programme for girls: CHoosing Active Role Models to INspire Girls (CHARMING)	BMC public health	TRUE	1471-2458	1471-2458	2019-04-01T00:00:00Z	2019-04-25T00:00:00Z	Springer Science and Business Media LLC	not applicable	cc-by	cc-by	epmc_api	epmc_api	TRUE	TRUE	FALSE	TRUE	TRUE	TRUE	Added PMCID from EUPMC_x000D_ Confirmed fulltext is in EUPMC_x000D_ Confirmed is open access from EUPMC_x000D_ Added journal title from EUPMC_x000D_ Added issn from EUPMC_x000D_ Added eissn from EUPMC_x000D_ Added grants data from EUPMC_x000D_ Added date of publication from EUPMC_x000D_ Added electronic publication date from EUPMC_x000D_ Checking if XML is available from EUPMC (since 6th March 20…	43578	1214.5	GBP	1457.4		Institutional_ membership discount	1457.4		CC BY		Unknown
Cardiff	PMC6788820	31019047	10.1523/JNEUROSCI.3041-18.2019	How the human brain segments continuous experience	The Journal of neuroscience : the official journal of the Society for Neuroscience	FALSE	0270-6474, 1529-2401	1529-2401	2019-04-01T00:00:00Z	Unknown	Society for Neuroscience	not applicable	cc-by	cc-by	epmc_api	epmc_api	TRUE	TRUE	FALSE	TRUE	TRUE	TRUE	Added PMCID from EUPMC_x000D_ Confirmed fulltext is in EUPMC_x000D_ Confirmed is open access from EUPMC_x000D_ Added journal title from EUPMC_x000D_ Added issn from EUPMC_x000D_ Added eissn from EUPMC_x000D_ Added date of publication from EUPMC_x000D_ Checking if XML is available from EUPMC (since 6th March 2020 this is always done for any article we have a PMCID for, regardless of other EUPMC AP…	43532	$3110.00	USD	2948.57		None	2948.57		CC BY		Unknown
Cardiff	PMC6583866	30994872	10.1001/jamapsychiatry.2019.0566	The role of rare copy number variants in depression	JAMA psychiatry	FALSE	2168-622X, 2168-6238	2168-6238	2019-04-01T00:00:00Z	2019-04-17T00:00:00Z	American Medical Association (AMA)	not applicable	cc-by	cc-by	epmc_api	epmc_api	TRUE	TRUE	FALSE	TRUE	TRUE	TRUE	Added PMCID from EUPMC_x000D_ Confirmed fulltext is in EUPMC_x000D_ Confirmed is open access from EUPMC_x000D_ Added journal title from EUPMC_x000D_ Added issn from EUPMC_x000D_ Added eissn from EUPMC_x000D_ Added grants data from EUPMC_x000D_ Added date of publication from EUPMC_x000D_ Added electronic publication date from EUPMC_x000D_ Checking if XML is available from EUPMC (since 6th March 20…	43531	$5000.00	USD	4725.53		None	4725.53		CC BY		Unknown
Cardiff	PMC6335459	30966915	10.1098/rstb.2018.0144	Feeding behaviour, risk-sensitivity and response control; effects of 5-HT2C receptor manipulations	Philosophical transactions of the Royal Society of London. Series B, Biological sciences	FALSE	0962-8436, 1471-2970	1471-2970	2019-02-01T00:00:00Z	Unknown	The Royal Society	not applicable	cc-by	cc-by	epmc_api	epmc_api	TRUE	TRUE	FALSE	TRUE	TRUE	TRUE	Added PMCID from EUPMC_x000D_ Confirmed fulltext is in EUPMC_x000D_ Confirmed is open access from EUPMC_x000D_ Added journal title from EUPMC_x000D_ Added issn from EUPMC_x000D_ Added eissn from EUPMC_x000D_ Added grants data from EUPMC_x000D_ Added date of publication from EUPMC_x000D_ Checking if XML is available from EUPMC (since 6th March 2020 this is always done for any article we have a PMC…	43433	1275	GBP	1530		Institutional_ membership discount	1530		CC BY		Unknown
Cardiff	PMC6811829	30945745	10.1093/schbul/sby190	Top-down suppression of sensory cortex in an NMDAR hypofunction model of psychosis	Schizophrenia bulletin	FALSE	1787-9965, 1745-1701	1745-1701	2019-10-01T00:00:00Z	Unknown	Oxford University Press (OUP)	not applicable	cc-by	cc-by	epmc_api	epmc_api	TRUE	TRUE	FALSE	TRUE	TRUE	TRUE	Added PMCID from EUPMC_x000D_ Confirmed fulltext is in EUPMC_x000D_ Confirmed is open access from EUPMC_x000D_ Added journal title from EUPMC_x000D_ Added issn from EUPMC_x000D_ Added eissn from EUPMC_x000D_ Added grants data from EUPMC_x000D_ Added date of publication from EUPMC_x000D_ Checking if XML is available from EUPMC (since 6th March 2020 this is always done for any article we have a PMC…	43531	2231	GBP	2677.2		None	2677.2		CC BY		Unknown
Cardiff	PMC6475397	30944221	10.1073/pnas.1814409116	Phospholipid membranes drive abdominal aortic aneurysm development through stimulating coagulation factor activity	Proceedings of the National Academy of Sciences of the United States of America	FALSE	0027-8424, 1091-6490	1091-6490	2019-04-01T00:00:00Z	2019-04-03T00:00:00Z	Proceedings of the National Academy of Sciences	not applicable	cc-by	cc-by	epmc_api	epmc_api	TRUE	TRUE	FALSE	TRUE	TRUE	TRUE	Added PMCID from EUPMC_x000D_ Confirmed fulltext is in EUPMC_x000D_ Confirmed is open access from EUPMC_x000D_ Added journal title from EUPMC_x000D_ Added issn from EUPMC_x000D_ Added eissn from EUPMC_x000D_ Added grants data from EUPMC_x000D_ Added date of publication from EUPMC_x000D_ Added electronic publication date from EUPMC_x000D_ Checking if XML is available from EUPMC (since 6th March 20…	43578	$2200.00	USD	2110.99		None	2110.99		CC BY		Unknown
Cardiff	PMC6445073	30940840	10.1038/s41598-019-41811-z	ADAM17-dependent proteolysis of L-selectin promotes early clonal expansion of cytotoxic T cells	Scientific reports	TRUE	2045-2322	2045-2322	2019-04-01T00:00:00Z	2019-04-02T00:00:00Z	Springer Science and Business Media LLC	not applicable	cc-by	cc-by	epmc_api	epmc_api	TRUE	TRUE	FALSE	TRUE	TRUE	TRUE	Added PMCID from EUPMC_x000D_ Confirmed fulltext is in EUPMC_x000D_ Confirmed is open access from EUPMC_x000D_ Added journal title from EUPMC_x000D_ Added issn from EUPMC_x000D_ Added eissn from EUPMC_x000D_ Added grants data from EUPMC_x000D_ Added date of publication from EUPMC_x000D_ Added electronic publication date from EUPMC_x000D_ Checking if XML is available from EUPMC (since 6th March 20…	43544	1290	GBP	1548		None	1548		CC BY		Unknown
Cardiff	PMC7036293	30936390	10.1136/tobaccocontrol-2018-054584	Have e-cigarettes renormalised or displaced youth smoking? Results of a segmented regression analysis of repeated cross sectional survey data in England, Scotland and Wales	Tobacco control	FALSE	0964-4563, 1468-3318	1468-3318	2020-03-01T00:00:00Z	2019-04-01T00:00:00Z	BMJ	not applicable	cc-by	cc-by	epmc_api	epmc_api	TRUE	TRUE	FALSE	TRUE	TRUE	TRUE	Added PMCID from EUPMC_x000D_ Confirmed fulltext is in EUPMC_x000D_ Confirmed is open access from EUPMC_x000D_ Added journal title from EUPMC_x000D_ Added issn from EUPMC_x000D_ Added eissn from EUPMC_x000D_ Added grants data from EUPMC_x000D_ Added date of publication from EUPMC_x000D_ Added electronic publication date from EUPMC_x000D_ Checking if XML is available from EUPMC (since 6th March 20…	43489	1950	GBP	2340		None	2340		CC BY		Unknown
Cardiff	Unknown	30932322	10.1111/gbb.12571	Detailed analysis of paternal knockout Grb10 mice suggests effects on stability of social behavior, rather than social dominance	Genes, brain, and behavior	FALSE	1601-1848, 1601-183X	1601-183X	2020-01-01T00:00:00Z	2019-04-29T00:00:00Z	Wiley	cc-by	cc-by	Unknown	publisher_splash_page	Unknown	FALSE	FALSE	FALSE	FALSE	FALSE	FALSE	This article is not open access according to EUPMC, but since 6th March 2020 we take this to mean only that the publisher did not indicate to EUPMC that it can be included in their Open Access subset - it may well still be an OA article._x000D_ Added journal title from EUPMC_x000D_ Added issn from EUPMC_x000D_ Added eissn from EUPMC_x000D_ Added grants data from EUPMC_x000D_ Added date of publica…	43566	2000	GBP	2400		None	2400		CC BY		FALSE
Cardiff	PMC6425991	30930889	10.3389/fimmu.2019.00319	Peptide Super-agonist enhances T-cell Responses to Melanoma	Frontiers in immunology	TRUE	1664-3224	1664-3224	2019-01-01T00:00:00Z	2019-03-13T00:00:00Z	Frontiers Media SA	not applicable	cc-by	cc-by	epmc_api	epmc_api	TRUE	TRUE	FALSE	TRUE	TRUE	TRUE	Added PMCID from EUPMC_x000D_ Confirmed fulltext is in EUPMC_x000D_ Confirmed is open access from EUPMC_x000D_ Added journal title from EUPMC_x000D_ Added issn from EUPMC_x000D_ Added eissn from EUPMC_x000D_ Added grants data from EUPMC_x000D_ Added date of publication from EUPMC_x000D_ Added electronic publication date from EUPMC_x000D_ Checking if XML is available from EUPMC (since 6th March 20…	43517	$2256.75	USD	2142.48		Institutional_ membership discount	2142.48		CC BY		Unknown
Cardiff	PMC6480971	30925676	10.3390/ijerph16071107	Socio-economic inequalities in adolescent summer holiday experiences, and mental wellbeing on return to school: analysis of the School Health Research Network / Health Behaviour in School-aged Children survey in Wales	International journal of environmental research and public health	TRUE	1661-7827, 1660-4601	1660-4601	2019-03-01T00:00:00Z	2019-03-28T00:00:00Z	MDPI AG	not applicable	cc-by	cc-by	epmc_api	epmc_api	TRUE	TRUE	FALSE	TRUE	TRUE	TRUE	Added PMCID from EUPMC_x000D_ Confirmed fulltext is in EUPMC_x000D_ Confirmed is open access from EUPMC_x000D_ Added journal title from EUPMC_x000D_ Added issn from EUPMC_x000D_ Added eissn from EUPMC_x000D_ Added grants data from EUPMC_x000D_ Added date of publication from EUPMC_x000D_ Added electronic publication date from EUPMC_x000D_ Checking if XML is available from EUPMC (since 6th March 20…	43558	1219.94	GBP	1463.93		Institutional_ membership discount	1463.93		CC BY		Unknown
Cardiff	PMC6547053	30910727	10.1016/j.neuroimage.2019.03.038	Pre-retrieval event-related potentials predict source memory during task switching	NeuroImage	FALSE	1053-8119, 1095-9572	1095-9572	2019-07-01T00:00:00Z	2019-03-22T00:00:00Z	Elsevier BV	not applicable	cc-by	cc-by	epmc_api	epmc_api	TRUE	TRUE	FALSE	TRUE	TRUE	TRUE	Added PMCID from EUPMC_x000D_ Confirmed fulltext is in EUPMC_x000D_ Confirmed is open access from EUPMC_x000D_ Added journal title from EUPMC_x000D_ Added issn from EUPMC_x000D_ Added eissn from EUPMC_x000D_ Added grants data from EUPMC_x000D_ Added date of publication from EUPMC_x000D_ Added electronic publication date from EUPMC_x000D_ Checking if XML is available from EUPMC (since 6th March 20…	43558	Euro 2590.00	EUR	2743.16		None	2743.16		CC BY		Unknown
Cardiff	PMC6767365	30908655	10.1111/jcpp.13053	Childhood neurodevelopmental difficulties and risk for adolescent depression: the role of irritability	Journal of child psychology and psychiatry, and allied disciplines	FALSE	0021-9630, 1469-7610	1469-7610	2019-08-01T00:00:00Z	2019-03-25T00:00:00Z	Wiley	not applicable	cc-by	cc-by	epmc_api	epmc_api	TRUE	TRUE	FALSE	TRUE	TRUE	TRUE	Added PMCID from EUPMC_x000D_ Confirmed fulltext is in EUPMC_x000D_ Confirmed is open access from EUPMC_x000D_ Added journal title from EUPMC_x000D_ Added issn from EUPMC_x000D_ Added eissn from EUPMC_x000D_ Added grants data from EUPMC_x000D_ Added date of publication from EUPMC_x000D_ Added electronic publication date from EUPMC_x000D_ Checking if XML is available from EUPMC (since 6th March 20…	43544	2533	GBP	3039.6		None	3039.6		CC BY		Unknown
Cardiff	PMC6563497	30891838	10.1002/hbm.24568	Comparing MRI metrics to quantify white matter microstructural damage in multiple sclerosis	Human brain mapping	FALSE	1065-9471, 1097-0193	1097-0193	2019-07-01T00:00:00Z	2019-03-19T00:00:00Z	Wiley	not applicable	cc-by	cc-by	epmc_api	epmc_api	TRUE	TRUE	FALSE	TRUE	TRUE	TRUE	Added PMCID from EUPMC_x000D_ Confirmed fulltext is in EUPMC_x000D_ Confirmed is open access from EUPMC_x000D_ Added journal title from EUPMC_x000D_ Added issn from EUPMC_x000D_ Added eissn from EUPMC_x000D_ Added grants data from EUPMC_x000D_ Added date of publication from EUPMC_x000D_ Added electronic publication date from EUPMC_x000D_ Checking if XML is available from EUPMC (since 6th March 20…	43578	3200	GBP	3840		None	3840		CC BY		Unknown
Cardiff	PMC6767057	30875134	10.1111/imcb.12248	The peripheral differentiation of human natural killer T cells	Immunology and cell biology	FALSE	0818-9641, 1440-1711	1440-1711	2019-07-01T00:00:00Z	2019-04-08T00:00:00Z	Wiley	not applicable	cc-by	cc-by	epmc_api	epmc_api	TRUE	TRUE	FALSE	TRUE	TRUE	TRUE	Added PMCID from EUPMC_x000D_ Confirmed fulltext is in EUPMC_x000D_ Confirmed is open access from EUPMC_x000D_ Added journal title from EUPMC_x000D_ Added issn from EUPMC_x000D_ Added eissn from EUPMC_x000D_ Added grants data from EUPMC_x000D_ Added date of publication from EUPMC_x000D_ Added electronic publication date from EUPMC_x000D_ Checking if XML is available from EUPMC (since 6th March 20…	43578	2000	GBP	2400		None	2400		CC BY		Unknown
Cardiff	PMC6499312	30872351	10.1101/gr.240705.118	Chromothripsis during telomere crisis is independent of NHEJ and consistent with a replicative origin	Genome research	FALSE	1088-9051, 1549-5469	1549-5469	2019-05-01T00:00:00Z	2019-03-14T00:00:00Z	Cold Spring Harbor Laboratory	not applicable	cc-by	cc-by	epmc_api	epmc_api	TRUE	FALSE	FALSE	FALSE	TRUE	FALSE	Added PMCID from EUPMC_x000D_ Confirmed fulltext is in EUPMC_x000D_ This article is not open access according to EUPMC, but since 6th March 2020 we take this to mean only that the publisher did not indicate to EUPMC that it can be included in their Open Access subset - it may well still be an OA article._x000D_ Added journal title from EUPMC_x000D_ Added issn from EUPMC_x000D_ Added eissn from EU…	43600	$2500.00	USD	2408.28		None	2408.28		CC BY		Unknown
Cardiff	PMC6563468	30865358	10.1002/hbm.24566	Neurochemical correlates of scene processing in the precuneus/posterior cingulate cortex: a multimodal fMRI 1H-MRS study	Human brain mapping	FALSE	1065-9471, 1097-0193	1097-0193	2019-07-01T00:00:00Z	2019-03-13T00:00:00Z	Wiley	not applicable	cc-by	cc-by	epmc_api	epmc_api	TRUE	TRUE	FALSE	TRUE	TRUE	TRUE	Added PMCID from EUPMC_x000D_ Confirmed fulltext is in EUPMC_x000D_ Confirmed is open access from EUPMC_x000D_ Added journal title from EUPMC_x000D_ Added issn from EUPMC_x000D_ Added eissn from EUPMC_x000D_ Added grants data from EUPMC_x000D_ Added date of publication from EUPMC_x000D_ Added electronic publication date from EUPMC_x000D_ Checking if XML is available from EUPMC (since 6th March 20…	43544	3200	GBP	3840		None	3840		CC BY		Unknown
Cardiff	PMC6902807	30834820	10.1177/0306312719834069	Somaticization, the making and unmaking of minded persons and the fabrication of dementia	Social studies of science	FALSE	0306-3127, 1460-3659	1460-3659	2019-04-01T00:00:00Z	2019-03-05T00:00:00Z	SAGE Publications	not applicable	cc-by	cc-by	epmc_api	epmc_api	TRUE	TRUE	FALSE	TRUE	TRUE	TRUE	Added PMCID from EUPMC_x000D_ Confirmed fulltext is in EUPMC_x000D_ Confirmed is open access from EUPMC_x000D_ Added journal title from EUPMC_x000D_ Added issn from EUPMC_x000D_ Added eissn from EUPMC_x000D_ Added grants data from EUPMC_x000D_ Added date of publication from EUPMC_x000D_ Added electronic publication date from EUPMC_x000D_ Checking if XML is available from EUPMC (since 6th March 20…	43566	200	GBP	240		Institutional_ membership discount	240		CC BY		Unknown
Cardiff	Unknown	30826689	10.1016/j.gaitpost.2019.02.028	Correlations Between Patient-Perceived Outcome and Objectively-Measured Biomechanical Change Following Total Knee Replacement	Gait & posture	FALSE	0966-6362, 1879-2219	1879-2219	2019-05-01T00:00:00Z	2019-02-25T00:00:00Z	Elsevier BV	Unknown	cc-by	cc-by	Unknown	Unknown	FALSE	FALSE	FALSE	FALSE	FALSE	FALSE	Added DOI from EUPMC_x000D_ This article is not open access according to EUPMC, but since 6th March 2020 we take this to mean only that the publisher did not indicate to EUPMC that it can be included in their Open Access subset - it may well still be an OA article._x000D_ Added journal title from EUPMC_x000D_ Added issn from EUPMC_x000D_ Added eissn from EUPMC_x000D_ Added grants data from EUPMC_…	43578	Euro 3020.00	EUR	3233.98		None	3233.98		CC BY		FALSE
Cardiff	PMC6391069	30806350	10.7554/eLife.39906	Cerebral autoregulation evidenced by synchronized low frequency oscillations in blood pressure and resting-state fMRI	eLife	TRUE	2050-084X	2050-084X	2019-02-01T00:00:00Z	2019-02-26T00:00:00Z	eLife Sciences Publications, Ltd	not applicable	cc-by	cc-by	epmc_api	epmc_api	TRUE	TRUE	FALSE	TRUE	TRUE	TRUE	Added PMCID from EUPMC_x000D_ Added DOI from EUPMC_x000D_ Confirmed fulltext is in EUPMC_x000D_ Confirmed is open access from EUPMC_x000D_ Added journal title from EUPMC_x000D_ Added issn from EUPMC_x000D_ Added eissn from EUPMC_x000D_ Added grants data from EUPMC_x000D_ Added date of publication from EUPMC_x000D_ Added electronic publication date from EUPMC_x000D_ Checking if XML is available fr…	43578	$2507.50	USD	2395.9		Institutional_ membership discount	2395.9		CC BY		Unknown
Cardiff	PMC6949119	30806336	10.1192/bjp.2019.30	Autism spectrum disorder diagnosis in adults: phenotype and genotype findings from a clinically derived cohort	The British journal of psychiatry : the journal of mental science	FALSE	0007-1250, 1472-1465	1472-1465	2019-02-01T00:00:00Z	2019-02-26T00:00:00Z	Royal College of Psychiatrists	not applicable	cc-by	cc-by	epmc_api	epmc_api	TRUE	TRUE	FALSE	TRUE	TRUE	TRUE	Added PMCID from EUPMC_x000D_ Confirmed fulltext is in EUPMC_x000D_ Confirmed is open access from EUPMC_x000D_ Added journal title from EUPMC_x000D_ Added issn from EUPMC_x000D_ Added eissn from EUPMC_x000D_ Added grants data from EUPMC_x000D_ Added date of publication from EUPMC_x000D_ Added electronic publication date from EUPMC_x000D_ Checking if XML is available from EUPMC (since 6th March 20…	43501	2500	GBP	3000		None	3000		CC BY		Unknown
Cardiff	PMC6371946	30804671	10.2147/IJN.S188193	Anti-inflammatory drug-eluting implant model system to prevent wear particles induced periprosthetic osteolysis	International journal of nanomedicine	TRUE	1176-9114, 1178-2013	1178-2013	2019-01-01T00:00:00Z	2019-02-08T00:00:00Z	Informa UK Limited	not applicable	cc-by	cc-by	epmc_api	epmc_api	TRUE	TRUE	FALSE	TRUE	TRUE	TRUE	Added PMCID from EUPMC_x000D_ Confirmed fulltext is in EUPMC_x000D_ Confirmed is open access from EUPMC_x000D_ Added journal title from EUPMC_x000D_ Added issn from EUPMC_x000D_ Added eissn from EUPMC_x000D_ Added grants data from EUPMC_x000D_ Added date of publication from EUPMC_x000D_ Added electronic publication date from EUPMC_x000D_ Checking if XML is available from EUPMC (since 6th March 20…	43446	1465	GBP	1758		None	1758		CC BY		Unknown
Cardiff	PMC6389944	30804328	10.1038/s41398-019-0440-7	Genetic risk for schizophrenia and developmental delay is associated with shape and microstructure of midline white matter structures	Translational psychiatry	TRUE	2158-3188	2158-3188	2019-02-01T00:00:00Z	2019-02-25T00:00:00Z	Springer Science and Business Media LLC	not applicable	cc-by	cc-by	epmc_api	epmc_api	TRUE	TRUE	FALSE	TRUE	TRUE	TRUE	Added PMCID from EUPMC_x000D_ Confirmed fulltext is in EUPMC_x000D_ Confirmed is open access from EUPMC_x000D_ Added journal title from EUPMC_x000D_ Added issn from EUPMC_x000D_ Added eissn from EUPMC_x000D_ Added grants data from EUPMC_x000D_ Added date of publication from EUPMC_x000D_ Added electronic publication date from EUPMC_x000D_ Checking if XML is available from EUPMC (since 6th March 20…	43531	2520	GBP	3024		None	3024		CC BY		Unknown
Cardiff	PMC6690834	30796307	10.1038/s41375-019-0423-y	Telomere fusions associate with coding sequence and copy number alterations in CLL	Leukemia	FALSE	0887-6924, 1476-5551	1476-5551	2019-08-01T00:00:00Z	2019-02-22T00:00:00Z	Springer Science and Business Media LLC	not applicable	cc-by	cc-by	epmc_api	epmc_api	TRUE	TRUE	FALSE	TRUE	TRUE	TRUE	Added PMCID from EUPMC_x000D_ Confirmed fulltext is in EUPMC_x000D_ Confirmed is open access from EUPMC_x000D_ Added journal title from EUPMC_x000D_ Added issn from EUPMC_x000D_ Added eissn from EUPMC_x000D_ Added grants data from EUPMC_x000D_ Added date of publication from EUPMC_x000D_ Added electronic publication date from EUPMC_x000D_ Checking if XML is available from EUPMC (since 6th March 20…	43531	1788	GBP	2145.6		Institutional_ membership discount	2145.6		CC BY		Unknown
Cardiff	PMC6581090	30787038	10.1136/jech-2018-210840	When and how do Â‘effectiveÂ’ interventions need to be adapted and/or re-evaluated in new contexts? The need for guidance	Journal of epidemiology and community health	FALSE	0143-005X, 1470-2738	1470-2738	2019-06-01T00:00:00Z	2019-02-20T00:00:00Z	BMJ	not applicable	cc-by	cc-by	epmc_api	epmc_api	TRUE	TRUE	FALSE	TRUE	TRUE	TRUE	Added PMCID from EUPMC_x000D_ Confirmed fulltext is in EUPMC_x000D_ Confirmed is open access from EUPMC_x000D_ Added journal title from EUPMC_x000D_ Added issn from EUPMC_x000D_ Added eissn from EUPMC_x000D_ Added grants data from EUPMC_x000D_ Added date of publication from EUPMC_x000D_ Added electronic publication date from EUPMC_x000D_ Checking if XML is available from EUPMC (since 6th March 20…	43531	1950	GBP	2340		None	2340		CC BY		Unknown
Cardiff	PMC6605284	30776473	10.1016/j.bbi.2019.02.011	Microglia Â– mediated immunity partly contributes to the genetic association between AlzheimerÂ’s disease and hippocampal volume	Brain, behavior, and immunity	FALSE	0889-1591, 1090-2139	1090-2139	2019-07-01T00:00:00Z	2019-02-15T00:00:00Z	Elsevier BV	not applicable	cc-by	cc-by	epmc_api	epmc_api	TRUE	TRUE	FALSE	TRUE	TRUE	TRUE	Added PMCID from EUPMC_x000D_ Confirmed fulltext is in EUPMC_x000D_ Confirmed is open access from EUPMC_x000D_ Added journal title from EUPMC_x000D_ Added issn from EUPMC_x000D_ Added eissn from EUPMC_x000D_ Added grants data from EUPMC_x000D_ Added date of publication from EUPMC_x000D_ Added electronic publication date from EUPMC_x000D_ Checking if XML is available from EUPMC (since 6th March 20…	43531	Euro 2590.00	EUR	2758.25		None	2758.25		CC BY		Unknown
Cardiff	PMC6520248	30767844	10.1192/bjp.2018.301	Cognitive performance and functional outcomes of carriers of pathogenic CNVs: Analysis of the UK Biobank	The British journal of psychiatry : the journal of mental science	FALSE	0007-1250, 1472-1465	1472-1465	2019-05-01T00:00:00Z	2019-02-15T00:00:00Z	Royal College of Psychiatrists	not applicable	cc-by	cc-by	epmc_api	epmc_api	TRUE	TRUE	FALSE	TRUE	TRUE	TRUE	Added PMCID from EUPMC_x000D_ Confirmed fulltext is in EUPMC_x000D_ Confirmed is open access from EUPMC_x000D_ Added journal title from EUPMC_x000D_ Added issn from EUPMC_x000D_ Added eissn from EUPMC_x000D_ Added grants data from EUPMC_x000D_ Added date of publication from EUPMC_x000D_ Added electronic publication date from EUPMC_x000D_ Checking if XML is available from EUPMC (since 6th March 20…	43475	2500	GBP	3000		None	3000		CC BY		Unknown
Cardiff	PMC6376029	30765704	10.1038/s41467-019-08599-y	Diversity within the adenovirus fiber knob hypervariable loops influences primary receptor interactions	Nature communications	TRUE	2041-1723	2041-1723	2019-02-01T00:00:00Z	2019-02-14T00:00:00Z	Springer Science and Business Media LLC	not applicable	cc-by	cc-by	epmc_api	epmc_api	TRUE	TRUE	FALSE	TRUE	TRUE	TRUE	Added PMCID from EUPMC_x000D_ Confirmed fulltext is in EUPMC_x000D_ Confirmed is open access from EUPMC_x000D_ Added journal title from EUPMC_x000D_ Added issn from EUPMC_x000D_ Added eissn from EUPMC_x000D_ Added grants data from EUPMC_x000D_ Added date of publication from EUPMC_x000D_ Added electronic publication date from EUPMC_x000D_ Checking if XML is available from EUPMC (since 6th March 20…	43489	3490	GBP	4188		None	4188		CC BY		Unknown
Cardiff	PMC6362858	30761144	10.3389/fimmu.2019.00078	Cytokine-mediated induction and regulation of tissue damage during cytomegalovirus infection	Frontiers in Immunology	TRUE	1664-3224	1664-3224	2019-01-01T00:00:00Z	2019-01-29T00:00:00Z	Frontiers Media SA	not applicable	cc-by	cc-by	epmc_api	epmc_api	TRUE	TRUE	FALSE	TRUE	TRUE	TRUE	Added PMCID from EUPMC_x000D_ Confirmed fulltext is in EUPMC_x000D_ Confirmed is open access from EUPMC_x000D_ Added journal title from EUPMC_x000D_ Added issn from EUPMC_x000D_ Added eissn from EUPMC_x000D_ Added grants data from EUPMC_x000D_ Added date of publication from EUPMC_x000D_ Added electronic publication date from EUPMC_x000D_ Checking if XML is available from EUPMC (since 6th March 20…	43489	$1572.50	USD	1494.89		Institutional_ membership discount	1494.89		CC BY		Unknown
Cardiff	PMC6371518	30744581	10.1186/s12884-018-2156-8	Understanding health behaviour in pregnancy and infant feeding intentions in low-income women from the UK through qualitative visual methods and application to the COM-B (Capability, Opportunity, Motivation - Behaviour) model	BMC pregnancy and childbirth	TRUE	1471-2393	1471-2393	2019-02-01T00:00:00Z	2019-02-12T00:00:00Z	Springer Science and Business Media LLC	not applicable	cc-by	cc-by	epmc_api	epmc_api	TRUE	TRUE	FALSE	TRUE	TRUE	TRUE	Added PMCID from EUPMC_x000D_ Confirmed fulltext is in EUPMC_x000D_ Confirmed is open access from EUPMC_x000D_ Added journal title from EUPMC_x000D_ Added issn from EUPMC_x000D_ Added eissn from EUPMC_x000D_ Added grants data from EUPMC_x000D_ Added date of publication from EUPMC_x000D_ Added electronic publication date from EUPMC_x000D_ Checking if XML is available from EUPMC (since 6th March 20…	43501	1214.5	GBP	1457.4		Institutional_ membership discount	1457.4		CC BY		Unknown
Cardiff	PMC6435101	30735826	10.1016/j.neuroimage.2019.02.007	Sex-specific effects of central adiposity and inflammatory markers on limbic microstructure	NeuroImage	FALSE	1053-8119, 1095-9572	1095-9572	2019-04-01T00:00:00Z	2019-02-05T00:00:00Z	Elsevier BV	not applicable	cc-by	cc-by	epmc_api	epmc_api	TRUE	TRUE	FALSE	TRUE	TRUE	TRUE	Added PMCID from EUPMC_x000D_ Confirmed fulltext is in EUPMC_x000D_ Confirmed is open access from EUPMC_x000D_ Added journal title from EUPMC_x000D_ Added issn from EUPMC_x000D_ Added eissn from EUPMC_x000D_ Added grants data from EUPMC_x000D_ Added date of publication from EUPMC_x000D_ Added electronic publication date from EUPMC_x000D_ Checking if XML is available from EUPMC (since 6th March 20…	43517	Euro 2590.00	EUR	2786.2		None	2786.2		CC BY		Unknown
Cardiff	PMC6556555	30716459	10.1016/j.neuroimage.2019.01.077	Cross-scanner and cross-protocol diffusion MRI data harmonisation: A benchmark database and evaluation of algorithms	NeuroImage	FALSE	1053-8119, 1095-9572	1095-9572	2019-07-01T00:00:00Z	2019-02-01T00:00:00Z	Elsevier BV	not applicable	cc-by	cc-by	epmc_api	epmc_api	TRUE	TRUE	FALSE	TRUE	TRUE	TRUE	Added PMCID from EUPMC_x000D_ Confirmed fulltext is in EUPMC_x000D_ Confirmed is open access from EUPMC_x000D_ Added journal title from EUPMC_x000D_ Added issn from EUPMC_x000D_ Added eissn from EUPMC_x000D_ Added grants data from EUPMC_x000D_ Added date of publication from EUPMC_x000D_ Added electronic publication date from EUPMC_x000D_ Checking if XML is available from EUPMC (since 6th March 20…	43690	2550	GBP	3060		None	3060		CC BY		Unknown
Cardiff	PMC6355929	30705365	10.1038/s41598-018-37658-5	Fornix white matter glia damage causes hippocampal gray matter damage during age-dependent limbic decline.	Scientific reports	TRUE	2045-2322	2045-2322	2019-01-01T00:00:00Z	2019-01-31T00:00:00Z	Springer Science and Business Media LLC	not applicable	cc-by	cc-by	epmc_api	epmc_api	TRUE	TRUE	FALSE	TRUE	TRUE	TRUE	Added PMCID from EUPMC_x000D_ Confirmed fulltext is in EUPMC_x000D_ Confirmed is open access from EUPMC_x000D_ Added journal title from EUPMC_x000D_ Added issn from EUPMC_x000D_ Added eissn from EUPMC_x000D_ Added grants data from EUPMC_x000D_ Added date of publication from EUPMC_x000D_ Added electronic publication date from EUPMC_x000D_ Checking if XML is available from EUPMC (since 6th March 20…	43475	1165	GBP	1398		None	1398		CC BY		Unknown
Cardiff	PMC6347391	30682010	10.1371/journal.pone.0203417	Which osteoarthritic gait features recover following Total Knee Replacement surgery?	PloS one	TRUE	1932-6203	1932-6203	2019-01-01T00:00:00Z	2019-01-25T00:00:00Z	Public Library of Science (PLoS)	not applicable	cc-by	cc-by	epmc_api	epmc_api	TRUE	TRUE	FALSE	TRUE	TRUE	TRUE	Added PMCID from EUPMC_x000D_ Confirmed fulltext is in EUPMC_x000D_ Confirmed is open access from EUPMC_x000D_ Added journal title from EUPMC_x000D_ Added issn from EUPMC_x000D_ Added eissn from EUPMC_x000D_ Added grants data from EUPMC_x000D_ Added date of publication from EUPMC_x000D_ Added electronic publication date from EUPMC_x000D_ Checking if XML is available from EUPMC (since 6th March 20…	43490	$1595.00	USD	1513.16		None	1513.16		CC BY		Unknown
Cardiff	PMC6331021	30680069	10.18632/oncotarget.26499	PARP inhibition prevents escape from a telomere-driven crisis and inhibits cell immortalisation	Oncotarget	FALSE	1949-2553	1949-2553	2018-12-01T00:00:00Z	2018-12-25T00:00:00Z	Impact Journals, LLC	not applicable	cc-by	cc-by	epmc_api	epmc_api	TRUE	TRUE	FALSE	TRUE	TRUE	TRUE	Added PMCID from EUPMC_x000D_ Confirmed fulltext is in EUPMC_x000D_ Confirmed is open access from EUPMC_x000D_ Added journal title from EUPMC_x000D_ Added issn from EUPMC_x000D_ Added eissn from EUPMC_x000D_ Added grants data from EUPMC_x000D_ Added date of publication from EUPMC_x000D_ Added electronic publication date from EUPMC_x000D_ Checking if XML is available from EUPMC (since 6th March 20…	43475	$3400.00	USD	3307.93		None	3307.93		CC BY		Unknown
Cardiff	PMC6345995	30679549	10.1038/s41598-018-36820-3	Polygenic impact of common genetic risk loci for Alzheimer's disease on cerebral blood flow in young individuals	Scientific reports	TRUE	2045-2322	2045-2322	2019-01-01T00:00:00Z	2019-01-24T00:00:00Z	Springer Science and Business Media LLC	not applicable	cc-by	cc-by	epmc_api	epmc_api	TRUE	TRUE	FALSE	TRUE	TRUE	TRUE	Added PMCID from EUPMC_x000D_ Confirmed fulltext is in EUPMC_x000D_ Confirmed is open access from EUPMC_x000D_ Added journal title from EUPMC_x000D_ Added issn from EUPMC_x000D_ Added eissn from EUPMC_x000D_ Added grants data from EUPMC_x000D_ Added date of publication from EUPMC_x000D_ Added electronic publication date from EUPMC_x000D_ Checking if XML is available from EUPMC (since 6th March 20…	43433	1165	GBP	1398		None	1398		CC BY		Unknown
Cardiff	PMC6341088	30664628	10.1038/s41398-018-0339-8	Psychiatric disorders in children with 16p11.2 deletion and duplication.	Translational psychiatry	TRUE	2158-3188	2158-3188	2019-01-01T00:00:00Z	2019-01-16T00:00:00Z	Springer Science and Business Media LLC	not applicable	cc-by	cc-by	epmc_api	epmc_api	TRUE	TRUE	FALSE	TRUE	TRUE	TRUE	Added PMCID from EUPMC_x000D_ Confirmed fulltext is in EUPMC_x000D_ Confirmed is open access from EUPMC_x000D_ Added journal title from EUPMC_x000D_ Added issn from EUPMC_x000D_ Added eissn from EUPMC_x000D_ Added grants data from EUPMC_x000D_ Added date of publication from EUPMC_x000D_ Added electronic publication date from EUPMC_x000D_ Checking if XML is available from EUPMC (since 6th March 20…	43451	2520	GBP	3024		None	3024		CC BY		Unknown
Cardiff	PMC6341103	30664619	10.1038/s41398-018-0338-9	Behavioral training rescues motor deficits in Cyfip1 haploinsufficiency mouse model of Autism Spectrum Disorders	Translational psychiatry	TRUE	2158-3188	2158-3188	2019-01-01T00:00:00Z	2019-01-21T00:00:00Z	Springer Science and Business Media LLC	not applicable	cc-by	cc-by	epmc_api	epmc_api	TRUE	TRUE	FALSE	TRUE	TRUE	TRUE	Added PMCID from EUPMC_x000D_ Confirmed fulltext is in EUPMC_x000D_ Confirmed is open access from EUPMC_x000D_ Added journal title from EUPMC_x000D_ Added issn from EUPMC_x000D_ Added eissn from EUPMC_x000D_ Added grants data from EUPMC_x000D_ Added date of publication from EUPMC_x000D_ Added electronic publication date from EUPMC_x000D_ Checking if XML is available from EUPMC (since 6th March 20…	43475	2520	GBP	3024		None	3024		CC BY		Unknown
Cardiff	PMC6323400	30643788	10.1159/000493917	Regulation of the expression of the psychiatric risk gene Cacna1c during associative learning	Molecular neuropsychiatry	FALSE	2296-9209, 2296-9179	2296-9179	2018-12-01T00:00:00Z	2018-11-07T00:00:00Z	S. Karger AG	cc-by	cc-by	Unknown	publisher_splash_page	Unknown	TRUE	FALSE	FALSE	FALSE	FALSE	FALSE	Added PMCID from EUPMC_x000D_ Confirmed fulltext is in EUPMC_x000D_ This article is not open access according to EUPMC, but since 6th March 2020 we take this to mean only that the publisher did not indicate to EUPMC that it can be included in their Open Access subset - it may well still be an OA article._x000D_ Added journal title from EUPMC_x000D_ Added issn from EUPMC_x000D_ Added eissn from EU…	43615	CHF 3000.00	CHF	2929.69		None	2929.69		CC BY		Unknown
Cardiff	PMC6341181	30635396	10.4049/jimmunol.1701757	IL-33 augments virus-specific memory T cell inflation and potentiates the efficacy of an attenuated cytomegalovirus-based vaccine	Journal of immunology (Baltimore, Md. : 1950)	FALSE	0022-1767, 1550-6606	1550-6606	2019-02-01T00:00:00Z	Unknown	The American Association of Immunologists	not applicable	cc-by	cc-by	epmc_api	epmc_api	TRUE	TRUE	FALSE	TRUE	TRUE	TRUE	Added PMCID from EUPMC_x000D_ Confirmed fulltext is in EUPMC_x000D_ Confirmed is open access from EUPMC_x000D_ Added journal title from EUPMC_x000D_ Added issn from EUPMC_x000D_ Added eissn from EUPMC_x000D_ Added grants data from EUPMC_x000D_ Added date of publication from EUPMC_x000D_ Checking if XML is available from EUPMC (since 6th March 2020 this is always done for any article we have a PMC…	43490	$3000.00	USD	2846.08		None	2846.08		CC BY		Unknown
Cardiff	PMC6618334	30633830	10.1111/ejn.14341	Separate cortical and hippocampal cell populations target the rat nucleus reuniens and mammillary bodies	The European journal of neuroscience	FALSE	0953-816X, 1460-9568	1460-9568	2019-06-01T00:00:00Z	2019-02-21T00:00:00Z	Wiley	not applicable	cc-by	cc-by	epmc_api	epmc_api	TRUE	TRUE	FALSE	TRUE	TRUE	TRUE	Added PMCID from EUPMC_x000D_ Confirmed fulltext is in EUPMC_x000D_ Confirmed is open access from EUPMC_x000D_ Added journal title from EUPMC_x000D_ Added issn from EUPMC_x000D_ Added eissn from EUPMC_x000D_ Added grants data from EUPMC_x000D_ Added date of publication from EUPMC_x000D_ Added electronic publication date from EUPMC_x000D_ Checking if XML is available from EUPMC (since 6th March 20…	43501	2000	GBP	2400		None	2400		CC BY		Unknown
Cardiff	PMC6601079	30630973	10.3324/haematol.2018.202846	LEF-1 drives aberrant ?-catenin nuclear localization in myeloid leukemia cells	Haematologica	TRUE	0390-6078, 1592-8721	1592-8721	2019-07-01T00:00:00Z	2019-01-10T00:00:00Z	Ferrata Storti Foundation (Haematologica)	cc-by-nc	cc-by-nc	cc-by-nc	publisher_splash_page	epmc_api	TRUE	TRUE	FALSE	TRUE	FALSE	FALSE	Added PMCID from EUPMC_x000D_ Confirmed fulltext is in EUPMC_x000D_ Confirmed is open access from EUPMC_x000D_ Added journal title from EUPMC_x000D_ Added issn from EUPMC_x000D_ Added eissn from EUPMC_x000D_ Added grants data from EUPMC_x000D_ Added date of publication from EUPMC_x000D_ Added electronic publication date from EUPMC_x000D_ Checking if XML is available from EUPMC (since 6th March 20…	43690	Euro 1602.00	EUR	1797.31		None	1797.31				Unknown
Cardiff	PMC6305447	30619051	10.3389/fneur.2018.01092	Improving the predictions of computational models of convection-enhanced drug delivery by accounting for diffusion non-Gaussianity	Frontiers in Neurology	TRUE	1664-2295	1664-2295	2018-01-01T00:00:00Z	2018-12-18T00:00:00Z	Frontiers Media SA	not applicable	cc-by	cc-by	epmc_api	epmc_api	TRUE	TRUE	FALSE	TRUE	TRUE	TRUE	Added PMCID from EUPMC_x000D_ Confirmed fulltext is in EUPMC_x000D_ Confirmed is open access from EUPMC_x000D_ Added journal title from EUPMC_x000D_ Added issn from EUPMC_x000D_ Added eissn from EUPMC_x000D_ Added grants data from EUPMC_x000D_ Added date of publication from EUPMC_x000D_ Added electronic publication date from EUPMC_x000D_ Checking if XML is available from EUPMC (since 6th March 20…	43446	$2116.50	USD	2094.85		Institutional_ membership discount	2094.85		CC BY		Unknown
Cardiff	PMC6498787	30606278	10.1017/S0033291718003896	Do natural experiments have an important future in the study of mental disorders?	Psychological medicine	FALSE	0033-2917, 1469-8978	1469-8978	2019-05-01T00:00:00Z	2019-01-04T00:00:00Z	Cambridge University Press (CUP)	not applicable	cc-by	cc-by	epmc_api	epmc_api	TRUE	TRUE	FALSE	TRUE	TRUE	TRUE	Added PMCID from EUPMC_x000D_ Confirmed fulltext is in EUPMC_x000D_ Confirmed is open access from EUPMC_x000D_ Added journal title from EUPMC_x000D_ Added issn from EUPMC_x000D_ Added eissn from EUPMC_x000D_ Added grants data from EUPMC_x000D_ Added date of publication from EUPMC_x000D_ Added electronic publication date from EUPMC_x000D_ Checking if XML is available from EUPMC (since 6th March 20…	43446	1870	GBP	2244		None	2244		CC BY		Unknown
Cardiff	PMC6811834	30597088	10.1093/schbul/sby183	Convergent evidence that ZNF804A is a regulator of pre-mRNA processing and gene expression	Schizophrenia bulletin	FALSE	1787-9965, 1745-1701	1745-1701	2019-10-01T00:00:00Z	Unknown	Oxford University Press (OUP)	not applicable	cc-by	cc-by	epmc_api	epmc_api	TRUE	TRUE	FALSE	TRUE	TRUE	TRUE	Added PMCID from EUPMC_x000D_ Confirmed fulltext is in EUPMC_x000D_ Confirmed is open access from EUPMC_x000D_ Added journal title from EUPMC_x000D_ Added issn from EUPMC_x000D_ Added eissn from EUPMC_x000D_ Added grants data from EUPMC_x000D_ Added date of publication from EUPMC_x000D_ Checking if XML is available from EUPMC (since 6th March 2020 this is always done for any article we have a PMC…	43446	2125	GBP	2550		None	2550		CC BY		Unknown
Cardiff	PMC6411840	30590694	10.1093/nar/gky1279	DNA Ligase 1 is an essential mediator of sister chromatid telomere fusions in G2 cell cycle phase	Nucleic acids research	TRUE	0305-1048, 1362-4962	1362-4962	2019-03-01T00:00:00Z	Unknown	Oxford University Press (OUP)	not applicable	cc-by	cc-by	epmc_api	epmc_api	TRUE	TRUE	FALSE	TRUE	TRUE	TRUE	Added PMCID from EUPMC_x000D_ Confirmed fulltext is in EUPMC_x000D_ Confirmed is open access from EUPMC_x000D_ Added journal title from EUPMC_x000D_ Added issn from EUPMC_x000D_ Added eissn from EUPMC_x000D_ Added grants data from EUPMC_x000D_ Added date of publication from EUPMC_x000D_ Checking if XML is available from EUPMC (since 6th March 2020 this is always done for any article we have a PMC…	43578	2720	GBP	3264		None	3264		CC BY		Unknown
Cardiff	PMC6315108	30590041	10.1016/j.celrep.2018.11.103	Dual mechanisms of LYN Kinase Dysregulation drive aggressive behaviour in breast cancer cells	Cell reports	TRUE	2211-1247	2211-1247	2018-12-01T00:00:00Z	Unknown	Elsevier BV	not applicable	cc-by	cc-by	epmc_api	epmc_api	TRUE	FALSE	FALSE	FALSE	TRUE	FALSE	Added PMCID from EUPMC_x000D_ Confirmed fulltext is in EUPMC_x000D_ This article is not open access according to EUPMC, but since 6th March 2020 we take this to mean only that the publisher did not indicate to EUPMC that it can be included in their Open Access subset - it may well still be an OA article._x000D_ Added journal title from EUPMC_x000D_ Added issn from EUPMC_x000D_ Added eissn from EU…	43446	Euro 4310.00	EUR	4828.24		None	4828.24		CC BY		Unknown
Cardiff	PMC6424871	30583851	10.1016/j.biopsych.2018.11.004	Reciprocal white matter changes associated with copy number variation at 15q11.2 BP1-BP2 - A diffusion tensor imaging study	Biological psychiatry	FALSE	0006-3223, 1873-2402	1873-2402	2019-04-01T00:00:00Z	2018-11-19T00:00:00Z	Elsevier BV	not applicable	cc-by	cc-by	epmc_api	epmc_api	TRUE	TRUE	FALSE	TRUE	TRUE	TRUE	Added PMCID from EUPMC_x000D_ Confirmed fulltext is in EUPMC_x000D_ Confirmed is open access from EUPMC_x000D_ Added journal title from EUPMC_x000D_ Added issn from EUPMC_x000D_ Added eissn from EUPMC_x000D_ Added grants data from EUPMC_x000D_ Added date of publication from EUPMC_x000D_ Added electronic publication date from EUPMC_x000D_ Checking if XML is available from EUPMC (since 6th March 20…	43433	Euro 2850.00	EUR	3148.3		None	3148.3		CC BY		Unknown
Cardiff	PMC6357873	30572184	10.1016/j.neurobiolaging.2018.11.011	Selective reduction of APP-BACE1 activity improves memory via NMDA NR2B receptor-mediated mechanisms in aged PDAPP mice	Neurobiology of aging	FALSE	0197-4580, 1558-1497	1558-1497	2019-03-01T00:00:00Z	2018-11-23T00:00:00Z	Elsevier BV	not applicable	cc-by	cc-by	epmc_api	epmc_api	TRUE	TRUE	FALSE	TRUE	TRUE	TRUE	Added PMCID from EUPMC_x000D_ Confirmed fulltext is in EUPMC_x000D_ Confirmed is open access from EUPMC_x000D_ Added journal title from EUPMC_x000D_ Added issn from EUPMC_x000D_ Added eissn from EUPMC_x000D_ Added grants data from EUPMC_x000D_ Added date of publication from EUPMC_x000D_ Added electronic publication date from EUPMC_x000D_ Checking if XML is available from EUPMC (since 6th March 20…	43475	Euro 2930.00	EUR	3282.61		None	3282.61		CC BY		Unknown
Cardiff	PMC6401438	30567988	10.1128/JVI.02003-18	Interferon-induced Transmembrane Protein 1 restricts replication of virus that enter cells via the plasma membrane	Journal of virology	FALSE	0022-538X, 1098-5514	1098-5514	2019-03-01T00:00:00Z	2019-03-05T00:00:00Z	American Society for Microbiology	not applicable	cc-by	cc-by	epmc_api	epmc_api	TRUE	TRUE	FALSE	TRUE	TRUE	TRUE	Added PMCID from EUPMC_x000D_ Confirmed fulltext is in EUPMC_x000D_ Confirmed is open access from EUPMC_x000D_ Added journal title from EUPMC_x000D_ Added issn from EUPMC_x000D_ Added eissn from EUPMC_x000D_ Added grants data from EUPMC_x000D_ Added date of publication from EUPMC_x000D_ Added electronic publication date from EUPMC_x000D_ Checking if XML is available from EUPMC (since 6th March 20…	43481	$3300.00	USD	3182.51		None	3182.51		CC BY		Unknown
Cardiff	PMC6284865	30559928	10.18632/oncotarget.26335	Lect2 deficiency is characterised by altered cytokine levels and promotion of intestinal tumourigenesis	Oncotarget	FALSE	1949-2553	1949-2553	2018-11-01T00:00:00Z	2018-11-23T00:00:00Z	Impact Journals, LLC	not applicable	cc-by	cc-by	epmc_api	epmc_api	TRUE	TRUE	FALSE	TRUE	TRUE	TRUE	Added PMCID from EUPMC_x000D_ Confirmed fulltext is in EUPMC_x000D_ Confirmed is open access from EUPMC_x000D_ Added journal title from EUPMC_x000D_ Added issn from EUPMC_x000D_ Added eissn from EUPMC_x000D_ Added grants data from EUPMC_x000D_ Added date of publication from EUPMC_x000D_ Added electronic publication date from EUPMC_x000D_ Checking if XML is available from EUPMC (since 6th March 20…	43451	$3400.00	USD	3345.36		None	3345.36		CC BY		Unknown
Cardiff	PMC6280551	30555275	10.1080/02643944.2018.1528624	Student health and well-being in secondary schools: the role of school support staff alongside teaching staff	Pastoral care in education	FALSE	0264-3944, 1468-0122	1468-0122	2018-01-01T00:00:00Z	2018-10-14T00:00:00Z	Informa UK Limited	not applicable	cc-by	cc-by	epmc_api	epmc_api	TRUE	TRUE	FALSE	TRUE	TRUE	TRUE	Added PMCID from EUPMC_x000D_ Confirmed fulltext is in EUPMC_x000D_ Confirmed is open access from EUPMC_x000D_ Added journal title from EUPMC_x000D_ Added issn from EUPMC_x000D_ Added eissn from EUPMC_x000D_ Added grants data from EUPMC_x000D_ Added date of publication from EUPMC_x000D_ Added electronic publication date from EUPMC_x000D_ Checking if XML is available from EUPMC (since 6th March 20…	43390	473.75	GBP	568.5		JiscCollections_Taylor & Francis	568.5		CC BY		Unknown
Cardiff	PMC7043392	30553588	10.1016/j.wombi.2018.11.012	Smoking during pregnancy, stigma and secrets: visual methods exploration in the UK	Women and birth : journal of the Australian College of Midwives	FALSE	1871-5192, 1878-1799	1878-1799	2020-02-01T00:00:00Z	2018-12-12T00:00:00Z	Elsevier BV	not applicable	cc-by	cc-by	epmc_api	epmc_api	TRUE	TRUE	FALSE	TRUE	TRUE	TRUE	Added PMCID from EUPMC_x000D_ Added DOI from EUPMC_x000D_ Confirmed fulltext is in EUPMC_x000D_ Confirmed is open access from EUPMC_x000D_ Added journal title from EUPMC_x000D_ Added issn from EUPMC_x000D_ Added eissn from EUPMC_x000D_ Added grants data from EUPMC_x000D_ Added date of publication from EUPMC_x000D_ Added electronic publication date from EUPMC_x000D_ Checking if XML is available fr…	43446	Euro 1470.00	EUR	1646.75		None	1646.75		CC BY		Unknown
Cardiff	PMC6357872	30550978	10.1016/j.neurobiolaging.2018.11.009	Striking reduction in neurons and glial cells in anterior thalamic nuclei of older patients with DownÂ’s syndrome	Neurobiology of aging	FALSE	0197-4580, 1558-1497	1558-1497	2019-03-01T00:00:00Z	2018-11-17T00:00:00Z	Elsevier BV	not applicable	cc-by	cc-by	epmc_api	epmc_api	TRUE	TRUE	FALSE	TRUE	TRUE	TRUE	Added PMCID from EUPMC_x000D_ Confirmed fulltext is in EUPMC_x000D_ Confirmed is open access from EUPMC_x000D_ Added journal title from EUPMC_x000D_ Added issn from EUPMC_x000D_ Added eissn from EUPMC_x000D_ Added grants data from EUPMC_x000D_ Added date of publication from EUPMC_x000D_ Added electronic publication date from EUPMC_x000D_ Checking if XML is available from EUPMC (since 6th March 20…	43446	Euro 2930.00	EUR	3282.3		None	3282.3		CC BY		Unknown
Cardiff	PMC6258791	30519192	10.3389/fphys.2018.01657	Cerebrovascular Function in the Large Arteries is maintained following Moderate Intensity Exercise	Frontiers in Physiology	TRUE	1664-042X	1664-042X	2018-01-01T00:00:00Z	2018-11-21T00:00:00Z	Frontiers Media SA	not applicable	cc-by	cc-by	epmc_api	epmc_api	TRUE	TRUE	FALSE	TRUE	TRUE	TRUE	Added PMCID from EUPMC_x000D_ Confirmed fulltext is in EUPMC_x000D_ Confirmed is open access from EUPMC_x000D_ Added journal title from EUPMC_x000D_ Added issn from EUPMC_x000D_ Added eissn from EUPMC_x000D_ Added grants data from EUPMC_x000D_ Added date of publication from EUPMC_x000D_ Added electronic publication date from EUPMC_x000D_ Checking if XML is available from EUPMC (since 6th March 20…	43426	$2507.50	USD	2418.23		Institutional_ membership discount	2418.23		CC BY		Unknown
Cardiff	PMC6602524	30507237	10.1037/per0000313	Emotional modulation of the pupil response in psychopathy	Personality disorders	FALSE	1949-2715, 1949-2723	1949-2723	2019-07-01T00:00:00Z	2018-12-03T00:00:00Z	American Psychological Association (APA)	not applicable	cc-by	cc-by	epmc_api	epmc_api	TRUE	FALSE	FALSE	FALSE	TRUE	FALSE	Added PMCID from EUPMC_x000D_ Confirmed fulltext is in EUPMC_x000D_ This article is not open access according to EUPMC, but since 6th March 2020 we take this to mean only that the publisher did not indicate to EUPMC that it can be included in their Open Access subset - it may well still be an OA article._x000D_ Added journal title from EUPMC_x000D_ Added issn from EUPMC_x000D_ Added eissn from EU…	43397	$4000.00	USD	3839.39		None	3839.39		CC BY		Unknown
Cardiff	PMC6618102	30474175	10.1111/ejn.14289	The relationship between the temporal structure of magnetoencephalography recorded brain activity and capacity to form discrete auditory representations	The European journal of neuroscience	FALSE	0953-816X, 1460-9568	1460-9568	2019-06-01T00:00:00Z	2018-12-11T00:00:00Z	Wiley	not applicable	cc-by	cc-by	epmc_api	epmc_api	TRUE	TRUE	FALSE	TRUE	TRUE	TRUE	Added PMCID from EUPMC_x000D_ Confirmed fulltext is in EUPMC_x000D_ Confirmed is open access from EUPMC_x000D_ Added journal title from EUPMC_x000D_ Added issn from EUPMC_x000D_ Added eissn from EUPMC_x000D_ Added grants data from EUPMC_x000D_ Added date of publication from EUPMC_x000D_ Added electronic publication date from EUPMC_x000D_ Checking if XML is available from EUPMC (since 6th March 20…	43433	2000	GBP	2400		None	2400		CC BY		Unknown
Cardiff	PMC6372723	30448545	10.1016/j.jnutbio.2018.10.008	B cell activation and proliferation increase intracellular zinc levels	The Journal of nutritional biochemistry	FALSE	0955-2863, 1873-4847	1873-4847	2019-02-01T00:00:00Z	2018-10-26T00:00:00Z	Elsevier BV	not applicable	cc-by	cc-by	epmc_api	epmc_api	TRUE	TRUE	FALSE	TRUE	TRUE	TRUE	Added PMCID from EUPMC_x000D_ Confirmed fulltext is in EUPMC_x000D_ Confirmed is open access from EUPMC_x000D_ Added journal title from EUPMC_x000D_ Added issn from EUPMC_x000D_ Added eissn from EUPMC_x000D_ Added grants data from EUPMC_x000D_ Added date of publication from EUPMC_x000D_ Added electronic publication date from EUPMC_x000D_ Checking if XML is available from EUPMC (since 6th March 20…	43413	Euro 2827.91	EUR	3051.43		None	3051.43		CC BY		Unknown
Cardiff	PMC6325267	30389839	10.1523/JNEUROSCI.0479-18.2018	The Cognitive Thalamus as a gateway to mental representation	The Journal of neuroscience : the official journal of the Society for Neuroscience	FALSE	0270-6474, 1529-2401	1529-2401	2019-01-01T00:00:00Z	2018-11-02T00:00:00Z	Society for Neuroscience	not applicable	cc-by	cc-by	epmc_api	epmc_api	TRUE	TRUE	FALSE	TRUE	TRUE	TRUE	Added PMCID from EUPMC_x000D_ Confirmed fulltext is in EUPMC_x000D_ Confirmed is open access from EUPMC_x000D_ Added journal title from EUPMC_x000D_ Added issn from EUPMC_x000D_ Added eissn from EUPMC_x000D_ Added grants data from EUPMC_x000D_ Added date of publication from EUPMC_x000D_ Added electronic publication date from EUPMC_x000D_ Checking if XML is available from EUPMC (since 6th March 20…	43433	$2990.00	USD	2905.03		None	2905.03		CC BY		Unknown
Cardiff	PMC6215251	30355783	10.4049/jimmunol.1701556	Structural and functional analyses of the shedding protease ADAM17 in HoxB8-immortalized macrophages and dendritic-like cells	Journal of immunology (Baltimore, Md. : 1950)	FALSE	0022-1767, 1550-6606	1550-6606	2018-11-01T00:00:00Z	2018-10-24T00:00:00Z	The American Association of Immunologists	not applicable	cc-by	cc-by	epmc_api	epmc_api	TRUE	FALSE	FALSE	FALSE	TRUE	FALSE	Added PMCID from EUPMC_x000D_ Confirmed fulltext is in EUPMC_x000D_ This article is not open access according to EUPMC, but since 6th March 2020 we take this to mean only that the publisher did not indicate to EUPMC that it can be included in their Open Access subset - it may well still be an OA article._x000D_ Added journal title from EUPMC_x000D_ Added issn from EUPMC_x000D_ Added eissn from EU…	43418	$3000.00	USD	2870.12		None	2870.12		CC BY		Unknown
Cardiff	PMC6280024	30342199	10.1016/j.neuroscience.2018.10.020	Absence of neuronal response modulation with familiarity in perirhinal cortex	Neuroscience	FALSE	0306-4522, 1873-7544	1873-7544	2018-12-01T00:00:00Z	2018-10-18T00:00:00Z	Elsevier BV	not applicable	cc-by	cc-by	epmc_api	epmc_api	TRUE	TRUE	FALSE	TRUE	TRUE	TRUE	Added PMCID from EUPMC_x000D_ Confirmed fulltext is in EUPMC_x000D_ Confirmed is open access from EUPMC_x000D_ Added journal title from EUPMC_x000D_ Added issn from EUPMC_x000D_ Added eissn from EUPMC_x000D_ Added grants data from EUPMC_x000D_ Added date of publication from EUPMC_x000D_ Added electronic publication date from EUPMC_x000D_ Checking if XML is available from EUPMC (since 6th March 20…	43413	Euro 2120.93	EUR	2288.57		None	2288.57		CC BY		Unknown
Cardiff	PMC6261847	30339963	10.1016/j.neurobiolaging.2018.08.026	Increased posterior default mode network activity and structural connectivity in young adult APOE-?4 carriers: a multi-modal imaging investigation	Neurobiology of aging	FALSE	0197-4580, 1558-1497	1558-1497	2019-01-01T00:00:00Z	2018-09-22T00:00:00Z	Elsevier BV	not applicable	cc-by	cc-by	epmc_api	epmc_api	TRUE	TRUE	FALSE	TRUE	TRUE	TRUE	Added PMCID from EUPMC_x000D_ Confirmed fulltext is in EUPMC_x000D_ Confirmed is open access from EUPMC_x000D_ Added journal title from EUPMC_x000D_ Added issn from EUPMC_x000D_ Added eissn from EUPMC_x000D_ Added grants data from EUPMC_x000D_ Added date of publication from EUPMC_x000D_ Added electronic publication date from EUPMC_x000D_ Checking if XML is available from EUPMC (since 6th March 20…	43383	Euro 3004.65	EUR	3252.37		None	3252.37		CC BY		Unknown
Cardiff	PMC6262789	30337376	10.1242/dev.165936	TWE-PRIL reverse signaling suppresses sympathetic axon growth and tissue innervation	Development (Cambridge, England)	FALSE	0950-1991, 1477-9129	1477-9129	2018-11-01T00:00:00Z	2018-11-19T00:00:00Z	The Company of Biologists	not applicable	cc-by	cc-by	epmc_api	epmc_api	TRUE	TRUE	FALSE	TRUE	TRUE	TRUE	Added PMCID from EUPMC_x000D_ Confirmed fulltext is in EUPMC_x000D_ Confirmed is open access from EUPMC_x000D_ Added journal title from EUPMC_x000D_ Added issn from EUPMC_x000D_ Added eissn from EUPMC_x000D_ Added grants data from EUPMC_x000D_ Added date of publication from EUPMC_x000D_ Added electronic publication date from EUPMC_x000D_ Checking if XML is available from EUPMC (since 6th March 20…	43396	2500	GBP	3000		None	3000		CC BY		Unknown
Cardiff	PMC6174198	30327650	10.3389/fimmu.2018.02214	HCMV-encoded NK modulators: lessons from in vitro and in vivo genetic variation	Frontiers in immunology	TRUE	1664-3224	1664-3224	2018-01-01T00:00:00Z	2018-10-01T00:00:00Z	Frontiers Media SA	not applicable	cc-by	cc-by	epmc_api	epmc_api	TRUE	TRUE	FALSE	TRUE	TRUE	TRUE	Added PMCID from EUPMC_x000D_ Confirmed fulltext is in EUPMC_x000D_ Confirmed is open access from EUPMC_x000D_ Added journal title from EUPMC_x000D_ Added issn from EUPMC_x000D_ Added eissn from EUPMC_x000D_ Added grants data from EUPMC_x000D_ Added date of publication from EUPMC_x000D_ Added electronic publication date from EUPMC_x000D_ Checking if XML is available from EUPMC (since 6th March 20…	43382	$1572.50	USD	1493.11		Institutional_ membership discount	1493.11		CC BY		Unknown
Cardiff	PMC6320390	30304702	10.1016/j.bbr.2018.10.012	Do the rat anterior thalamic nuclei contribute to behavioural flexibility?	Behavioural brain research	FALSE	0166-4328, 1872-7549	1872-7549	2019-02-01T00:00:00Z	2018-10-07T00:00:00Z	Elsevier BV	not applicable	cc-by	cc-by	epmc_api	epmc_api	TRUE	TRUE	FALSE	TRUE	TRUE	TRUE	Added PMCID from EUPMC_x000D_ Confirmed fulltext is in EUPMC_x000D_ Confirmed is open access from EUPMC_x000D_ Added journal title from EUPMC_x000D_ Added issn from EUPMC_x000D_ Added eissn from EUPMC_x000D_ Added grants data from EUPMC_x000D_ Added date of publication from EUPMC_x000D_ Added electronic publication date from EUPMC_x000D_ Checking if XML is available from EUPMC (since 6th March 20…	43396	Euro 2430.23	EUR	2655.27		None	2655.27		CC BY		Unknown
Cardiff	PMC6264385	30278214	10.1016/j.neuroimage.2018.09.035	Dual-calibrated fMRI measurement of absolute cerebral metabolic rate of oxygen consumption and effective oxygen diffusivity	NeuroImage	FALSE	1053-8119, 1095-9572	1095-9572	2019-01-01T00:00:00Z	2018-09-29T00:00:00Z	Elsevier BV	not applicable	cc-by	cc-by	epmc_api	epmc_api	TRUE	TRUE	FALSE	TRUE	TRUE	TRUE	Added PMCID from EUPMC_x000D_ Confirmed fulltext is in EUPMC_x000D_ Confirmed is open access from EUPMC_x000D_ Added journal title from EUPMC_x000D_ Added issn from EUPMC_x000D_ Added eissn from EUPMC_x000D_ Added grants data from EUPMC_x000D_ Added date of publication from EUPMC_x000D_ Added electronic publication date from EUPMC_x000D_ Checking if XML is available from EUPMC (since 6th March 20…	43390	Euro 2651.16	EUR	2891.65		None	2891.65		CC BY		Unknown
Cardiff	PMC6790970	29573009	10.1002/mrm.27181	A diffusion model-free framework with echo time dependence for free-water elimination and brain tissue microstructure characterization	Magnetic resonance in medicine	FALSE	0740-3194, 1522-2594	1522-2594	2018-11-01T00:00:00Z	2018-03-23T00:00:00Z	Wiley	not applicable	cc-by	cc-by	epmc_api	epmc_api	TRUE	TRUE	FALSE	TRUE	TRUE	TRUE	Added PMCID from EUPMC_x000D_ Confirmed fulltext is in EUPMC_x000D_ Confirmed is open access from EUPMC_x000D_ Added journal title from EUPMC_x000D_ Added issn from EUPMC_x000D_ Added eissn from EUPMC_x000D_ Added grants data from EUPMC_x000D_ Added date of publication from EUPMC_x000D_ Added electronic publication date from EUPMC_x000D_ Checking if XML is available from EUPMC (since 6th March 20…	43720	2500	GBP	3000		None	3000		CC BY		Unknown
Dundee	PMC6830221	31709057	10.1107/S205225251901114X	Engineering a surrogate human heteromeric ?/? glycine receptor orthosteric site exploiting the structural homology and stability of acetylcholine-binding protein	IUCrJ	FALSE	2052-2525	Unknown	Unknown	Unknown	International Union of Crystallography (IUCr)	not applicable	cc-by	cc-by	epmc_xml_permissions	epmc_xml_permissions	FALSE	TRUE	FALSE	FALSE	FALSE	FALSE	Added PMCID from EUPMC_x000D_ This article is not open access according to EUPMC, but since 6th March 2020 we take this to mean only that the publisher did not indicate to EUPMC that it can be included in their Open Access subset - it may well still be an OA article._x000D_ Checking if XML is available from EUPMC (since 6th March 2020 this is always done for any article we have a PMCID for, regar…	43531			3170.31		None	3170.31		CC BY		FALSE
Dundee	Unknown	31566633	10.1039/c9an00771g	Profiling embryonic stem cell differentiation by MALDI TOF mass spectrometry: development of a reproducible and robust sample preparation workflow	The Analyst	FALSE	0003-2654	Unknown	Unknown	Unknown	Royal Society of Chemistry (RSC)	cc-by	cc-by	Unknown	publisher_splash_page	Unknown	FALSE	FALSE	FALSE	FALSE	FALSE	FALSE	This article is not open access according to EUPMC, but since 6th March 2020 we take this to mean only that the publisher did not indicate to EUPMC that it can be included in their Open Access subset - it may well still be an OA article._x000D_ Could not find licence via EUPMC_x000D_ Added publisher name from Crossref_x000D_ Added ISSN from Crossref_x000D_ Added journal title from Crossref_x000D_…	43578			1500		Institutional_ membership discount	1500		CC BY		FALSE
Dundee	PMC6899518	31509741	10.1016/j.celrep.2019.08.026	In vitro reconstitution defines the minimal requirements for Cdc48-dependent disassembly of the CMG helicase in budding yeast	Cell Reports	FALSE	2211-1247	Unknown	Unknown	Unknown	Elsevier BV	Unknown	cc-by	Unknown	Unknown	Unknown	FALSE	FALSE	FALSE	FALSE	FALSE	FALSE	Added PMCID from EUPMC_x000D_ This article is not open access according to EUPMC, but since 6th March 2020 we take this to mean only that the publisher did not indicate to EUPMC that it can be included in their Open Access subset - it may well still be an OA article._x000D_ Checking if XML is available from EUPMC (since 6th March 2020 this is always done for any article we have a PMCID for, regar…	43703			3641.64		None	3641.64		CC BY		FALSE
Dundee	Unknown	31433993	10.1016/j.celrep.2019.07.067	PP1 and PP2A use opposite phospho-dependencies to control distinct processes at the kinetochore	Cell Reports	FALSE	2211-1247	Unknown	Unknown	Unknown	Elsevier BV	Unknown	cc-by	Unknown	Unknown	Unknown	FALSE	FALSE	FALSE	FALSE	FALSE	FALSE	Unable to locate article in EPMC._x000D_ Added publisher name from Crossref_x000D_ Added ISSN from Crossref_x000D_ Added journal title from Crossref_x000D_ Found DOI in CORE_x000D_ Searched OpenDOAR but could not find repo and/or URL_x000D_ Added repositories that CORE claims article is available from_x000D_ Could not find DOI in BASE_x000D_ Not attempting Grist API grant lookups since no grants …	43601			2615.06		None	1307.53		CC BY		FALSE
Dundee	Unknown	31332098	10.1074/mcp.RA119.001472	Multi-batch TMT reveals false positives, batch effects and missing values	Molecular & Cellular Proteomics	FALSE	1535-9476	Unknown	Unknown	Unknown	American Society for Biochemistry & Molecular Biology (ASBMB)	cc-by	cc-by	Unknown	publisher_splash_page	Unknown	FALSE	FALSE	FALSE	FALSE	FALSE	FALSE	Unable to locate article in EPMC._x000D_ Added publisher name from Crossref_x000D_ Added ISSN from Crossref_x000D_ Added journal title from Crossref_x000D_ Found DOI in CORE_x000D_ Searched OpenDOAR but could not find repo and/or URL_x000D_ Added repositories that CORE claims article is available from_x000D_ Could not find DOI in BASE_x000D_ Not attempting Grist API grant lookups since no grants …	43425			2419.45		None	2419.45		CC BY		FALSE
Dundee	PMC6709497	31307977	10.1128/AAC.00309-19	Identification of novel Trypanosoma cruzi proteasome inhibitors using a luminescence-based high-throughput screening assay	Antimicrobial Agents and Chemotherapy	FALSE	0066-4804	Unknown	Unknown	Unknown	American Society for Microbiology	not applicable	cc-by	cc-by	epmc_xml_permissions	epmc_xml_permissions	FALSE	TRUE	FALSE	FALSE	FALSE	FALSE	Added PMCID from EUPMC_x000D_ This article is not open access according to EUPMC, but since 6th March 2020 we take this to mean only that the publisher did not indicate to EUPMC that it can be included in their Open Access subset - it may well still be an OA article._x000D_ Checking if XML is available from EUPMC (since 6th March 2020 this is always done for any article we have a PMCID for, regar…	43623			4188		None	2094		CC BY		FALSE
Dundee	PMC6617441	31289266	10.1038/s41467-019-10823-8	Monoallelic expression and epigenetic inheritance sustained by a Trypanosoma brucei variant surface glycoprotein exclusion complex	Nature Communications	FALSE	2041-1723	Unknown	Unknown	Unknown	Springer Science and Business Media LLC	not applicable	cc-by	cc-by	epmc_xml_permissions	epmc_xml_permissions	FALSE	TRUE	FALSE	FALSE	FALSE	FALSE	Added PMCID from EUPMC_x000D_ This article is not open access according to EUPMC, but since 6th March 2020 we take this to mean only that the publisher did not indicate to EUPMC that it can be included in their Open Access subset - it may well still be an OA article._x000D_ Checking if XML is available from EUPMC (since 6th March 2020 this is always done for any article we have a PMCID for, regar…	43626			1843.57		None	1843.57		CC BY		FALSE
Dundee	PMC6747728	31289179	10.1128/mBio.01252-19	Persistent DNA Damage Foci and DNA Replication with a Broken Chromosome in the African Trypanosome	mBio	FALSE	2150-7511	Unknown	Unknown	Unknown	American Society for Microbiology	not applicable	cc-by	cc-by	epmc_xml_permissions	epmc_xml_permissions	FALSE	TRUE	FALSE	FALSE	FALSE	FALSE	Added PMCID from EUPMC_x000D_ This article is not open access according to EUPMC, but since 6th March 2020 we take this to mean only that the publisher did not indicate to EUPMC that it can be included in their Open Access subset - it may well still be an OA article._x000D_ Checking if XML is available from EUPMC (since 6th March 2020 this is always done for any article we have a PMCID for, regar…	43585			1174.31		None	1174.31		CC BY		FALSE
Dundee	PMC6855336	31268872	10.1097/HJH.0000000000002189	Allopurinol treatment adversely impacts LV mass regression in Patients with well-controlled Hypertension	Journal of Hypertension	FALSE	0263-6352	Unknown	Unknown	Unknown	Ovid Technologies (Wolters Kluwer Health)	not applicable	cc-by	cc-by	epmc_xml_permissions	epmc_xml_permissions	FALSE	TRUE	FALSE	FALSE	FALSE	FALSE	Added PMCID from EUPMC_x000D_ This article is not open access according to EUPMC, but since 6th March 2020 we take this to mean only that the publisher did not indicate to EUPMC that it can be included in their Open Access subset - it may well still be an OA article._x000D_ Checking if XML is available from EUPMC (since 6th March 2020 this is always done for any article we have a PMCID for, regar…	43635			2778.35		Author_Supporter/Membership Discount	2778.35		CC BY		FALSE
Dundee	PMC6607002	31267714	10.15252/embr.201846436	CDK1 and CDK2 regulate NICD1 turnover and the periodicity of the segmentation clock	EMBO reports	FALSE	1469-221X	Unknown	Unknown	Unknown	EMBO	not applicable	cc-by	cc-by	epmc_xml_permissions	epmc_xml_permissions	FALSE	TRUE	FALSE	FALSE	FALSE	FALSE	Added PMCID from EUPMC_x000D_ This article is not open access according to EUPMC, but since 6th March 2020 we take this to mean only that the publisher did not indicate to EUPMC that it can be included in their Open Access subset - it may well still be an OA article._x000D_ Checking if XML is available from EUPMC (since 6th March 2020 this is always done for any article we have a PMCID for, regar…	43584			1992.02		ACS_AuthorChoice membership discount	1992.02		CC BY		FALSE
Dundee	Unknown	31264963	10.7554/eLife.46902	Contractile acto-myosin network on nuclear envelope remnants positions human chromosomes for mitosis	eLife	FALSE	2050-084X	Unknown	Unknown	Unknown	eLife Sciences Publications, Ltd	cc-by	cc-by	Unknown	publisher_splash_page	Unknown	FALSE	FALSE	FALSE	FALSE	FALSE	FALSE	Unable to locate article in EPMC._x000D_ Added publisher name from Crossref_x000D_ Added ISSN from Crossref_x000D_ Added journal title from Crossref_x000D_ Found DOI in CORE_x000D_ Searched OpenDOAR but could not find repo and/or URL_x000D_ Added repositories that CORE claims article is available from_x000D_ Could not find DOI in BASE_x000D_ Not attempting Grist API grant lookups since no grants …	43636			591.25		JiscCollections_Taylor & Francis	591.25		CC BY		FALSE
Dundee	PMC6760625	31243346	10.1038/s41429-019-0202-z	Pyrazinamide may possess cardioprotective properties	The Journal of Antibiotics	FALSE	0021-8820	Unknown	Unknown	Unknown	Springer Science and Business Media LLC	not applicable	cc-by	cc-by	epmc_xml_permissions	epmc_xml_permissions	FALSE	TRUE	FALSE	FALSE	FALSE	FALSE	Added PMCID from EUPMC_x000D_ This article is not open access according to EUPMC, but since 6th March 2020 we take this to mean only that the publisher did not indicate to EUPMC that it can be included in their Open Access subset - it may well still be an OA article._x000D_ Checking if XML is available from EUPMC (since 6th March 2020 this is always done for any article we have a PMCID for, regar…	43511			459.35		Author_Supporter/Membership Discount	0		CC BY		FALSE
Dundee	PMC6779385	31234702	10.1080/15476286.2019.1630797	Effect of methylation of adenine N6 on kink turn structure depends on location	RNA Biology	FALSE	1547-6286	Unknown	Unknown	Unknown	Informa UK Limited	not applicable	cc-by	cc-by	epmc_xml_permissions	epmc_xml_permissions	FALSE	TRUE	FALSE	FALSE	FALSE	FALSE	Added PMCID from EUPMC_x000D_ This article is not open access according to EUPMC, but since 6th March 2020 we take this to mean only that the publisher did not indicate to EUPMC that it can be included in their Open Access subset - it may well still be an OA article._x000D_ Checking if XML is available from EUPMC (since 6th March 2020 this is always done for any article we have a PMCID for, regar…	43482			2185.16		None	2185.16		CC BY		FALSE
Dundee	PMC6613138	31217292	10.1073/pnas.1903982116	Pulcherrimin formation controls growth arrest of the Bacillus subtilis biofilm	Proceedings of the National Academy of Sciences	FALSE	0027-8424	Unknown	Unknown	Unknown	Proceedings of the National Academy of Sciences	not applicable	cc-by	cc-by	epmc_xml_permissions	epmc_xml_permissions	FALSE	TRUE	FALSE	FALSE	FALSE	FALSE	Added PMCID from EUPMC_x000D_ This article is not open access according to EUPMC, but since 6th March 2020 we take this to mean only that the publisher did not indicate to EUPMC that it can be included in their Open Access subset - it may well still be an OA article._x000D_ Checking if XML is available from EUPMC (since 6th March 2020 this is always done for any article we have a PMCID for, regar…	43684			2604		None	2604		CC BY		FALSE
Dundee	PMC6544269	31150492	10.1371/journal.pone.0217828	Identification of inhibitors of an unconventional Trypanosoma brucei kinetochore kinase	PLOS ONE	FALSE	1932-6203	Unknown	Unknown	Unknown	Public Library of Science (PLoS)	not applicable	cc-by	cc-by	epmc_xml_permissions	epmc_xml_permissions	FALSE	TRUE	FALSE	FALSE	FALSE	FALSE	Added PMCID from EUPMC_x000D_ This article is not open access according to EUPMC, but since 6th March 2020 we take this to mean only that the publisher did not indicate to EUPMC that it can be included in their Open Access subset - it may well still be an OA article._x000D_ Checking if XML is available from EUPMC (since 6th March 2020 this is always done for any article we have a PMCID for, regar…	43580			3694.62		None	3694.62		CC BY		FALSE
Dundee	PMC6657216	31147315	10.1124/dmd.119.087718	Defining the Contribution of CYP1A1 and CYP1A2 to Drug Metabolism Using Humanized CYP1A1/1A2 and Cyp1a1/Cyp1a2 Knockout Mice	Drug Metabolism and Disposition	FALSE	0090-9556	Unknown	Unknown	Unknown	American Society for Pharmacology & Experimental Therapeutics (ASPET)	not applicable	cc-by	cc-by	epmc_xml_permissions	epmc_xml_permissions	FALSE	TRUE	FALSE	FALSE	FALSE	FALSE	Added PMCID from EUPMC_x000D_ This article is not open access according to EUPMC, but since 6th March 2020 we take this to mean only that the publisher did not indicate to EUPMC that it can be included in their Open Access subset - it may well still be an OA article._x000D_ Checking if XML is available from EUPMC (since 6th March 2020 this is always done for any article we have a PMCID for, regar…	43612			2388.19		None	2388.19		CC BY		FALSE
Dundee	PMC6648352	31127277	10.1093/nar/gkz455	A post-transcriptional respiratome regulon in trypanosomes	Nucleic Acids Research	FALSE	0305-1048	Unknown	Unknown	Unknown	Oxford University Press (OUP)	not applicable	cc-by	cc-by	epmc_xml_permissions	epmc_xml_permissions	FALSE	TRUE	FALSE	FALSE	FALSE	FALSE	Added PMCID from EUPMC_x000D_ This article is not open access according to EUPMC, but since 6th March 2020 we take this to mean only that the publisher did not indicate to EUPMC that it can be included in their Open Access subset - it may well still be an OA article._x000D_ Checking if XML is available from EUPMC (since 6th March 2020 this is always done for any article we have a PMCID for, regar…	43626			1789.2		None	894.6		CC BY		FALSE
Dundee	PMC6599887	31125568	10.1016/j.jmb.2019.05.025	Exploration of the TRIM fold of MuRF1 using EPR reveals a canonical antiparallel structure and extended COS-box	Journal of Molecular Biology	FALSE	0022-2836	Unknown	Unknown	Unknown	Elsevier BV	not applicable	cc-by	cc-by	epmc_xml_permissions	epmc_xml_permissions	FALSE	TRUE	FALSE	FALSE	FALSE	FALSE	Added PMCID from EUPMC_x000D_ This article is not open access according to EUPMC, but since 6th March 2020 we take this to mean only that the publisher did not indicate to EUPMC that it can be included in their Open Access subset - it may well still be an OA article._x000D_ Checking if XML is available from EUPMC (since 6th March 2020 this is always done for any article we have a PMCID for, regar…	43609			1298.45		None	1298.45		CC BY		FALSE
Dundee	PMC6480136	31057189	10.1016/j.tetlet.2019.03.068	Optimisation of a Key Cross-Coupling Reaction Towards the Synthesis of a Promising Antileishmanial Compound	Tetrahedron Letters	FALSE	0040-4039	Unknown	Unknown	Unknown	Elsevier BV	Unknown	cc-by	Unknown	Unknown	Unknown	FALSE	FALSE	FALSE	FALSE	FALSE	FALSE	Added PMCID from EUPMC_x000D_ This article is not open access according to EUPMC, but since 6th March 2020 we take this to mean only that the publisher did not indicate to EUPMC that it can be included in their Open Access subset - it may well still be an OA article._x000D_ Checking if XML is available from EUPMC (since 6th March 2020 this is always done for any article we have a PMCID for, regar…	43479			1409.6		None	1409.6		CC BY		FALSE
Dundee	PMC6598861	31051160	10.1016/j.ydbio.2019.04.017	Cyclic AMP induction of Dictyostelium prespore gene expression requires autophagy	Developmental Biology	FALSE	0012-1606	Unknown	Unknown	Unknown	Elsevier BV	not applicable	cc-by	cc-by	epmc_xml_permissions	epmc_xml_permissions	FALSE	TRUE	FALSE	FALSE	FALSE	FALSE	Added PMCID from EUPMC_x000D_ This article is not open access according to EUPMC, but since 6th March 2020 we take this to mean only that the publisher did not indicate to EUPMC that it can be included in their Open Access subset - it may well still be an OA article._x000D_ Checking if XML is available from EUPMC (since 6th March 2020 this is always done for any article we have a PMCID for, regar…	43700			1788.23		None	1788.23		CC BY		FALSE
Dundee	PMC6523996	31017785	10.1021/jacs.9b02141	Comparison of the structures and mechanisms of the pistol and hammerhead ribozymes	Journal of the American Chemical Society	FALSE	0002-7863	Unknown	Unknown	Unknown	American Chemical Society (ACS)	not applicable	cc-by	cc-by	epmc_xml_permissions	epmc_xml_permissions	FALSE	TRUE	FALSE	FALSE	FALSE	FALSE	Added PMCID from EUPMC_x000D_ This article is not open access according to EUPMC, but since 6th March 2020 we take this to mean only that the publisher did not indicate to EUPMC that it can be included in their Open Access subset - it may well still be an OA article._x000D_ Checking if XML is available from EUPMC (since 6th March 2020 this is always done for any article we have a PMCID for, regar…	43521			3107.39		ACS_AuthorChoice Institutional membership discount	3107.39		CC BY		FALSE
Dundee	PMC6509284	31006569	10.1016/j.cub.2019.03.051	Aurora BÂ–INCENP localization at centromeres/inner kinetochores is required for chromosome bi-orientation in budding yeast	Current Biology	FALSE	0960-9822	Unknown	Unknown	Unknown	Elsevier BV	Unknown	cc-by	Unknown	Unknown	Unknown	FALSE	FALSE	FALSE	FALSE	FALSE	FALSE	Added PMCID from EUPMC_x000D_ This article is not open access according to EUPMC, but since 6th March 2020 we take this to mean only that the publisher did not indicate to EUPMC that it can be included in their Open Access subset - it may well still be an OA article._x000D_ Checking if XML is available from EUPMC (since 6th March 2020 this is always done for any article we have a PMCID for, regar…	43557			5040		None	5040		CC BY		FALSE
Dundee	PMC6484776	30995468	10.1016/j.celrep.2019.03.067	Phenformin, but not metformin, delays development of T-cell acute lymphoblastic leukemia/lymphoma via cell-autonomous AMPK activation	Cell Reports	FALSE	2211-1247	Unknown	Unknown	Unknown	Elsevier BV	Unknown	cc-by	Unknown	Unknown	Unknown	FALSE	FALSE	FALSE	FALSE	FALSE	FALSE	Added PMCID from EUPMC_x000D_ This article is not open access according to EUPMC, but since 6th March 2020 we take this to mean only that the publisher did not indicate to EUPMC that it can be included in their Open Access subset - it may well still be an OA article._x000D_ Checking if XML is available from EUPMC (since 6th March 2020 this is always done for any article we have a PMCID for, regar…				1781.71		None	1781.71		CC BY		FALSE
Dundee	PMC6538824	30975501	10.1016/j.bmc.2019.04.002	Characterising Covalent Warhead Reactivity	Bioorganic & Medicinal Chemistry	FALSE	0968-0896	Unknown	Unknown	Unknown	Elsevier BV	not applicable	cc-by	cc-by	epmc_xml_permissions	epmc_xml_permissions	FALSE	TRUE	FALSE	FALSE	FALSE	FALSE	Added PMCID from EUPMC_x000D_ This article is not open access according to EUPMC, but since 6th March 2020 we take this to mean only that the publisher did not indicate to EUPMC that it can be included in their Open Access subset - it may well still be an OA article._x000D_ Checking if XML is available from EUPMC (since 6th March 2020 this is always done for any article we have a PMCID for, regar…	43615			2459.34		None	1229.67		CC BY		FALSE
Dundee	Unknown	30974199	10.1016/j.gene.2019.04.007	Molecular and bioinformatics analyses reveal two differentially expressed intracellular GH1 ?-glucosidases from the rare alkalophilic fungus Stachybotrys microspora	Gene	FALSE	0378-1119	Unknown	Unknown	Unknown	Elsevier BV	Unknown	cc-by	Unknown	Unknown	Unknown	FALSE	FALSE	FALSE	FALSE	FALSE	FALSE	Unable to locate article in EPMC._x000D_ Added publisher name from Crossref_x000D_ Added ISSN from Crossref_x000D_ Added journal title from Crossref_x000D_ Found DOI in CORE_x000D_ Searched OpenDOAR but could not find repo and/or URL_x000D_ Added repositories that CORE claims article is available from_x000D_ Could not find DOI in BASE_x000D_ Not attempting Grist API grant lookups since no grants …	43678			4896		None	4896		CC BY		FALSE
Dundee	PMC6511062	30962368	10.1073/pnas.1820175116	Preclinical candidate for the treatment of visceral leishmaniasis that acts through proteasome inhibition	Proceedings of the National Academy of Sciences	FALSE	0027-8424	Unknown	Unknown	Unknown	Proceedings of the National Academy of Sciences	not applicable	cc-by	cc-by	epmc_xml_permissions	epmc_xml_permissions	FALSE	TRUE	FALSE	FALSE	FALSE	FALSE	Added PMCID from EUPMC_x000D_ This article is not open access according to EUPMC, but since 6th March 2020 we take this to mean only that the publisher did not indicate to EUPMC that it can be included in their Open Access subset - it may well still be an OA article._x000D_ Checking if XML is available from EUPMC (since 6th March 2020 this is always done for any article we have a PMCID for, regar…	43661			4099.31		None	4099.31		CC BY		FALSE
Dundee	Unknown	30916644	10.7554/eLife.44210	Antigen receptor control of methionine metabolism in T cells	eLife	FALSE	2050-084X	Unknown	Unknown	Unknown	eLife Sciences Publications, Ltd	cc-by	cc-by	Unknown	publisher_splash_page	Unknown	FALSE	FALSE	FALSE	FALSE	FALSE	FALSE	Unable to locate article in EPMC._x000D_ Added publisher name from Crossref_x000D_ Added ISSN from Crossref_x000D_ Added journal title from Crossref_x000D_ Found DOI in CORE_x000D_ Searched OpenDOAR but could not find repo and/or URL_x000D_ Added repositories that CORE claims article is available from_x000D_ Could not find DOI in BASE_x000D_ Not attempting Grist API grant lookups since no grants …	43552			4657.8		None	4657.8		CC BY		FALSE
Dundee	Unknown	30910785	10.1124/dmd.119.086397	An extensively humanised mouse model to predict pathways of drug disposition, drug/drug interactions, and to facilitate the design of clinical trials	Drug Metabolism and Disposition	FALSE	0090-9556	Unknown	Unknown	Unknown	American Society for Pharmacology & Experimental Therapeutics (ASPET)	cc-by	cc-by	Unknown	publisher_splash_page	Unknown	FALSE	FALSE	FALSE	FALSE	FALSE	FALSE	Unable to locate article in EPMC._x000D_ Added publisher name from Crossref_x000D_ Added ISSN from Crossref_x000D_ Added journal title from Crossref_x000D_ Found DOI in CORE_x000D_ Searched OpenDOAR but could not find repo and/or URL_x000D_ Added repositories that CORE claims article is available from_x000D_ Could not find DOI in BASE_x000D_ Not attempting Grist API grant lookups since no grants …	43530			2363.54		None	2363.54		CC BY		FALSE
Dundee	PMC6505380	30910785	10.1124/dmd.119.086397	An Extensively Humanized Mouse Model to Predict Pathways of Drug Disposition and Drug/Drug Interactions, and to Facilitate Design of Clinical Trials	Drug Metabolism and Disposition	FALSE	0090-9556	Unknown	Unknown	Unknown	American Society for Pharmacology & Experimental Therapeutics (ASPET)	not applicable	cc-by	cc-by	epmc_xml_permissions	epmc_xml_permissions	FALSE	TRUE	FALSE	FALSE	FALSE	FALSE	Added PMCID from EUPMC_x000D_ Added PMID from EUPMC_x000D_ Added DOI from EUPMC_x000D_ This article is not open access according to EUPMC, but since 6th March 2020 we take this to mean only that the publisher did not indicate to EUPMC that it can be included in their Open Access subset - it may well still be an OA article._x000D_ Checking if XML is available from EUPMC (since 6th March 2020 this …	43553			2357.47	5	None	2362.47		CC BY		FALSE
Dundee	PMC6421539	30891137	10.1021/acsmedchemlett.8b00616	Discovery of Soft-Drug Topical Tool Modulators of Sphingosine-1-phosphate Receptor 1 (S1PR1)	ACS Medicinal Chemistry Letters	FALSE	1948-5875	Unknown	Unknown	Unknown	American Chemical Society (ACS)	not applicable	cc-by	cc-by	epmc_xml_permissions	epmc_xml_permissions	FALSE	TRUE	FALSE	FALSE	FALSE	FALSE	Added PMCID from EUPMC_x000D_ This article is not open access according to EUPMC, but since 6th March 2020 we take this to mean only that the publisher did not indicate to EUPMC that it can be included in their Open Access subset - it may well still be an OA article._x000D_ Checking if XML is available from EUPMC (since 6th March 2020 this is always done for any article we have a PMCID for, regar…	43451			1893.76		None	1893.76		CC BY		FALSE
Dundee	PMC6504890	30858191	10.1083/jcb.201807125	Live imaging of marked chromosome regions reveals their dynamic resolution and compaction in mitosis	The Journal of Cell Biology	FALSE	0021-9525	Unknown	Unknown	Unknown	Rockefeller University Press	not applicable	cc-by	cc-by	epmc_xml_permissions	epmc_xml_permissions	FALSE	TRUE	FALSE	FALSE	FALSE	FALSE	Added PMCID from EUPMC_x000D_ This article is not open access according to EUPMC, but since 6th March 2020 we take this to mean only that the publisher did not indicate to EUPMC that it can be included in their Open Access subset - it may well still be an OA article._x000D_ Checking if XML is available from EUPMC (since 6th March 2020 this is always done for any article we have a PMCID for, regar…	43406			1581.38		Author_Supporter/Membership Discount	1581.38		CC BY		FALSE
Dundee	PMC6477153	30850330	10.1016/j.molcel.2019.01.040	Pif1-family helicases support fork convergence during DNA replication termination in eukaryotes	Molecular Cell	FALSE	1097-2765	Unknown	Unknown	Unknown	Elsevier BV	Unknown	cc-by	Unknown	Unknown	Unknown	FALSE	FALSE	FALSE	FALSE	FALSE	FALSE	Added PMCID from EUPMC_x000D_ This article is not open access according to EUPMC, but since 6th March 2020 we take this to mean only that the publisher did not indicate to EUPMC that it can be included in their Open Access subset - it may well still be an OA article._x000D_ Checking if XML is available from EUPMC (since 6th March 2020 this is always done for any article we have a PMCID for, regar…	43691			2400		None	2400		CC BY		FALSE
Dundee	PMC6398977	30829571	10.7554/eLife.42619	Division of labour between PP2A-B56 isoforms at the centromere and kinetochore	eLife	FALSE	2050-084X	Unknown	Unknown	Unknown	eLife Sciences Publications, Ltd	not applicable	cc-by	cc-by	epmc_xml_permissions	epmc_xml_permissions	FALSE	TRUE	FALSE	FALSE	FALSE	FALSE	Added PMCID from EUPMC_x000D_ Added DOI from EUPMC_x000D_ This article is not open access according to EUPMC, but since 6th March 2020 we take this to mean only that the publisher did not indicate to EUPMC that it can be included in their Open Access subset - it may well still be an OA article._x000D_ Checking if XML is available from EUPMC (since 6th March 2020 this is always done for any articl…	43438			1398		None	1398		CC BY		FALSE
Dundee	Unknown	30826187	10.1016/j.bmc.2019.02.048	Cereblon versus VHL:Â Hijacking E3 ligases against each other using PROTACs	Bioorganic & Medicinal Chemistry	FALSE	0968-0896	Unknown	Unknown	Unknown	Elsevier BV	Unknown	cc-by	Unknown	Unknown	Unknown	FALSE	FALSE	FALSE	FALSE	FALSE	FALSE	Unable to locate article in EPMC._x000D_ Added publisher name from Crossref_x000D_ Added ISSN from Crossref_x000D_ Added journal title from Crossref_x000D_ Found DOI in CORE_x000D_ Searched OpenDOAR but could not find repo and/or URL_x000D_ Added repositories that CORE claims article is available from_x000D_ Could not find DOI in BASE_x000D_ Not attempting Grist API grant lookups since no grants …	43587			2133.12		None	2133.12		CC BY		FALSE
Dundee	Unknown	30793592	10.1021/acs.chemrestox.8b00354	Measuring the interaction of transcription factor Nrf2 with its negative regulator Keap1 in single live cells by an improved FRET/FLIM analysis	Chemical Research in Toxicology	FALSE	0893-228X	Unknown	Unknown	Unknown	American Chemical Society (ACS)	Unknown	cc-by	Unknown	Unknown	Unknown	FALSE	FALSE	FALSE	FALSE	FALSE	FALSE	This article is not open access according to EUPMC, but since 6th March 2020 we take this to mean only that the publisher did not indicate to EUPMC that it can be included in their Open Access subset - it may well still be an OA article._x000D_ Could not find licence via EUPMC_x000D_ Added publisher name from Crossref_x000D_ Added ISSN from Crossref_x000D_ Added journal title from Crossref_x000D_…	43510			3923.48		None	2354.09		CC BY		FALSE
Dundee	PMC6613837	30786807	10.1080/15548627.2019.1580509	A comparative map of macroautophagy and mitophagy in the vertebrate eye	Autophagy	FALSE	1554-8627	Unknown	Unknown	Unknown	Informa UK Limited	not applicable	cc-by	cc-by	epmc_xml_permissions	epmc_xml_permissions	FALSE	TRUE	FALSE	FALSE	FALSE	FALSE	Added PMCID from EUPMC_x000D_ This article is not open access according to EUPMC, but since 6th March 2020 we take this to mean only that the publisher did not indicate to EUPMC that it can be included in their Open Access subset - it may well still be an OA article._x000D_ Checking if XML is available from EUPMC (since 6th March 2020 this is always done for any article we have a PMCID for, regar…	43511			536.4		JiscCollections_Taylor & Francis	268.2		CC BY		FALSE
Dundee	Unknown	30721025	10.1021/acschembio.9b00092	SPR-measured dissociation kinetics of PROTAC ternary complexes influence target degradation rate	ACS Chemical Biology	FALSE	1554-8929	Unknown	Unknown	Unknown	American Chemical Society (ACS)	Unknown	cc-by	Unknown	Unknown	Unknown	FALSE	FALSE	FALSE	FALSE	FALSE	FALSE	Unable to locate article in EPMC._x000D_ Added publisher name from Crossref_x000D_ Added ISSN from Crossref_x000D_ Added journal title from Crossref_x000D_ Found DOI in CORE_x000D_ Searched OpenDOAR but could not find repo and/or URL_x000D_ Added repositories that CORE claims article is available from_x000D_ Could not find DOI in BASE_x000D_ Not attempting Grist API grant lookups since no grants …	43572			3150		Institutional_ membership discount	1575		CC BY		FALSE
Dundee	Unknown	30718567	10.1038/s41598-018-37066-9	High-resolution experimental and computational electrophysiology reveals weak ?-lactam binding events in the porin PorB	Scientific Reports	FALSE	2045-2322	Unknown	Unknown	Unknown	Springer Nature	cc-by	cc-by	Unknown	publisher_splash_page	Unknown	FALSE	FALSE	FALSE	FALSE	FALSE	FALSE	Unable to locate article in EPMC._x000D_ Added publisher name from Crossref_x000D_ Added ISSN from Crossref_x000D_ Added journal title from Crossref_x000D_ Found DOI in CORE_x000D_ Searched OpenDOAR but could not find repo and/or URL_x000D_ Added repositories that CORE claims article is available from_x000D_ Could not find DOI in BASE_x000D_ Not attempting Grist API grant lookups since no grants …	43452			1633.32		Author_Supporter/Membership Discount	1633.32		CC BY		FALSE
Dundee	PMC6430600	30711536	10.1016/j.ympev.2019.01.017	A well supported multi gene phylogeny of 52 dictyostelia	Molecular Phylogenetics and Evolution	FALSE	1055-7903	Unknown	Unknown	Unknown	Elsevier BV	not applicable	cc-by	cc-by	epmc_xml_permissions	epmc_xml_permissions	FALSE	TRUE	FALSE	FALSE	FALSE	FALSE	Added PMCID from EUPMC_x000D_ This article is not open access according to EUPMC, but since 6th March 2020 we take this to mean only that the publisher did not indicate to EUPMC that it can be included in their Open Access subset - it may well still be an OA article._x000D_ Checking if XML is available from EUPMC (since 6th March 2020 this is always done for any article we have a PMCID for, regar…	43515			3623.93		None	3623.93		CC BY		FALSE
Dundee	Unknown	30655943	10.1021/acsmedchemlett.8b00347	Non-genotoxic 3-nitroimidazo[1,2-a]pyridines are NTR1 substrates that display potent in vitro antileishmanial activity	ACS Medicinal Chemistry Letters	FALSE	1948-5875	Unknown	Unknown	Unknown	American Chemical Society (ACS)	Unknown	cc-by	Unknown	Unknown	Unknown	FALSE	FALSE	FALSE	FALSE	FALSE	FALSE	Unable to locate article in EPMC._x000D_ Added publisher name from Crossref_x000D_ Added ISSN from Crossref_x000D_ Added journal title from Crossref_x000D_ Found DOI in CORE_x000D_ Searched OpenDOAR but could not find repo and/or URL_x000D_ Added repositories that CORE claims article is available from_x000D_ Could not find DOI in BASE_x000D_ Not attempting Grist API grant lookups since no grants …	43691			1920		None	960		CC BY		FALSE
Dundee	PMC6361133	30635282	10.1242/dev.170589	A chemical-genetics approach to study the role of atypical Protein Kinase C in Drosophila	Development	FALSE	0950-1991	Unknown	Unknown	Unknown	The Company of Biologists	not applicable	cc-by	cc-by	epmc_xml_permissions	epmc_xml_permissions	FALSE	TRUE	FALSE	FALSE	FALSE	FALSE	Added PMCID from EUPMC_x000D_ This article is not open access according to EUPMC, but since 6th March 2020 we take this to mean only that the publisher did not indicate to EUPMC that it can be included in their Open Access subset - it may well still be an OA article._x000D_ Checking if XML is available from EUPMC (since 6th March 2020 this is always done for any article we have a PMCID for, regar…	43469			3000		None	1500		CC BY		FALSE
Dundee	PMC6307712	30589893	10.1371/journal.ppat.1007475	Gluconeogenesis using glycerol as a substrate in bloodstream-form Trypanosoma brucei	PLOS Pathogens	FALSE	1553-7374	Unknown	Unknown	Unknown	Public Library of Science (PLoS)	not applicable	cc-by	cc-by	epmc_xml_permissions	epmc_xml_permissions	FALSE	TRUE	FALSE	FALSE	FALSE	FALSE	Added PMCID from EUPMC_x000D_ This article is not open access according to EUPMC, but since 6th March 2020 we take this to mean only that the publisher did not indicate to EUPMC that it can be included in their Open Access subset - it may well still be an OA article._x000D_ Checking if XML is available from EUPMC (since 6th March 2020 this is always done for any article we have a PMCID for, regar…	43685			3427.2		None	1713.6		CC BY		FALSE
Dundee	PMC6407917	30570265	10.1021/acs.jmedchem.8b01218	Identification of GSK3186899/DDD853651 as a Preclinical Development Candidate for the Treatment of Visceral Leishmaniasis	Journal of Medicinal Chemistry	FALSE	0022-2623	Unknown	Unknown	Unknown	American Chemical Society (ACS)	not applicable	cc-by	cc-by	epmc_xml_permissions	epmc_xml_permissions	FALSE	TRUE	FALSE	FALSE	FALSE	FALSE	Added PMCID from EUPMC_x000D_ This article is not open access according to EUPMC, but since 6th March 2020 we take this to mean only that the publisher did not indicate to EUPMC that it can be included in their Open Access subset - it may well still be an OA article._x000D_ Checking if XML is available from EUPMC (since 6th March 2020 this is always done for any article we have a PMCID for, regar…	43524			1954.06		ACS_AuthorChoice Institutional membership discount	977.03		CC BY		FALSE
Dundee	PMC6297226	30559339	10.1038/s41467-018-07741-6	Lysosomal protease deficiency or substrate overload induces an oxidative-stress mediated STAT3-dependent pathway of lysosomal homeostasis	Nature Communications	FALSE	2041-1723	Unknown	Unknown	Unknown	Springer Nature	not applicable	cc-by	cc-by	epmc_xml_permissions	epmc_xml_permissions	FALSE	TRUE	FALSE	FALSE	FALSE	FALSE	Added PMCID from EUPMC_x000D_ This article is not open access according to EUPMC, but since 6th March 2020 we take this to mean only that the publisher did not indicate to EUPMC that it can be included in their Open Access subset - it may well still be an OA article._x000D_ Checking if XML is available from EUPMC (since 6th March 2020 this is always done for any article we have a PMCID for, regar…	43557			4476		None	4476		CC BY		FALSE
Dundee	PMC6348446	30540463	10.1021/acs.jmedchem.8b01413	Iterative design and optimization of initially inactive Proteolysis Targeting Chimeras (PROTACs) identify VZ185 as a potent, fast and selective von Hippel-Lindau (VHL)-based dual degrader probe of BRD9 and BRD7	Journal of Medicinal Chemistry	FALSE	0022-2623	Unknown	Unknown	Unknown	American Chemical Society (ACS)	not applicable	cc-by	cc-by	epmc_xml_permissions	epmc_xml_permissions	FALSE	TRUE	FALSE	FALSE	FALSE	FALSE	Added PMCID from EUPMC_x000D_ This article is not open access according to EUPMC, but since 6th March 2020 we take this to mean only that the publisher did not indicate to EUPMC that it can be included in their Open Access subset - it may well still be an OA article._x000D_ Checking if XML is available from EUPMC (since 6th March 2020 this is always done for any article we have a PMCID for, regar…	43686			2828.26		None	2828.26		CC BY		FALSE
Dundee	PMC6347473	30513373	10.1016/j.neuroscience.2018.11.044	Hippocampal lateralization and synaptic plasticity in the intact rat: no left-right asymmetry in electrically induced CA3-CA1 long-term potentiation	Neuroscience	FALSE	0306-4522	Unknown	Unknown	Unknown	Elsevier BV	not applicable	cc-by	cc-by	epmc_xml_permissions	epmc_xml_permissions	FALSE	TRUE	FALSE	FALSE	FALSE	FALSE	Added PMCID from EUPMC_x000D_ This article is not open access according to EUPMC, but since 6th March 2020 we take this to mean only that the publisher did not indicate to EUPMC that it can be included in their Open Access subset - it may well still be an OA article._x000D_ Checking if XML is available from EUPMC (since 6th March 2020 this is always done for any article we have a PMCID for, regar…	43542			3836.49		None	2557.93		CC BY		FALSE
Dundee	PMC6283605	30475806	10.1371/journal.pntd.0006980	Insights into antitrypanosomal drug mode-of-action from cytology-based profiling	PLOS Neglected Tropical Diseases	FALSE	1935-2735	Unknown	Unknown	Unknown	Public Library of Science (PLoS)	not applicable	cc-by	cc-by	epmc_xml_permissions	epmc_xml_permissions	FALSE	TRUE	FALSE	FALSE	FALSE	FALSE	Added PMCID from EUPMC_x000D_ This article is not open access according to EUPMC, but since 6th March 2020 we take this to mean only that the publisher did not indicate to EUPMC that it can be included in their Open Access subset - it may well still be an OA article._x000D_ Checking if XML is available from EUPMC (since 6th March 2020 this is always done for any article we have a PMCID for, regar…	43481			2005.84		ACS_AuthorChoice membership discount	2005.84		CC BY		FALSE
Dundee	Unknown	30459156	10.1124/mol.118.112946	Preclinical evaluation of AZ12601011 and AZ12799734, inhibitors of transforming growth factor beta superfamily type 1 receptors	Molecular Pharmacology	FALSE	0026-895X	Unknown	Unknown	Unknown	American Society for Pharmacology & Experimental Therapeutics (ASPET)	Unknown	Unknown	Unknown	Unknown	Unknown	FALSE	FALSE	FALSE	FALSE	FALSE	FALSE	This article is not open access according to EUPMC, but since 6th March 2020 we take this to mean only that the publisher did not indicate to EUPMC that it can be included in their Open Access subset - it may well still be an OA article._x000D_ Could not find licence via EUPMC_x000D_ Added publisher name from Crossref_x000D_ Added ISSN from Crossref_x000D_ Added journal title from Crossref_x000D_…	43591			3000		None	1500		CC BY		FALSE
Dundee	PMC6332449	30380837	10.1021/acsinfecdis.8b00226	Pharmacological validation of N-myristoyltransferase as a drug target in Leishmania donovani	ACS Infectious Diseases	FALSE	2373-8227	Unknown	Unknown	Unknown	American Chemical Society (ACS)	not applicable	cc-by	cc-by	epmc_xml_permissions	epmc_xml_permissions	FALSE	TRUE	FALSE	FALSE	FALSE	FALSE	Added PMCID from EUPMC_x000D_ This article is not open access according to EUPMC, but since 6th March 2020 we take this to mean only that the publisher did not indicate to EUPMC that it can be included in their Open Access subset - it may well still be an OA article._x000D_ Checking if XML is available from EUPMC (since 6th March 2020 this is always done for any article we have a PMCID for, regar…	43634			3000		None	1500		CC BY		FALSE
Dundee	PMC6195550	30341290	10.1038/s41467-018-06677-1	DHX9 Helicase promotes R-loop formation in cells with impaired RNA splicing	Nature Communications	FALSE	2041-1723	Unknown	Unknown	Unknown	Springer Science and Business Media LLC	not applicable	cc-by	cc-by	epmc_xml_permissions	epmc_xml_permissions	FALSE	TRUE	FALSE	FALSE	FALSE	FALSE	Added PMCID from EUPMC_x000D_ This article is not open access according to EUPMC, but since 6th March 2020 we take this to mean only that the publisher did not indicate to EUPMC that it can be included in their Open Access subset - it may well still be an OA article._x000D_ Checking if XML is available from EUPMC (since 6th March 2020 this is always done for any article we have a PMCID for, regar…	43357			3960		None	1980		CC BY		FALSE
Dundee	PMC6158257	30258100	10.1038/s41598-018-32685-8	USP45 and Spindly are part of the same complex implicated in cell migration	Scientific Reports	FALSE	2045-2322	Unknown	Unknown	Unknown	Springer Nature	not applicable	cc-by	cc-by	epmc_xml_permissions	epmc_xml_permissions	FALSE	TRUE	FALSE	FALSE	FALSE	FALSE	Added PMCID from EUPMC_x000D_ This article is not open access according to EUPMC, but since 6th March 2020 we take this to mean only that the publisher did not indicate to EUPMC that it can be included in their Open Access subset - it may well still be an OA article._x000D_ Checking if XML is available from EUPMC (since 6th March 2020 this is always done for any article we have a PMCID for, regar…	43361			1398		None	699		CC BY		FALSE
Dundee	PMC6138640	30218051	10.1038/s41467-018-06276-0	The last-born daughter cell contributes to division orientation of Drosophila larval neuroblasts	Nature Communications	FALSE	2041-1723	Unknown	Unknown	Unknown	Springer Science and Business Media LLC	not applicable	cc-by	cc-by	epmc_xml_permissions	epmc_xml_permissions	FALSE	TRUE	FALSE	FALSE	FALSE	FALSE	Added PMCID from EUPMC_x000D_ This article is not open access according to EUPMC, but since 6th March 2020 we take this to mean only that the publisher did not indicate to EUPMC that it can be included in their Open Access subset - it may well still be an OA article._x000D_ Checking if XML is available from EUPMC (since 6th March 2020 this is always done for any article we have a PMCID for, regar…	43347			3960		None	3960		CC BY		FALSE
Dundee	PMC6167002	30207721	10.1021/acs.jmedchem.8b00884	A Molecular Hybridization Approach for the Design of Potent, Highly Selective, and Brain-Penetrant N-Myristoyltransferase Inhibitors	Journal of Medicinal Chemistry	FALSE	0022-2623	Unknown	Unknown	Unknown	American Chemical Society (ACS)	not applicable	cc-by	cc-by	epmc_xml_permissions	epmc_xml_permissions	FALSE	TRUE	FALSE	FALSE	FALSE	FALSE	Added PMCID from EUPMC_x000D_ This article is not open access according to EUPMC, but since 6th March 2020 we take this to mean only that the publisher did not indicate to EUPMC that it can be included in their Open Access subset - it may well still be an OA article._x000D_ Checking if XML is available from EUPMC (since 6th March 2020 this is always done for any article we have a PMCID for, regar…	43368			3167.87		None	3167.87		CC BY		FALSE
Dundee	PMC6198475	30201686	10.1242/dev.164319	Lineage tracing axial progenitors using Nkx1-2CreERT2 mice defines their trunk and tail contributions	Development	FALSE	0950-1991	Unknown	Unknown	Unknown	The Company of Biologists	not applicable	cc-by	cc-by	epmc_xml_permissions	epmc_xml_permissions	FALSE	TRUE	FALSE	FALSE	FALSE	FALSE	Added PMCID from EUPMC_x000D_ This article is not open access according to EUPMC, but since 6th March 2020 we take this to mean only that the publisher did not indicate to EUPMC that it can be included in their Open Access subset - it may well still be an OA article._x000D_ Checking if XML is available from EUPMC (since 6th March 2020 this is always done for any article we have a PMCID for, regar…	43347			3000		None	1500		CC BY		FALSE
Dundee	PMC3879062	24283456	10.1186/1752-1947-7-239	Biomed Central membership	Journal of Medical Case Reports	FALSE	1752-1947	Unknown	Unknown	Unknown	Springer Science and Business Media LLC	not applicable	cc-by	cc-by	epmc_xml_permissions	epmc_xml_permissions	FALSE	TRUE	FALSE	FALSE	FALSE	FALSE	Added PMCID from EUPMC_x000D_ Added PMID from EUPMC_x000D_ Added DOI from EUPMC_x000D_ This article is not open access according to EUPMC, but since 6th March 2020 we take this to mean only that the publisher did not indicate to EUPMC that it can be included in their Open Access subset - it may well still be an OA article._x000D_ Checking if XML is available from EUPMC (since 6th March 2020 this …	43564			2136.05	5	None	2141.05		CC BY		FALSE
Edinbrugh	Unknown	Unknown	10.1177/0034523719867102	Current strategies for quantification of estrogen in clinical research	Research in Education	FALSE	0034-5237	Unknown	Unknown	Unknown	SAGE Publications	cc-by	cc-by	Unknown	publisher_splash_page	Unknown	FALSE	FALSE	FALSE	FALSE	FALSE	FALSE	Unable to locate article in EPMC._x000D_ Added publisher name from Crossref_x000D_ Added ISSN from Crossref_x000D_ Added journal title from Crossref_x000D_ Could not find DOI in CORE_x000D_ Could not find DOI in BASE_x000D_ Not attempting Grist API grant lookups since no grants data was obtained from EUPMC._x000D_ Not checking ahead of print status on pubmed. We don't have the article's PMID._x00…	43714	3100	GBP	3100	0		3100		CC-BY		Unknown
Edinbrugh	Unknown	Unknown	10.1080/09581596.2018.1552778	Hostage to Fortune: An Empirical Study of the Tobacco Industry?s Business Strategies Since the Advent of E-Cigarettes	Critical Public Health	FALSE	0958-1596	Unknown	2018-11-20T00:00:00Z	Unknown	Informa UK Limited	Unknown	cc-by	cc-by	Unknown	Unknown	FALSE	FALSE	FALSE	FALSE	FALSE	FALSE	Unable to locate article in EPMC._x000D_ Added publisher name from Crossref_x000D_ Added ISSN from Crossref_x000D_ Added journal title from Crossref_x000D_ Found DOI in CORE_x000D_ Searched OpenDOAR but could not find repo and/or URL_x000D_ Added repositories that CORE claims article is available from_x000D_ Found DOI in BASE_x000D_ Searched OpenDOAR but could not find repo and/or URL_x000D_ Not …	43447	1932.9	GBP	1932.9	0	Taylor & Francis	1932.9		CC-BY		Unknown
Edinbrugh	Unknown	Unknown	10.1109/ACCESS.2019.2907769	Distance Oriented Particle Swarm Optimizer for Brain Image Registration	IEEE Access	TRUE	2169-3536	Unknown	2019-03-29T00:00:00Z	Unknown	Institute of Electrical and Electronics Engineers (IEEE)	Unknown	cc-by	cc-by	Unknown	Unknown	FALSE	FALSE	FALSE	FALSE	FALSE	FALSE	Unable to locate article in EPMC._x000D_ Added publisher name from Crossref_x000D_ Added ISSN from Crossref_x000D_ Added journal title from Crossref_x000D_ Found DOI in CORE_x000D_ Searched OpenDOAR but could not find repo and/or URL_x000D_ Added repositories that CORE claims article is available from_x000D_ Could not find DOI in BASE_x000D_ Not attempting Grist API grant lookups since no grants …	43593	1364.16	USD	1636.99	0		1636.99		CC-BY		Unknown
Edinbrugh	Unknown	Unknown	10.1177/1360780418823221	Re-imagining Healthcare and Medical Research Systems in Post Devolution Scotland	Sociological Research Online	FALSE	1360-7804	Unknown	2019-03-01T00:00:00Z	Unknown	SAGE Publications	cc-by	cc-by	Unknown	publisher_splash_page	Unknown	FALSE	FALSE	FALSE	FALSE	FALSE	FALSE	Unable to locate article in EPMC._x000D_ Added publisher name from Crossref_x000D_ Added ISSN from Crossref_x000D_ Added journal title from Crossref_x000D_ Found DOI in CORE_x000D_ Searched OpenDOAR but could not find repo and/or URL_x000D_ Added repositories that CORE claims article is available from_x000D_ Found DOI in BASE_x000D_ Searched OpenDOAR but could not find repo and/or URL_x000D_ Not …	43488	200	GBP	240	0		240		CC-BY		Unknown
Edinbrugh	Unknown	31729209	10.1530/erp-19-0040	3D angle-independent Doppler and speckle tracking for the myocardium and blood flow	Echo research and practice	TRUE	2055-0464	2055-0464	2019-12-01T00:00:00Z	2019-12-01T00:00:00Z	Bioscientifica	cc-by	cc-by	Unknown	publisher_splash_page	Unknown	FALSE	FALSE	FALSE	FALSE	FALSE	FALSE	Added PMID from EUPMC_x000D_ Added DOI from EUPMC_x000D_ This article is not open access according to EUPMC, but since 6th March 2020 we take this to mean only that the publisher did not indicate to EUPMC that it can be included in their Open Access subset - it may well still be an OA article._x000D_ Added journal title from EUPMC_x000D_ Added issn from EUPMC_x000D_ Added eissn from EUPMC_x000D_ …	43763	1145	GBP	1145	0		1145		CC-BY		FALSE
Edinbrugh	Unknown	31729209	10.1530/erp-19-0040	Epigenetics, Education, and the Plastic Body: Changing Concepts and New Engagements	Echo research and practice	TRUE	2055-0464	2055-0464	2019-12-01T00:00:00Z	2019-12-01T00:00:00Z	Bioscientifica	cc-by	cc-by	Unknown	publisher_splash_page	Unknown	FALSE	FALSE	FALSE	FALSE	FALSE	FALSE	Added PMID from EUPMC_x000D_ Added DOI from EUPMC_x000D_ This article is not open access according to EUPMC, but since 6th March 2020 we take this to mean only that the publisher did not indicate to EUPMC that it can be included in their Open Access subset - it may well still be an OA article._x000D_ Added journal title from EUPMC_x000D_ Added issn from EUPMC_x000D_ Added eissn from EUPMC_x000D_ …	43727	200	GBP	240	0		240		CC-BY		FALSE
Edinbrugh	PMC6805783	31660151	10.1093/emph/eoz028	Emerging Techniques in Atherosclerosis Imaging	Evolution, medicine, and public health	TRUE	2050-6201	2050-6201	2019-01-01T00:00:00Z	2019-09-28T00:00:00Z	Oxford University Press (OUP)	not applicable	cc-by	cc-by	epmc_api	epmc_api	TRUE	TRUE	FALSE	TRUE	TRUE	TRUE	Added PMCID from EUPMC_x000D_ Added PMID from EUPMC_x000D_ Confirmed fulltext is in EUPMC_x000D_ Confirmed is open access from EUPMC_x000D_ Added journal title from EUPMC_x000D_ Added issn from EUPMC_x000D_ Added eissn from EUPMC_x000D_ Added grants data from EUPMC_x000D_ Added date of publication from EUPMC_x000D_ Added electronic publication date from EUPMC_x000D_ Checking if XML is available f…	43775	2000	GBP	2400	0		2400		CC-BY		Unknown
Edinbrugh	PMC6891087	31570499	10.1083/jcb.201905040	Marketing Experimental Stem Cell Therapies in the UK: Biomedical Lifestyle Products and the Promise of Regenerative Medicine in the Digital Era	The Journal of cell biology	FALSE	0021-9525, 1540-8140	1540-8140	2019-12-01T00:00:00Z	2019-09-30T00:00:00Z	Rockefeller University Press	not applicable	cc-by	cc-by	epmc_api	epmc_api	TRUE	TRUE	FALSE	TRUE	TRUE	TRUE	Added PMCID from EUPMC_x000D_ Added PMID from EUPMC_x000D_ Confirmed fulltext is in EUPMC_x000D_ Confirmed is open access from EUPMC_x000D_ Added journal title from EUPMC_x000D_ Added issn from EUPMC_x000D_ Added eissn from EUPMC_x000D_ Added grants data from EUPMC_x000D_ Added date of publication from EUPMC_x000D_ Added electronic publication date from EUPMC_x000D_ Checking if XML is available f…	43726	598.5	GBP	598.5	0	Taylor & Francis	598.5		CC-BY		Unknown
Edinbrugh	PMC6753376	31556486	10.15252/msb.20198994	Borealis-Nucleosome interaction secures chromosome association of the Chromosomal passenger complex	Molecular systems biology	TRUE	1744-4292	1744-4292	2019-09-01T00:00:00Z	Unknown	EMBO	not applicable	cc-by	cc-by	epmc_api	epmc_api	TRUE	TRUE	FALSE	TRUE	TRUE	TRUE	Added PMCID from EUPMC_x000D_ Added PMID from EUPMC_x000D_ Confirmed fulltext is in EUPMC_x000D_ Confirmed is open access from EUPMC_x000D_ Added journal title from EUPMC_x000D_ Added issn from EUPMC_x000D_ Added eissn from EUPMC_x000D_ Added grants data from EUPMC_x000D_ Added date of publication from EUPMC_x000D_ Checking if XML is available from EUPMC (since 6th March 2020 this is always done …	43763	3951.3	USD	3951.3	0		3951.3		CC-BY		Unknown
Edinbrugh	PMC6753376	31556486	10.15252/msb.20198994	An integrated workflow for crosslinking mass spectrometry	Unknown	FALSE	Unknown	Unknown	2019-09-01T00:00:00Z	Unknown	Unknown	Unknown	cc-by	Unknown	Unknown	Unknown	FALSE	FALSE	FALSE	FALSE	FALSE	FALSE	Unable to locate article in EPMC._x000D_ Unable to obtain DOI, PMID or PMCID for this article. Compliance information may be severely limited._x000D_ Not attempting Crossref / CORE / BASE lookups - do not have DOI for article._x000D_ Not attempting Grist API grant lookups since no grants data was obtained from EUPMC._x000D_ Not checking ahead of print status on pubmed. We don't have the article's…		2063	GBP	2063	0	John Wiley & Sons Ltd	2063		CC-BY		Unknown
Edinbrugh	PMC6857754	31518429	10.1093/ije/dyz182	Nessys: a new set of tools for the automated detection of nuclei within intact tissues and dense 3D cultures	International journal of epidemiology	FALSE	0300-5771, 1464-3685	1464-3685	2019-10-01T00:00:00Z	Unknown	Oxford University Press (OUP)	not applicable	cc-by	cc-by	epmc_api	epmc_api	TRUE	TRUE	FALSE	TRUE	TRUE	TRUE	Added PMCID from EUPMC_x000D_ Added DOI from EUPMC_x000D_ Confirmed fulltext is in EUPMC_x000D_ Confirmed is open access from EUPMC_x000D_ Added journal title from EUPMC_x000D_ Added issn from EUPMC_x000D_ Added eissn from EUPMC_x000D_ Added grants data from EUPMC_x000D_ Added date of publication from EUPMC_x000D_ Checking if XML is available from EUPMC (since 6th March 2020 this is always done f…	43704	2489.27	USD	2489.27	0		2489.27		CC-BY		Unknown
Edinbrugh	PMC6916425	31508850	10.1002/glia.23717	Noninvasive Imaging to Assess Atherosclerotic Plaque Composition and Disease Activity: Coronary and Carotid Applications	Glia	FALSE	0894-1491, 1098-1136	1098-1136	2020-02-01T00:00:00Z	2019-09-11T00:00:00Z	Wiley	not applicable	cc-by	cc-by	epmc_api	epmc_api	TRUE	TRUE	FALSE	TRUE	TRUE	TRUE	Added PMCID from EUPMC_x000D_ Added DOI from EUPMC_x000D_ Confirmed fulltext is in EUPMC_x000D_ Confirmed is open access from EUPMC_x000D_ Added journal title from EUPMC_x000D_ Added issn from EUPMC_x000D_ Added eissn from EUPMC_x000D_ Added grants data from EUPMC_x000D_ Added date of publication from EUPMC_x000D_ Added electronic publication date from EUPMC_x000D_ Checking if XML is available fr…	43696	2350	GBP	2350	0		2350		CC-BY-NC-ND		Unknown
Edinbrugh	PMC6916425	31508850	10.1002/glia.23717	Gene expression profiling reveals a conserved microglia	Glia	FALSE	0894-1491, 1098-1136	1098-1136	2020-02-01T00:00:00Z	2019-09-11T00:00:00Z	Wiley	not applicable	cc-by	cc-by	epmc_api	epmc_api	TRUE	TRUE	FALSE	TRUE	TRUE	TRUE	Added PMCID from EUPMC_x000D_ Added PMID from EUPMC_x000D_ Added DOI from EUPMC_x000D_ Confirmed fulltext is in EUPMC_x000D_ Confirmed is open access from EUPMC_x000D_ Added journal title from EUPMC_x000D_ Added issn from EUPMC_x000D_ Added eissn from EUPMC_x000D_ Added grants data from EUPMC_x000D_ Added date of publication from EUPMC_x000D_ Added electronic publication date from EUPMC_x000D_ Ch…		2100	GBP	2100	0	John Wiley & Sons Ltd	2100		CC-BY		Unknown
Edinbrugh	Unknown	31502858	10.1259/bjr.20180309	Rosetting revisited: a critical look at the evidence for host erythrocyte receptors in Plasmod	The British journal of radiology	FALSE	0007-1285, 1748-880X	1748-880X	2019-11-01T00:00:00Z	2019-09-10T00:00:00Z	British Institute of Radiology	cc-by	cc-by	Unknown	publisher_splash_page	Unknown	FALSE	FALSE	FALSE	FALSE	FALSE	FALSE	Added DOI from EUPMC_x000D_ This article is not open access according to EUPMC, but since 6th March 2020 we take this to mean only that the publisher did not indicate to EUPMC that it can be included in their Open Access subset - it may well still be an OA article._x000D_ Added journal title from EUPMC_x000D_ Added issn from EUPMC_x000D_ Added eissn from EUPMC_x000D_ Added grants data from EUPMC_…	43734	3030.11	USD	3030.11	0		3030.11		CC-BY		FALSE
Edinbrugh	PMC6715702	31467332	10.1038/s41598-019-48446-0	Human Artificial Chromosomes that Bypass Centromeric DNA	Scientific reports	TRUE	2045-2322	2045-2322	2019-08-01T00:00:00Z	2019-08-29T00:00:00Z	Springer Science and Business Media LLC	not applicable	cc-by	cc-by	epmc_api	epmc_api	TRUE	TRUE	FALSE	TRUE	TRUE	TRUE	Added PMCID from EUPMC_x000D_ Added PMID from EUPMC_x000D_ Confirmed fulltext is in EUPMC_x000D_ Confirmed is open access from EUPMC_x000D_ Added journal title from EUPMC_x000D_ Added issn from EUPMC_x000D_ Added eissn from EUPMC_x000D_ Added grants data from EUPMC_x000D_ Added date of publication from EUPMC_x000D_ Added electronic publication date from EUPMC_x000D_ Checking if XML is available f…	43675	4080	GBP	4896	0		4896		CC-BY		Unknown
Edinbrugh	PMC6900227	31467152	10.1136/heartjnl-2019-314987	Reconstitution of microtubule nucleation in vitro reveals novel roles for Mzt1	Heart (British Cardiac Society)	FALSE	1355-6037, 1468-201X	1468-201X	2019-12-01T00:00:00Z	2019-08-29T00:00:00Z	BMJ	not applicable	cc-by	cc-by	epmc_api	epmc_api	TRUE	TRUE	FALSE	TRUE	TRUE	TRUE	Added PMCID from EUPMC_x000D_ Added DOI from EUPMC_x000D_ Confirmed fulltext is in EUPMC_x000D_ Confirmed is open access from EUPMC_x000D_ Added journal title from EUPMC_x000D_ Added issn from EUPMC_x000D_ Added eissn from EUPMC_x000D_ Added grants data from EUPMC_x000D_ Added date of publication from EUPMC_x000D_ Added electronic publication date from EUPMC_x000D_ Checking if XML is available fr…	43636	4033.83	EUR	4840.59	0		4840.59		CC-BY		Unknown
Edinbrugh	PMC7050047	31455446	10.1017/S0031182019001288	Phenome Wide Mendelian Randomization Study of genetically determined Vitamin D on multiple health outcomes using the UK Biobank Study	Parasitology	FALSE	0031-1820, 1469-8161	1469-8161	2020-01-01T00:00:00Z	2019-09-16T00:00:00Z	Cambridge University Press (CUP)	not applicable	cc-by	cc-by	epmc_api	epmc_api	TRUE	TRUE	FALSE	TRUE	TRUE	TRUE	Added PMCID from EUPMC_x000D_ Added PMID from EUPMC_x000D_ Confirmed fulltext is in EUPMC_x000D_ Confirmed is open access from EUPMC_x000D_ Added journal title from EUPMC_x000D_ Added issn from EUPMC_x000D_ Added eissn from EUPMC_x000D_ Added date of publication from EUPMC_x000D_ Added electronic publication date from EUPMC_x000D_ Checking if XML is available from EUPMC (since 6th March 2020 this…	43696	2371	GBP	2845.2	0		2845.2		CC-BY		Unknown
Edinbrugh	PMC7050047	31455446	10.1017/S0031182019001288	Alkyne-tagged PLGA allows direct visualisation of nanoparticles in vitro and ex vivo by stimulated Raman scattering microscopy	Parasitology	FALSE	0031-1820, 1469-8161	1469-8161	2020-01-01T00:00:00Z	2019-09-16T00:00:00Z	Cambridge University Press (CUP)	not applicable	cc-by	cc-by	epmc_api	epmc_api	TRUE	TRUE	FALSE	TRUE	TRUE	TRUE	Added PMCID from EUPMC_x000D_ Added DOI from EUPMC_x000D_ Confirmed fulltext is in EUPMC_x000D_ Confirmed is open access from EUPMC_x000D_ Added journal title from EUPMC_x000D_ Added issn from EUPMC_x000D_ Added eissn from EUPMC_x000D_ Added date of publication from EUPMC_x000D_ Added electronic publication date from EUPMC_x000D_ Checking if XML is available from EUPMC (since 6th March 2020 this …	43698	3551.56	USD	3551.56	0		0		CC-BY		Unknown
Edinbrugh	PMC6776898	31448519	10.15252/embr.201947734	Quorum Sensing in African Trypanosomes	EMBO reports	FALSE	1469-221X, 1469-3178	1469-3178	2019-10-01T00:00:00Z	2019-08-26T00:00:00Z	EMBO	not applicable	cc-by	cc-by	epmc_api	epmc_api	TRUE	TRUE	FALSE	TRUE	TRUE	TRUE	Added PMCID from EUPMC_x000D_ Added DOI from EUPMC_x000D_ Confirmed fulltext is in EUPMC_x000D_ Confirmed is open access from EUPMC_x000D_ Added journal title from EUPMC_x000D_ Added issn from EUPMC_x000D_ Added eissn from EUPMC_x000D_ Added grants data from EUPMC_x000D_ Added date of publication from EUPMC_x000D_ Added electronic publication date from EUPMC_x000D_ Checking if XML is available fr…	43696	3140	GBP	3140	0		3140		CC-BY		Unknown
Edinbrugh	PMC6715702	31442903	10.1016/j.mib.2019.07.001	Network analysis of canine brain morphometry links tumour risk to oestrogen deficiency and accelerated brain ageing	Current opinion in microbiology	FALSE	1369-5274, 1879-0364	1879-0364	2019-12-01T00:00:00Z	2019-08-20T00:00:00Z	Elsevier BV	Unknown	cc-by	cc-by	Unknown	Unknown	FALSE	FALSE	FALSE	FALSE	FALSE	FALSE	Added PMID from EUPMC_x000D_ This article is not open access according to EUPMC, but since 6th March 2020 we take this to mean only that the publisher did not indicate to EUPMC that it can be included in their Open Access subset - it may well still be an OA article._x000D_ Added journal title from EUPMC_x000D_ Added issn from EUPMC_x000D_ Added eissn from EUPMC_x000D_ Added date of publication fr…	43685	1290	GBP	1548	0		1548		CC-BY		FALSE
Edinbrugh	PMC6961686	31442903	10.1016/j.mib.2019.07.001	Non-alcoholic fatty liver disease (NAFLD) is associated with dynamic changes in DNA hydroxymethylation	Current opinion in microbiology	FALSE	1369-5274, 1879-0364	1879-0364	2019-12-01T00:00:00Z	2019-08-20T00:00:00Z	Elsevier BV	Unknown	cc-by	cc-by	Unknown	Unknown	FALSE	FALSE	FALSE	FALSE	FALSE	FALSE	Added DOI from EUPMC_x000D_ This article is not open access according to EUPMC, but since 6th March 2020 we take this to mean only that the publisher did not indicate to EUPMC that it can be included in their Open Access subset - it may well still be an OA article._x000D_ Added journal title from EUPMC_x000D_ Added issn from EUPMC_x000D_ Added eissn from EUPMC_x000D_ Added date of publication fro…	43678	709.5	GBP	709.5	0	Taylor & Francis	709.5		CC-BY		FALSE
Edinbrugh	PMC6929706	31422361	10.1136/heartjnl-2019-315103	Fetal liver Mll-AF4+ hematopoietic stem and progenitor cells respond directly to poly(I:C), but not to a single maternal immune activation	Heart (British Cardiac Society)	FALSE	1355-6037, 1468-201X	1468-201X	2019-12-01T00:00:00Z	2019-08-17T00:00:00Z	BMJ	not applicable	cc-by	cc-by	epmc_api	epmc_api	TRUE	TRUE	FALSE	TRUE	TRUE	TRUE	Added PMCID from EUPMC_x000D_ Added DOI from EUPMC_x000D_ Confirmed fulltext is in EUPMC_x000D_ Confirmed is open access from EUPMC_x000D_ Added journal title from EUPMC_x000D_ Added issn from EUPMC_x000D_ Added eissn from EUPMC_x000D_ Added grants data from EUPMC_x000D_ Added date of publication from EUPMC_x000D_ Added electronic publication date from EUPMC_x000D_ Checking if XML is available fr…	43683	1768	GBP	1768	0		0		CC-BY		Unknown
Edinbrugh	PMC6794644	31408325	10.1021/acs.biomac.9b01092	Targeting of Early Endosomes by Autophagy Facilitates EGFR Recycling and Signalling	Biomacromolecules	FALSE	1525-7797, 1526-4602	1526-4602	2019-10-01T00:00:00Z	2019-08-29T00:00:00Z	American Chemical Society (ACS)	not applicable	cc-by	cc-by	epmc_xml_permissions	epmc_xml_permissions	TRUE	TRUE	FALSE	TRUE	TRUE	TRUE	Added PMCID from EUPMC_x000D_ Added DOI from EUPMC_x000D_ Confirmed fulltext is in EUPMC_x000D_ Confirmed is open access from EUPMC_x000D_ Added journal title from EUPMC_x000D_ Added issn from EUPMC_x000D_ Added eissn from EUPMC_x000D_ Added grants data from EUPMC_x000D_ Added date of publication from EUPMC_x000D_ Added electronic publication date from EUPMC_x000D_ Checking if XML is available fr…	43692	3150	GBP	3150	0	John Wiley & Sons Ltd	3150		CC-BY		Unknown
Edinbrugh	PMC6961686	31389294	10.1080/15592294.2019.1649527	Variation in local and systemic pro-inflammatory immune markers of wild wood mice after anthelminthic treatment	Epigenetics	FALSE	1559-2294, 1559-2308	1559-2308	2020 Jan - Feb	2019-08-07T00:00:00Z	Informa UK Limited	not applicable	cc-by	cc-by	epmc_api	epmc_api	TRUE	TRUE	FALSE	TRUE	TRUE	TRUE	Added PMCID from EUPMC_x000D_ Added PMID from EUPMC_x000D_ Confirmed fulltext is in EUPMC_x000D_ Confirmed is open access from EUPMC_x000D_ Added journal title from EUPMC_x000D_ Added issn from EUPMC_x000D_ Added eissn from EUPMC_x000D_ Added grants data from EUPMC_x000D_ Added date of publication from EUPMC_x000D_ Added electronic publication date from EUPMC_x000D_ Checking if XML is available f…	43748	2310	GBP	2772	0		2772		CC-BY		Unknown
Edinbrugh	PMC6961686	31389294	10.1080/15592294.2019.1649527	Predictive validity of a novel non-invasive estimation of effective shunt fraÃ¢Â€Â¦	Epigenetics	FALSE	1559-2294, 1559-2308	1559-2308	2020 Jan - Feb	2019-08-07T00:00:00Z	Informa UK Limited	not applicable	cc-by	cc-by	epmc_api	epmc_api	TRUE	TRUE	FALSE	TRUE	TRUE	TRUE	Added PMCID from EUPMC_x000D_ Added DOI from EUPMC_x000D_ Confirmed fulltext is in EUPMC_x000D_ Confirmed is open access from EUPMC_x000D_ Added journal title from EUPMC_x000D_ Added issn from EUPMC_x000D_ Added eissn from EUPMC_x000D_ Added grants data from EUPMC_x000D_ Added date of publication from EUPMC_x000D_ Added electronic publication date from EUPMC_x000D_ Checking if XML is available fr…	43690	1620	GBP	1944	0		1944		CC-BY		Unknown
Edinbrugh	PMC7034532	31389254	10.1080/15563650.2019.1628969	I Am, I Am, I Am: Seventeen Brushes With Death, by Maggie OÃ¢Â€Â™Farrell	Clinical toxicology (Philadelphia, Pa.)	FALSE	1556-3650, 1556-9519	1556-9519	2020-03-01T00:00:00Z	2019-08-07T00:00:00Z	Informa UK Limited	not applicable	cc-by	cc-by	epmc_api	epmc_api	TRUE	TRUE	FALSE	TRUE	TRUE	TRUE	Added PMCID from EUPMC_x000D_ Added DOI from EUPMC_x000D_ Confirmed fulltext is in EUPMC_x000D_ Confirmed is open access from EUPMC_x000D_ Added journal title from EUPMC_x000D_ Added issn from EUPMC_x000D_ Added eissn from EUPMC_x000D_ Added date of publication from EUPMC_x000D_ Added electronic publication date from EUPMC_x000D_ Checking if XML is available from EUPMC (since 6th March 2020 this …	43608	1989	GBP	1989	0	BMJ Publishing Group Ltd	1989		CC-BY		Unknown
Edinbrugh	PMC6859497	31381950	10.1016/j.exphem.2019.07.004	Global burden of atherosclerotic cardiovascular disease in people living with the hepatitis C virus: A systematic review, meta	Experimental hematology	FALSE	0301-472X, 1873-2399	1873-2399	2019-08-01T00:00:00Z	2019-08-02T00:00:00Z	Elsevier BV	not applicable	cc-by	cc-by	epmc_api	epmc_api	TRUE	TRUE	FALSE	TRUE	TRUE	TRUE	Added PMCID from EUPMC_x000D_ Added DOI from EUPMC_x000D_ Confirmed fulltext is in EUPMC_x000D_ Confirmed is open access from EUPMC_x000D_ Added journal title from EUPMC_x000D_ Added issn from EUPMC_x000D_ Added eissn from EUPMC_x000D_ Added grants data from EUPMC_x000D_ Added date of publication from EUPMC_x000D_ Added electronic publication date from EUPMC_x000D_ Checking if XML is available fr…	43714	4709.84	EUR	4709.84	0		4709.84		CC-BY		Unknown
Edinbrugh	PMC6660464	31372406	10.1016/j.dib.2019.103740	Data for analysis of catechol estrogen metabolites in human plasma by liquid chromatography tandem mass spectrometry	Data in brief	TRUE	2352-3409	2352-3409	2019-04-01T00:00:00Z	2019-03-08T00:00:00Z	Elsevier BV	not applicable	cc-by	cc-by	epmc_api	epmc_api	TRUE	TRUE	FALSE	TRUE	TRUE	TRUE	Added PMCID from EUPMC_x000D_ Added PMID from EUPMC_x000D_ Confirmed fulltext is in EUPMC_x000D_ Confirmed is open access from EUPMC_x000D_ Added journal title from EUPMC_x000D_ Added issn from EUPMC_x000D_ Added eissn from EUPMC_x000D_ Added grants data from EUPMC_x000D_ Added date of publication from EUPMC_x000D_ Added electronic publication date from EUPMC_x000D_ Checking if XML is available f…	43536	377.51	EUR	453.01	0		453.01		CC-BY		Unknown
Edinbrugh	PMC6863754	31368489	10.1093/icb/icz136	Conditional deletion of E11/podoplanin in bone protects against load-induced osteoarthritis	Integrative and comparative biology	FALSE	1540-7063, 1557-7023	1557-7023	2019-11-01T00:00:00Z	Unknown	Oxford University Press (OUP)	not applicable	cc-by	cc-by	epmc_api	epmc_api	TRUE	TRUE	FALSE	TRUE	TRUE	TRUE	Added PMCID from EUPMC_x000D_ Added PMID from EUPMC_x000D_ Confirmed fulltext is in EUPMC_x000D_ Confirmed is open access from EUPMC_x000D_ Added journal title from EUPMC_x000D_ Added issn from EUPMC_x000D_ Added eissn from EUPMC_x000D_ Added grants data from EUPMC_x000D_ Added date of publication from EUPMC_x000D_ Checking if XML is available from EUPMC (since 6th March 2020 this is always done …	43668	1420	GBP	1704	0		1704		CC-BY		Unknown
Edinbrugh	PMC6863754	31368489	10.1093/icb/icz136	Impact of specialist and primary care stop smoking support on socioeconomic inequalities in cessation in the UK: a systematicÃ¢Â€Â¦	Integrative and comparative biology	FALSE	1540-7063, 1557-7023	1557-7023	2019-11-01T00:00:00Z	Unknown	Oxford University Press (OUP)	not applicable	cc-by	cc-by	epmc_api	epmc_api	TRUE	TRUE	FALSE	TRUE	TRUE	TRUE	Added PMCID from EUPMC_x000D_ Added DOI from EUPMC_x000D_ Confirmed fulltext is in EUPMC_x000D_ Confirmed is open access from EUPMC_x000D_ Added journal title from EUPMC_x000D_ Added issn from EUPMC_x000D_ Added eissn from EUPMC_x000D_ Added grants data from EUPMC_x000D_ Added date of publication from EUPMC_x000D_ Checking if XML is available from EUPMC (since 6th March 2020 this is always done f…	43676	1650	GBP	1650	0	John Wiley & Sons Ltd	1650		CC-BY		Unknown
Edinbrugh	PMC6973008	31357250	10.1111/add.14760	The molecular architecture of the meiotic spindle is remodeled during metaphase arrest in oocytes	Addiction (Abingdon, England)	FALSE	0965-2140, 1360-0443	1360-0443	2020-01-01T00:00:00Z	2019-09-10T00:00:00Z	Wiley	not applicable	cc-by	cc-by	epmc_api	epmc_api	TRUE	TRUE	FALSE	TRUE	TRUE	TRUE	Added PMCID from EUPMC_x000D_ Added DOI from EUPMC_x000D_ Confirmed fulltext is in EUPMC_x000D_ Confirmed is open access from EUPMC_x000D_ Added journal title from EUPMC_x000D_ Added issn from EUPMC_x000D_ Added eissn from EUPMC_x000D_ Added grants data from EUPMC_x000D_ Added date of publication from EUPMC_x000D_ Added electronic publication date from EUPMC_x000D_ Checking if XML is available fr…	43670	4077.37	USD	4892.84	0		0		CC-BY		Unknown
Edinbrugh	PMC6663012	31356616	10.1371/journal.pone.0220225	Brain tumours repurpose endogenous neuron to microglia signalling mechanisms to promote their own proliferation	PloS one	TRUE	1932-6203	1932-6203	2019-01-01T00:00:00Z	2019-07-29T00:00:00Z	Public Library of Science (PLoS)	not applicable	cc-by	cc-by	epmc_api	epmc_api	TRUE	TRUE	FALSE	TRUE	TRUE	TRUE	Added PMCID from EUPMC_x000D_ Added PMID from EUPMC_x000D_ Confirmed fulltext is in EUPMC_x000D_ Confirmed is open access from EUPMC_x000D_ Added journal title from EUPMC_x000D_ Added issn from EUPMC_x000D_ Added eissn from EUPMC_x000D_ Added grants data from EUPMC_x000D_ Added date of publication from EUPMC_x000D_ Added electronic publication date from EUPMC_x000D_ Checking if XML is available f…	43672	2448.81	USD	2448.81	0		2448.81		CC-BY		Unknown
Edinbrugh	PMC6661085	31351471	10.1186/s12891-019-2731-9	The Clinical Utility of Hybrid Imaging for the Identification of Vulnerable Plaque and Vulnerable Patients	BMC musculoskeletal disorders	TRUE	1471-2474	1471-2474	2019-07-01T00:00:00Z	2019-07-27T00:00:00Z	Springer Science and Business Media LLC	not applicable	cc-by	cc-by	epmc_api	epmc_api	TRUE	TRUE	FALSE	TRUE	TRUE	TRUE	Added PMCID from EUPMC_x000D_ Added PMID from EUPMC_x000D_ Confirmed fulltext is in EUPMC_x000D_ Confirmed is open access from EUPMC_x000D_ Added journal title from EUPMC_x000D_ Added issn from EUPMC_x000D_ Added eissn from EUPMC_x000D_ Added grants data from EUPMC_x000D_ Added date of publication from EUPMC_x000D_ Added electronic publication date from EUPMC_x000D_ Checking if XML is available f…	43677	2160	GBP	2592	0		2592		CC-BY-NC-ND		Unknown
Edinbrugh	PMC6661085	31351471	10.1186/s12891-019-2731-9	Effects of common genetic variants associated with colorectal cancer risk of survival outcomes after diagnosis: a large population-based cohort study	BMC musculoskeletal disorders	TRUE	1471-2474	1471-2474	2019-07-01T00:00:00Z	2019-07-27T00:00:00Z	Springer Science and Business Media LLC	not applicable	cc-by	cc-by	epmc_api	epmc_api	TRUE	TRUE	FALSE	TRUE	TRUE	TRUE	Added PMCID from EUPMC_x000D_ Added DOI from EUPMC_x000D_ Confirmed fulltext is in EUPMC_x000D_ Confirmed is open access from EUPMC_x000D_ Added journal title from EUPMC_x000D_ Added issn from EUPMC_x000D_ Added eissn from EUPMC_x000D_ Added grants data from EUPMC_x000D_ Added date of publication from EUPMC_x000D_ Added electronic publication date from EUPMC_x000D_ Checking if XML is available fr…	43662	1996.5	GBP	1996.5	0	John Wiley & Sons Ltd	0		CC-BY		Unknown
Edinbrugh	PMC6657561	31348889	10.1016/j.cell.2019.06.006	Genome annotation improvements from cross-phyla proteogenomics and time-of-day differences in malaria mosquito proteins using un	Cell	FALSE	0092-8674, 1097-4172	1097-4172	2019-07-01T00:00:00Z	Unknown	Elsevier BV	not applicable	cc-by	cc-by	epmc_api	epmc_api	TRUE	TRUE	FALSE	TRUE	TRUE	TRUE	Added PMCID from EUPMC_x000D_ Added PMID from EUPMC_x000D_ Confirmed fulltext is in EUPMC_x000D_ Confirmed is open access from EUPMC_x000D_ Added journal title from EUPMC_x000D_ Added issn from EUPMC_x000D_ Added eissn from EUPMC_x000D_ Added grants data from EUPMC_x000D_ Added date of publication from EUPMC_x000D_ Checking if XML is available from EUPMC (since 6th March 2020 this is always done …	43704	1323.46	USD	1323.46	0		1323.46		CC-BY		Unknown
Edinbrugh	Unknown	31345766	10.1016/j.jcct.2019.07.002	S-Acylation controls functional coupling of BK channel pore-forming ÃŽÂ±-subunits and ÃŽÂ²1-subunits	Journal of cardiovascular computed tomography	FALSE	1934-5925, 1876-861X	1876-861X	2019 Sep - Oct	2019-07-17T00:00:00Z	Elsevier BV	Unknown	non-standard	Unknown	Unknown	Unknown	FALSE	FALSE	FALSE	FALSE	FALSE	FALSE	Added DOI from EUPMC_x000D_ This article is not open access according to EUPMC, but since 6th March 2020 we take this to mean only that the publisher did not indicate to EUPMC that it can be included in their Open Access subset - it may well still be an OA article._x000D_ Added journal title from EUPMC_x000D_ Added issn from EUPMC_x000D_ Added eissn from EUPMC_x000D_ Added grants data from EUPMC_…	43677	1229.4	USD	1229.4	0		1229.4		CC-BY		FALSE
Edinbrugh	PMC6855794	31337670	10.1136/heartjnl-2019-315227	Lamin A molecular compression and sliding as mechanisms behind nucleoskeleton elasticity	Heart (British Cardiac Society)	FALSE	1355-6037, 1468-201X	1468-201X	2019-11-01T00:00:00Z	2019-07-23T00:00:00Z	BMJ	not applicable	cc-by	cc-by	epmc_api	epmc_api	TRUE	TRUE	FALSE	TRUE	TRUE	TRUE	Added PMCID from EUPMC_x000D_ Added DOI from EUPMC_x000D_ Confirmed fulltext is in EUPMC_x000D_ Confirmed is open access from EUPMC_x000D_ Added journal title from EUPMC_x000D_ Added issn from EUPMC_x000D_ Added eissn from EUPMC_x000D_ Added grants data from EUPMC_x000D_ Added date of publication from EUPMC_x000D_ Added electronic publication date from EUPMC_x000D_ Checking if XML is available fr…	43642	3490	GBP	4188	0		4188		CC-BY		Unknown
Edinbrugh	PMC6855795	31337669	10.1136/heartjnl-2019-315084	Myelinated axon physiology and regulation of neural circuit function	Heart (British Cardiac Society)	FALSE	1355-6037, 1468-201X	1468-201X	2019-11-01T00:00:00Z	2019-07-23T00:00:00Z	BMJ	not applicable	cc-by	cc-by	epmc_api	epmc_api	TRUE	TRUE	FALSE	TRUE	TRUE	TRUE	Added PMCID from EUPMC_x000D_ Added DOI from EUPMC_x000D_ Confirmed fulltext is in EUPMC_x000D_ Confirmed is open access from EUPMC_x000D_ Added journal title from EUPMC_x000D_ Added issn from EUPMC_x000D_ Added eissn from EUPMC_x000D_ Added grants data from EUPMC_x000D_ Added date of publication from EUPMC_x000D_ Added electronic publication date from EUPMC_x000D_ Checking if XML is available fr…		2100	GBP	2100	0	John Wiley & Sons Ltd	2100		CC-BY		Unknown
Edinbrugh	PMC6616057	31333572	10.3389/fneur.2019.00723	Effects of isosorbide mononitrate and/or cilostazol on haematological markers, platelet function and haemodynamics in patients with lacunar ischaemic stroke: safety data from the lacunar intervention-1 (LACI-1) trial.	Frontiers in Neurology	TRUE	1664-2295	1664-2295	2019-01-01T00:00:00Z	2019-07-03T00:00:00Z	Frontiers Media SA	not applicable	cc-by	cc-by	epmc_api	epmc_api	TRUE	TRUE	FALSE	TRUE	TRUE	TRUE	Added PMCID from EUPMC_x000D_ Added PMID from EUPMC_x000D_ Confirmed fulltext is in EUPMC_x000D_ Confirmed is open access from EUPMC_x000D_ Added journal title from EUPMC_x000D_ Added issn from EUPMC_x000D_ Added eissn from EUPMC_x000D_ Added grants data from EUPMC_x000D_ Added date of publication from EUPMC_x000D_ Added electronic publication date from EUPMC_x000D_ Checking if XML is available f…	43708	2287.73	USD	2287.73	0		2287.73		CC-BY		Unknown
Edinbrugh	PMC6557003	31327882	10.1177/0162243919841693	Structures of Leishmania Fructose-1,6-Bisphosphatase Reveal Species-Specific Differences in the Mechanism of Allosteric Inhibiti	Science, technology & human values	FALSE	0162-2439	Unknown	2019-07-01T00:00:00Z	2019-04-12T00:00:00Z	SAGE Publications	not applicable	cc-by	cc-by	epmc_api	epmc_api	TRUE	TRUE	FALSE	TRUE	TRUE	TRUE	Added PMCID from EUPMC_x000D_ Added PMID from EUPMC_x000D_ Confirmed fulltext is in EUPMC_x000D_ Confirmed is open access from EUPMC_x000D_ Added journal title from EUPMC_x000D_ Added issn from EUPMC_x000D_ Added grants data from EUPMC_x000D_ Added date of publication from EUPMC_x000D_ Added electronic publication date from EUPMC_x000D_ Checking if XML is available from EUPMC (since 6th March 202…	43613	2123.95	EUR	2548.74	0		2548.74		CC-BY		Unknown
Edinbrugh	PMC6637519	31319896	10.1186/s13148-019-0702-5	Convalescent Troponin and Cardiovascular Death following	Clinical Epigenetics	TRUE	1868-7075, 1868-7083	1868-7083	2019-07-01T00:00:00Z	2019-07-18T00:00:00Z	Springer Science and Business Media LLC	not applicable	cc-by	cc-by	epmc_api	epmc_api	TRUE	TRUE	FALSE	TRUE	TRUE	TRUE	Added PMCID from EUPMC_x000D_ Added DOI from EUPMC_x000D_ Confirmed fulltext is in EUPMC_x000D_ Confirmed is open access from EUPMC_x000D_ Added journal title from EUPMC_x000D_ Added issn from EUPMC_x000D_ Added eissn from EUPMC_x000D_ Added grants data from EUPMC_x000D_ Added date of publication from EUPMC_x000D_ Added electronic publication date from EUPMC_x000D_ Checking if XML is available fr…	43637	1989	GBP	1989	0	BMJ Publishing Group Ltd	1989		CC-BY		Unknown
Edinbrugh	PMC6611418	31316911	10.3389/fonc.2019.00534	A Novel Translational Ovine Pulmonary Adenocarcinoma Model for Human Lung Cancer	Frontiers in Oncology	TRUE	2234-943X	2234-943X	2019-01-01T00:00:00Z	2019-06-19T00:00:00Z	Frontiers Media SA	not applicable	cc-by	cc-by	epmc_api	epmc_api	TRUE	TRUE	FALSE	TRUE	TRUE	TRUE	Added PMCID from EUPMC_x000D_ Added PMID from EUPMC_x000D_ Confirmed fulltext is in EUPMC_x000D_ Confirmed is open access from EUPMC_x000D_ Added journal title from EUPMC_x000D_ Added issn from EUPMC_x000D_ Added eissn from EUPMC_x000D_ Added grants data from EUPMC_x000D_ Added date of publication from EUPMC_x000D_ Added electronic publication date from EUPMC_x000D_ Checking if XML is available f…	43708	1930.99	USD	1930.99	0		0		CC-BY		Unknown
Edinbrugh	PMC6661570	31315876	10.1136/bmjopen-2019-030121	Spt5 modulates co-transcriptional spliceosome assembly in Saccharomyces cerevisiae	BMJ open	TRUE	2044-6055	2044-6055	2019-07-01T00:00:00Z	2019-07-16T00:00:00Z	BMJ	not applicable	cc-by	cc-by	epmc_api	epmc_api	TRUE	TRUE	FALSE	TRUE	TRUE	TRUE	Added PMCID from EUPMC_x000D_ Added DOI from EUPMC_x000D_ Confirmed fulltext is in EUPMC_x000D_ Confirmed is open access from EUPMC_x000D_ Added journal title from EUPMC_x000D_ Added issn from EUPMC_x000D_ Added eissn from EUPMC_x000D_ Added grants data from EUPMC_x000D_ Added date of publication from EUPMC_x000D_ Added electronic publication date from EUPMC_x000D_ Checking if XML is available fr…	43663	1231.35	USD	1477.62	0		1477.62		CC-BY		Unknown
Edinbrugh	PMC6685703	31313988	10.7554/eLife.46912	BEAGLE 3: Improved Performance, Scaling, and Usability for a High-Performance Computing Library for Statistical Phylogenetics	eLife	TRUE	2050-084X	2050-084X	2019-07-01T00:00:00Z	2019-07-17T00:00:00Z	eLife Sciences Publications, Ltd	not applicable	cc-by	cc-by	epmc_api	epmc_api	TRUE	TRUE	FALSE	TRUE	TRUE	TRUE	Added PMCID from EUPMC_x000D_ Added DOI from EUPMC_x000D_ Confirmed fulltext is in EUPMC_x000D_ Confirmed is open access from EUPMC_x000D_ Added journal title from EUPMC_x000D_ Added issn from EUPMC_x000D_ Added eissn from EUPMC_x000D_ Added grants data from EUPMC_x000D_ Added date of publication from EUPMC_x000D_ Added electronic publication date from EUPMC_x000D_ Checking if XML is available fr…	43661	1000	GBP	1200	0		1200		CC-BY		Unknown
Edinbrugh	PMC6747725	31289175	10.1128/mBio.00875-19	The kinetic characteristics of human and trypanosomatid phosphofructokinases for the reverse reaction	mBio	TRUE	2150-7511	2150-7511	2019-07-01T00:00:00Z	2019-07-09T00:00:00Z	American Society for Microbiology	not applicable	cc-by	cc-by	epmc_api	epmc_api	TRUE	TRUE	FALSE	TRUE	TRUE	TRUE	Added PMCID from EUPMC_x000D_ Added DOI from EUPMC_x000D_ Confirmed fulltext is in EUPMC_x000D_ Confirmed is open access from EUPMC_x000D_ Added journal title from EUPMC_x000D_ Added issn from EUPMC_x000D_ Added eissn from EUPMC_x000D_ Added grants data from EUPMC_x000D_ Added date of publication from EUPMC_x000D_ Added electronic publication date from EUPMC_x000D_ Checking if XML is available fr…	43636	2105	GBP	2526	0		2526		CC-BY		Unknown
Edinbrugh	PMC6800482	31289129	10.1261/rna.070425.119	Higher Insulin Resistance and Adiposity in Postmenopausal Women With Breast Cancer Treated With Aromatase Inhibitors	RNA (New York, N.Y.)	FALSE	1355-8382, 1469-9001	1469-9001	2019-10-01T00:00:00Z	2019-07-09T00:00:00Z	Cold Spring Harbor Laboratory	not applicable	cc-by	cc-by	epmc_api	epmc_api	TRUE	FALSE	FALSE	FALSE	TRUE	FALSE	Added PMCID from EUPMC_x000D_ Added DOI from EUPMC_x000D_ Confirmed fulltext is in EUPMC_x000D_ This article is not open access according to EUPMC, but since 6th March 2020 we take this to mean only that the publisher did not indicate to EUPMC that it can be included in their Open Access subset - it may well still be an OA article._x000D_ Added journal title from EUPMC_x000D_ Added issn from EUPM…	43636	2407.83	USD	3061.31	0		3061.31		CC-BY		Unknown
Edinbrugh	PMC6616311	31287970	10.1016/j.cub.2019.05.058	Diagnosing renal involvement in connective tissue disease: interpretation of antinuclear autoantibody tests	Current biology : CB	FALSE	0960-9822, 1879-0445	1879-0445	2019-07-01T00:00:00Z	Unknown	Elsevier BV	not applicable	cc-by	cc-by	epmc_api	epmc_api	TRUE	TRUE	FALSE	TRUE	TRUE	TRUE	Added PMCID from EUPMC_x000D_ Added DOI from EUPMC_x000D_ Confirmed fulltext is in EUPMC_x000D_ Confirmed is open access from EUPMC_x000D_ Added journal title from EUPMC_x000D_ Added issn from EUPMC_x000D_ Added eissn from EUPMC_x000D_ Added grants data from EUPMC_x000D_ Added date of publication from EUPMC_x000D_ Checking if XML is available from EUPMC (since 6th March 2020 this is always done f…	43630	2040	GBP	2448	0		2448		CC-BY		Unknown
Edinbrugh	PMC6719438	31278080	10.1083/jcb.201902110	Novel high-sensitivity cardiac troponin I assay in patients with suspected acute coronary syndrome	The Journal of cell biology	FALSE	0021-9525, 1540-8140	1540-8140	2019-09-01T00:00:00Z	2019-07-05T00:00:00Z	Rockefeller University Press	not applicable	cc-by	cc-by	epmc_api	epmc_api	TRUE	TRUE	FALSE	TRUE	TRUE	TRUE	Added PMCID from EUPMC_x000D_ Added DOI from EUPMC_x000D_ Confirmed fulltext is in EUPMC_x000D_ Confirmed is open access from EUPMC_x000D_ Added journal title from EUPMC_x000D_ Added issn from EUPMC_x000D_ Added eissn from EUPMC_x000D_ Added grants data from EUPMC_x000D_ Added date of publication from EUPMC_x000D_ Added electronic publication date from EUPMC_x000D_ Checking if XML is available fr…	43390	1989	GBP	1989	0	BMJ Publishing Group Ltd	1989		CC-BY-NC		Unknown
Edinbrugh	PMC6639777	31274288	10.1021/acs.analchem.9b01339	Ticagrelor to reduce myocardial injury in patients with high-risk coronary artery plaque	Analytical chemistry	FALSE	0003-2700, 1520-6882	1520-6882	2019-07-01T00:00:00Z	2019-07-05T00:00:00Z	American Chemical Society (ACS)	not applicable	cc-by	cc-by	epmc_xml_permissions	epmc_xml_permissions	TRUE	TRUE	FALSE	TRUE	TRUE	TRUE	Added PMCID from EUPMC_x000D_ Added DOI from EUPMC_x000D_ Confirmed fulltext is in EUPMC_x000D_ Confirmed is open access from EUPMC_x000D_ Added journal title from EUPMC_x000D_ Added issn from EUPMC_x000D_ Added eissn from EUPMC_x000D_ Added grants data from EUPMC_x000D_ Added date of publication from EUPMC_x000D_ Added electronic publication date from EUPMC_x000D_ Checking if XML is available fr…	43640	2350	GBP	2820	0		2820		CC-BY		Unknown
Edinbrugh	PMC6639777	31274288	10.1021/acs.analchem.9b01339	The challenge of quantifying synchrony in malaria parasites	Analytical chemistry	FALSE	0003-2700, 1520-6882	1520-6882	2019-07-01T00:00:00Z	2019-07-05T00:00:00Z	American Chemical Society (ACS)	not applicable	cc-by	cc-by	epmc_xml_permissions	epmc_xml_permissions	TRUE	TRUE	FALSE	TRUE	TRUE	TRUE	Added PMCID from EUPMC_x000D_ Added PMID from EUPMC_x000D_ Confirmed fulltext is in EUPMC_x000D_ Confirmed is open access from EUPMC_x000D_ Added journal title from EUPMC_x000D_ Added issn from EUPMC_x000D_ Added eissn from EUPMC_x000D_ Added grants data from EUPMC_x000D_ Added date of publication from EUPMC_x000D_ Added electronic publication date from EUPMC_x000D_ Checking if XML is available f…	43642	388.72	USD	388.72	0		388.72		CC-BY		Unknown
[truncated: 2,934 more rows]
